# Supplementary material for: Activation and characterization of a cryptic gene cluster reveals a cyclization cascade for polycyclic tetramate macrolactams
Source: Royal Society of Chemistry journal article supplement (doi:10.1039/c6sc03875a), 2016-10-28
Supplement: c6sc03875a1.pdf [file c6sc03875a1.pdf]

## Supplementary Information

### Activation and Characterization of a Cryptic Gene Cluster Reveal a Cyclization Cascade for Polycyclic Tetramate Macrolactams

Subhasish Saha,<sup>‡a</sup> Wenjun Zhang,<sup>‡a</sup> Guangtao Zhang,<sup>‡a</sup> Yiguang Zhu,<sup>a</sup>  
Yuchan Chen,<sup>b</sup> Wei Liu,<sup>a,c</sup> Chengshan Yuan,<sup>a</sup> Qingbo Zhang,<sup>a</sup> Haibo Zhang,<sup>a</sup>  
Liping Zhang,<sup>a</sup> Weimin Zhang,<sup>b</sup> and Changsheng Zhang<sup>a,c,\*</sup>

<sup>a</sup> CAS Key Laboratory of Tropical Marine Bio-resources and Ecology, Guangdong Key Laboratory of Marine Materia Medica, RNAM Center for Marine Microbiology; South China Sea Institute of Oceanology, Chinese Academy of Sciences, 164 West Xingang Road, Guangzhou 510301, China;

<sup>b</sup> State Key Laboratory of Applied Microbiology Southern China, Guangdong Institute of Microbiology, 100 Central Xianlie Road, Guangzhou 510070, China.

<sup>c</sup> South China Sea Resource Exploitation and Protection Collaborative Innovation Center (SCS-REPIC).

<sup>‡</sup>These authors contributed equally to this work.

\* Correspondence and requests for materials should be addressed to C.Z. (email: [czhang2006@gmail.com](mailto:czhang2006@gmail.com); [czhang@scsio.ac.cn](mailto:czhang@scsio.ac.cn))

## Content

|                                                                                                                                                         |     |
|---------------------------------------------------------------------------------------------------------------------------------------------------------|-----|
| <b>Author contributions</b> .....                                                                                                                       | S3  |
| <b>Supplementary methods</b> .....                                                                                                                      | S3  |
| Materials and reagents .....                                                                                                                            | S3  |
| Promoter engineering .....                                                                                                                              | S3  |
| In-frame deletion of the <i>ptm</i> genes .....                                                                                                         | S3  |
| Cultivation, fermentation of <i>Streptomyces pactum</i> strains and isolation of pactamides ..                                                          | S4  |
| Heterologous expression, fermentation, and PTM isolation in <i>S. lividans</i> TK64 .....                                                               | S5  |
| Structure elucidation .....                                                                                                                             | S5  |
| Expression and purification of recombinant PtmC.....                                                                                                    | S9  |
| PtmC enzyme assays .....                                                                                                                                | S9  |
| Enzymatic preparation and isolation of compound <b>18</b> .....                                                                                         | S9  |
| <i>S. lividans</i> -mediated biotransformation of compound <b>15</b> .....                                                                              | S9  |
| Cytotoxic activity assay.....                                                                                                                           | S10 |
| <b>Table S1.</b> The genetic organization of <i>ptm</i> - and <i>xia</i> -gene cluster in pCSG2404 and the predicted functions of individual Orfs ..... | S11 |
| <b>Table S2.</b> Strains and plasmids used and constructed in this study.....                                                                           | S12 |
| <b>Table S3.</b> Primers used in this study.....                                                                                                        | S13 |
| <b>Table S4.</b> <sup>1</sup> H (500 MHz) NMR Data for pactamides A-C ( <b>11-13</b> ).....                                                             | S14 |
| <b>Table S5.</b> <sup>13</sup> C (125 MHz) NMR Data for pactamides A-C ( <b>11-13</b> ) .....                                                           | S15 |
| <b>Table S6.</b> <sup>1</sup> H NMR data for pactamides D-F ( <b>14-16</b> ) .....                                                                      | S16 |
| <b>Table S7.</b> <sup>13</sup> C NMR data for pactamides D-F ( <b>14-16</b> ).....                                                                      | S17 |
| <b>Table S8.</b> <sup>1</sup> H (500 MHz) and <sup>13</sup> C (125 MHz) NMR data for <b>18</b> .....                                                    | S18 |
| <b>Fig. S1.</b> Scheme for inserting <i>ermE</i> *p promoter in front of <i>ptmA</i> .....                                                              | S19 |
| <b>Fig. S2.</b> Scheme for inserting <i>ermE</i> *p promoter in front of <i>ptmD</i> .....                                                              | S20 |
| <b>Fig. S3.</b> In-frame deletion of <i>ptmC</i> with <i>ermE</i> *p promoter inserted in front of <i>ptmA</i> .....                                    | S21 |
| <b>Fig. S4.</b> In-frame deletion of <i>ptmB1</i> with <i>ermE</i> *p promoter inserted in front of <i>ptmA</i> .....                                   | S22 |
| <b>Fig. S5.</b> In-frame deletion of <i>ptmB2</i> with <i>ermE</i> *p promoter inserted in front of <i>ptmA</i> .....                                   | S23 |
| <b>Fig. S6.</b> Characterization of compound <b>10</b> produced by <i>S. lividans</i> TK64/pCSG2814 .....                                               | S24 |
| <b>Fig. S7.</b> Spectral data for pactamide A ( <b>11</b> ) .....                                                                                       | S25 |
| <b>Fig. S8.</b> Comparison of ECD spectra of pactamides, lysobacteramide B ( <b>4</b> ) and HSAF. ....                                                  | S33 |
| <b>Fig. S9.</b> Spectral data for pactamide B ( <b>12</b> ).....                                                                                        | S34 |
| <b>Fig. S10.</b> Spectral data for pactamide C ( <b>13</b> ).....                                                                                       | S41 |
| <b>Fig. S11.</b> Spectral data for pactamide D ( <b>14</b> ).....                                                                                       | S49 |
| <b>Fig. S12.</b> Spectral data for pactamide E ( <b>15</b> ).....                                                                                       | S56 |
| <b>Fig. S13.</b> Spectral data for pactamide F ( <b>16</b> ).....                                                                                       | S63 |
| <b>Fig. S14.</b> Chemical structures of other PTMs .....                                                                                                | S70 |
| <b>Fig. S15.</b> SDS-PAGE analysis of purified proteins .....                                                                                           | S71 |
| <b>Fig. S16.</b> LC-MS analysis of PtmC reactions with deuterium labelling .....                                                                        | S72 |
| <b>Fig. S17.</b> Spectral data for isoikarugamycin ( <b>18</b> ).....                                                                                   | S73 |
| <b>Fig. S18.</b> <i>Streptomyces</i> -mediated Biotransformation of compound <b>15</b> .....                                                            | S76 |
| <b>Fig. S19.</b> phylogenetic analysis of PtmD and its analogues .....                                                                                  | S77 |
| <b>Fig. S20.</b> Comparison of highly similar PTM gene clusters and their distinct products .....                                                       | S78 |
| <b>Supplementary References</b> .....                                                                                                                   | S79 |

## Author Contributions

S.S., W.Z., G.Z., and C.Z. designed the research and wrote the manuscript; S.S., G.Z., Y.Z., and L.Z. performed the *in vivo* and *in vitro* genetic and biochemical experiments; W.Z., W.L., C.Y., Q.Z., and H.Z. isolated compounds and determined their structures. Y.C. and W.Z. performed the bioactivity assays.

## Supplementary methods

**Materials and reagents.** Bacterial strains, plasmids and primers are listed in Tables S2 and S3. Chemicals and reagents for biochemical and molecular biology are purchased from standard commercial sources.

**Promoter engineering.** The 300 bp *ermE*\*p promoter from pPWW50<sup>1</sup> and 1.4 kb *aadA* marker gene (for positive selection against spectinomycin) from pIJ778 were respectively PCR amplified and were linked by the “bridge PCR” strategy. The resulting 1.7 kb fragment was inserted in front of *ptmA* in pCSG2404 by homologous recombination via PCR targeting strategy to afford pCSG2802, which was subsequently modified to be pCSG2804 by replacing the *neo* gene with a DNA fragment containing *oriT*, *aac(3)IV* and *Int*  $\phi$ C31 from pSET152A'B<sup>2</sup> to facilitate the conjugation into *Streptomyces lividans* TK64 (Fig. S1). Similarly, the cosmids pCSG2803 and pCSG2805 were constructed to insert the *ermE* promoter and *aadA* marker in front of *ptmD* (Fig. S2). *In situ* activation of PTM gene cluster was carried out by inserting the *ermE*\*p promoter in front of *ptmA* of *S. pactum* SCSIO 2999XM47i (Table S2) by using pCSG2802 (Fig. S2) via homologous recombination to afford 2999PTMp1 (Table S2).

**In-frame deletion of the *ptm* genes.** The cosmid pCSG2801 was constructed by inserting a DNA fragment containing *oriT*, *aac(3)IV* and *Int*  $\phi$ C31 from pSET152A'B into the *neo* gene of pCSG2404.<sup>3</sup> Next, the *ptmC* gene in pCSG2801 was partially replaced by *aadA* and *oriT* from pIJ778 through PCR-targeting to afford pCSG2806 (Fig. S3). In-frame deletion of *ptmC* in pCSG2806 was performed by heating-induced FLP-recombinase to remove the inserted *aadA/oriT* cassette, to yield pCSG2808. Finally, the 1.7 kb *ermE*\*p promoter and *aadA* marker gene were inserted in front of *ptmA* in pCSG2808 via the above-mentioned promoter engineering strategy to afford

pCSG2809 (Fig. S3). Similarly, the cosmids pCSG2811 (carrying the in-frame deleted *ptmB1* and the *ermE*\*p promoter inserted in front of *ptmA*, Table S2, Fig. S4) and pCSG2814 (carrying the in-frame deleted *ptmB2* and the *ermE*\*p promoter inserted in front of *ptmA*, Table S2, Fig. S5) were constructed.

**Cultivation, fermentation of *Streptomyces pactum* strains and isolation of pactamides.** *Streptomyces pactum* SCSIO 02999 was a marine actinobacteria isolated from the marine sediment sample obtained from South China Sea (E109°53.171', N16°3.576') at the depth of 880 m.<sup>4</sup> The strains SCSIO 02999, 2999XM47i, and 2999PTMp1 were cultivated on the medium 38# agar plate supplemented with 3% sea salts. Three independent single colonies of each strain were inoculated into 50 mL of the R5 media (sucrose 103 g/L, K<sub>2</sub>SO<sub>4</sub> 0.25 g/L, MgCl<sub>2</sub>·6H<sub>2</sub>O 10.12 g/L, glucose 10 g/L, casamino acid 0.1 g/L, yeast extract 5.0 g/L, K<sub>2</sub>HPO<sub>4</sub> 0.5 g/L, trace elements 0.1 mL/L, pH 7.2-7.4) and incubated at 28 °C for 5–7 days. The production of PTM-like compounds was monitored via HPLC analysis on Agilent. HPLC was carried out using a reversed phase column Luna C18, 5 μm, 150 × 4.6 mm (Phenomenex), with UV detection at 300 nm under the following program: solvent system (solvent A, 10% acetonitrile in water supplementing with 0.1% formic acid; solvent B, 90% acetonitrile in water); 5% B to 100% B (linear gradient, 0–18 min), 100% B (18–23 min), 100% B to 5% B (23–27 min), 5% B (27–32min); flow rate at 1 mL/min.

A fresh single colony of the strain 2999PTMp1 from the Medium 38# plate was inoculated into 50 mL seed R5 medium with 3% sea salt in a 250 mL Erlenmeyer flask and incubated at 28 °C on a rotary shaker (200 r.p.m.) for 5–7 days. Then 30 mL of the seed culture were inoculated into to 200 mL of the production R5 medium with 3% sea salt into a 1000 mL Erlenmeyer flask, and were cultured on a rotary shaker (200 r.p.m) at 28 °C for 7 days. The broths of a total of 20 L fermentation of 2999PTMp1 were extracted three times with 5 L Butanone, respectively, to afford the crude extracts (7.0 g) after evaporation. The residue (7.0 g) was dissolved in a 1:1 mixture of CHCl<sub>3</sub>-MeOH and mixed with an appropriate amount of silica gel for normal phase silica gel column chromatography (Silica Flash Column 14.5 × 2.5 cm, 40 g), eluted with a gradient elution of CHCl<sub>3</sub>/MeOH mixture from 100/0, 95/5, 90/10, and 80/20 to yield four fractions (Fr1-Fr4). Fr2 (500 mg) was purified by Sephadex LH-20 (120 × 3.5 cm i.d.), eluting with CHCl<sub>3</sub>/MeOH (5:5 v/v) to give Fr2B-Fr2D, Fr2B (100 mg) was further purified by prepare HPLC with C-18 reverse phased column (250 × 10.0 mm

i.d., 5 $\mu$ m) to afford pactamide B (**11**, 26 mg) and pactamide E (**15**, 2.5 mg). Fr2C (200 mg) was further purified by semi-preparative HPLC with C-18 reverse phased column (250  $\times$  10.0 mm i.d., 5 $\mu$ m) to afford pactamide A (**12**, 30 mg), pactamide D (**14**, 3.2 mg). Pactamide E (**16**, 4.7 mg) was obtained from Fr2D by semi-preparative HPLC.

#### Heterologous expression, fermentation, and PTM isolation in *S. lividans* TK64.

The cosmids pCSG2801, pCSG2804, pCSG2805, pCSG2809, pCSG2811 and pCSG2814 (Table S2 and Fig. S1-S5), together with the vector control pSET152, were introduced into the heterologous strain *Streptomyces lividans* TK64 by conventional conjugation.<sup>5</sup> Three independent transconjugants for each cosmid were inoculated into 50 mL R5 production medium and incubated at 28  $^{\circ}$ C for 5–7 days. The production of PTM-like compounds was monitored by HPLC using the same conditions as described for monitoring *Streptomyces pactum* strains. The crude extracts (4.7 g) of butanone extraction from 10 L fermentation of *S. lividans* TK64/pCSG2809 were subjected to column chromatography (CC) over a Silica Flash Column (14.5  $\times$  2.5 cm, 40 g), eluting with a gradient of CHCl<sub>3</sub>/MeOH (100:0  $\rightarrow$  0:100) to give four fractions (Fr.1-Fr.4). Fr 2 (165 mg) was further purified sequentially by Sephadex LH-20 (120  $\times$  3.5 cm i.d.) and C-18 reverse phase column (250  $\times$  10.0 mm ID, 5  $\mu$ m) to get compound **13** (25 mg).

#### Structure elucidation.

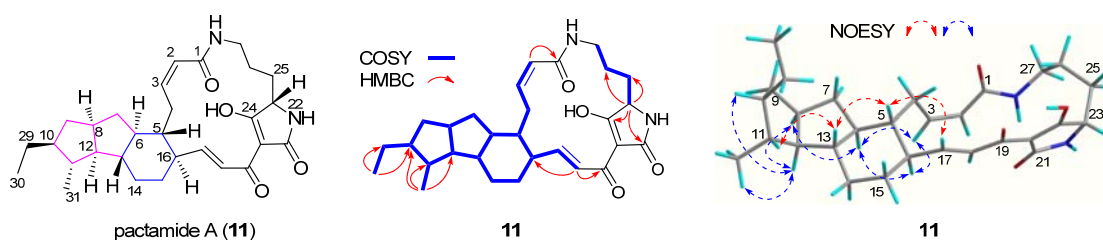

The molecular formula of pactamide A (**11**) was established as C<sub>29</sub>H<sub>40</sub>N<sub>2</sub>O<sub>4</sub> by HRESIMS ( $m/z$  481.3098 [M + H]<sup>+</sup>, calcd 481.3066). The NMR spectroscopic data of **11** (Tables S4-S5 and Fig. S7) were very similar to those of lysobacteramide B (**4**, Scheme 1),<sup>6</sup> except that signals for the C-14 hydroxy group and the N-22 methyl group in **4** were absent in **11**. The relative configuration of **11** was deduced by proton coupling constants ( $Z\Delta^{2,3}$   $J_{2,3}$  11.5 Hz;  $E\Delta^{17,18}$   $J_{17,18}$  15.0 Hz, Table S4) and NOESY correlations (Fig. S7). The assignment of H-5/H-11/H-13 on the same side of the 5/5/6-tricyclic ring system in **11**, while H-6/H-8/H-10/H-12/H-16/H<sub>3</sub>-31 on another side,

was supported by the observed NOESY correlations (Fig. S7). On the basis of the biosynthetic origin of L-ornithine of PTMs,<sup>6, 7</sup> the *S*-configuration was assignable to C-23. Although the relative configuration of C-10 in **11** and **4** appeared to be opposite, both **11** and **4** exhibited almost identical ECD spectra (Fig. S8).<sup>6</sup> Thus, the absolute configuration of **11** was deduced as 5*R*, 6*S*, 8*S*, 10*S*, 11*R*, 12*R*, 13*S*, 16*R* and 23*S*.

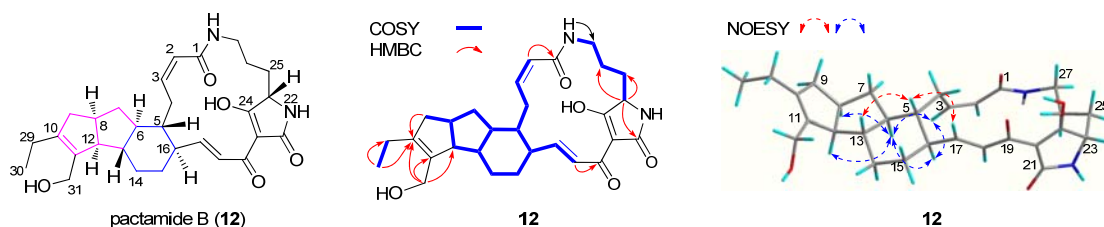

Pactamide B (**12**) was isolated as a white powder. Its molecular formula was established as  $C_{29}H_{38}N_2O_5$  by HRESIMS ( $m/z$  493.2707 [ $M - H$ ]<sup>-</sup>, calcd 493.2708). Comparison of highly similar NMR spectroscopic data of **11** and **12** (Tables S4-S5 and Fig. S9) suggested the absence of the methyl at the C-31 position in **12**, while two mutually coupled methylene doublets appeared at  $\delta_H$  3.05, 4.05. Compound **12** had two additional  $sp^2$  quaternary carbons ( $\delta_C$ : 136.6, and 137.4) compared with **11**. HMBC from H-30 to C-10 ( $\delta_C$ : 136.6) indicated that C-C single bond in **11** was transformed into C=C double bond in **12**. HMBC correlations from H-31a/H31b ( $\delta_H$  3.05, 4.05) to C-10/C-11/C-12 confirmed that a hydroxymethyl group was located at C-11 in **12**, different from the methyl group in **11**. These assignments were further supported by detailed 2D NMR analysis (Fig. S9), thus establishing the planar structure of **12**. The relative configuration of double bonds in **12** was established by proton coupling constants ( $Z\Delta^{2,3} J_{2,3}$  11.5 Hz;  $E\Delta^{17,18} J_{17,18}$  15.5 Hz, Table S4). The assignment of H-5/H-13 on the same side of the 5/5/6-tricyclic ring system in **12**, while H-6/H-8/H-12/H-16 on another side, was supported by the observed NOESY correlations (Fig. S9). By comparing ECD spectra (Fig. S8) of **12** and lysobacteramide B (**4**),<sup>6</sup> the absolute configuration of **12** was deduced to be 5*R*, 6*S*, 8*R*, 12*S*, 13*S*, 16*R* and 23*S*.

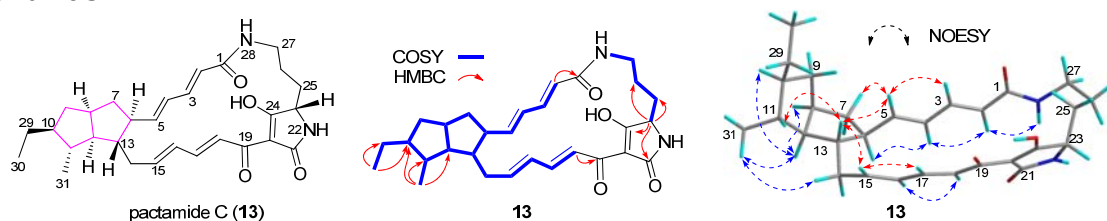

The molecular formula of pactamide C (**13**) was determined as  $C_{29}H_{38}N_2O_4$  by HRESIMS ( $m/z$  479.2901 [ $M + H$ ]<sup>+</sup>, calcd 479.2904). Detailed analyses and

comparison of NMR spectra of **13** and **11**, confirmed that **13** differed from **11** by the absence of the six-membered ring (Tables S4-S5 and Fig. S10). The relative configuration of **13** was established by proton coupling constants ( $E\Delta^{2,3} J_{2,3}$  15.0 Hz;  $E\Delta^{4,5} J_{4,5}$  14.5 Hz;  $E\Delta^{15,16} J_{15,16}$  14.5 Hz;  $E\Delta^{17,18} J_{17,18}$  15.0 Hz, Table S4) and NOESY correlations (Fig. S10). The assignment of H-11/H-13 on the same side of the 5/5-bicyclic ring system in **13**, while H-6/H-8/H-10/H-12/H<sub>3</sub>-31 on another side, was supported by the observed NOESY correlations (Fig. S10). The absolute configuration of **13** was tentatively assigned as 6*S*, 8*S*, 10*S*, 11*R*, 12*R*, 13*S*, and 23*S* upon considering it as a biosynthetic precursor of **11**.

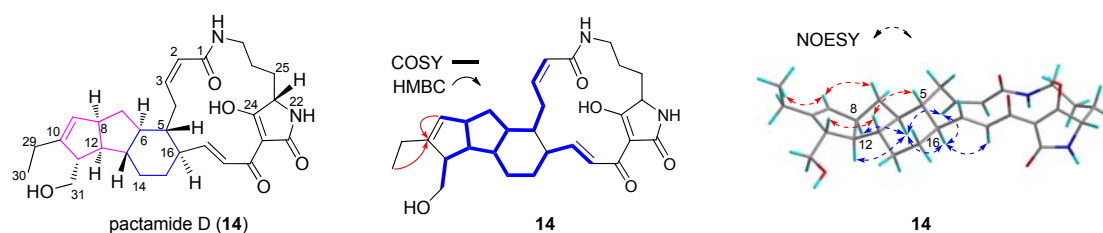

The molecular formula of pactamide D (**14**) was established as C<sub>29</sub>H<sub>38</sub>N<sub>2</sub>O<sub>5</sub> by HRESIMS ( $m/z$  517.2665 [M + Na]<sup>+</sup>, calcd 517.2678). The NMR spectroscopic data of **14** and **12** were very similar. The carbon C-11 in **12** was a sp<sup>2</sup> quaternary carbon, however, the carbon C-11 in **14** was a sp<sup>3</sup> methine ( $\delta_H$  2.72 br s,  $\delta_C$  46.8, C-11) (Tables S4-S7, Fig. S11). HMBC correlation from H<sub>3</sub>-30 to a sp<sup>2</sup> quaternary carbon (C-10) in **14** suggested a  $\Delta^{9,10}$  double bond. This assignment was further supported by the HMBC correlation from H-9 to C-10, the COSY correlation between H-8/H-9, and NOESY correlations of H-9/H-30, H-9/H-7 (Fig. S11). The relative configuration of double bonds in **14** was established to be the same as that of **12**, by proton coupling constants ( $Z\Delta^{2,3} J_{2,3}$  11.0 Hz;  $E\Delta^{17,18} J_{17,18}$  14.5 Hz, Table S6). The assignment of H-5/H-11/H-13 on the same side of the 5/5/6-tricyclic ring system in **14**, while H-6/H-8/H-12/H-16 on another side, was supported by the observed NOESY correlations (Fig. S11). The absolute configuration of **14** was assigned as 5*R*, 6*S*, 8*S*, 11*S*, 12*R*, 13*S*, 16*R* and 23*S* by comparing ECD spectra of **14** and **4** (Fig. S8).<sup>6</sup>

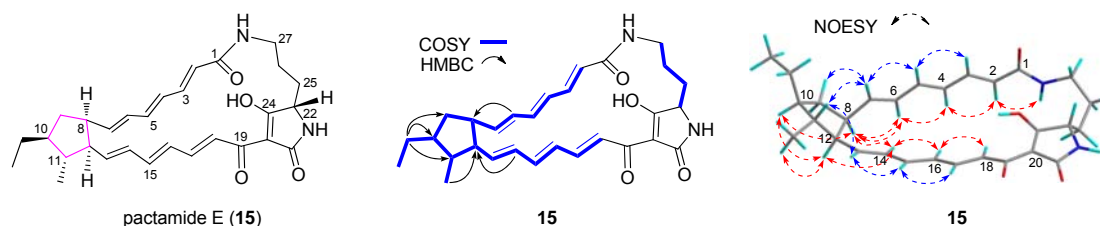

Pactamide E (**15**) was isolated as a pale-yellow powder. Its molecular formula

was determined as  $C_{29}H_{36}N_2O_4$  by HRESIMS ( $m/z$  499.2581  $[M + Na]^+$ , calcd 499.2567). The NMR data (Table S6-S7, Fig. S12) of **15** were similar to those of compound **13**, the difference was that **15** had twelve olefins, which suggested that **15** had only one five-membered ring compared with **13**. The structure **15** was further supported by detailed 2D NMR analysis. The relative configuration of double bonds in **15** was established by proton coupling constants ( $E\Delta^{2,3} J_{2,3}$  15.0 Hz;  $E\Delta^{4,5} J_{4,5}$  14.5 Hz;  $E\Delta^{6,7} J_{6,7}$  15.0 Hz;  $E\Delta^{13,14} J_{13,14}$  15.5 Hz;  $E\Delta^{15,16} J_{15,16}$  15.0 Hz;  $E\Delta^{17,18} J_{17,18}$  14.5 Hz, Table S6). The assignment of H-8/H-10/H-12/H<sub>3</sub>-31 on the same side of the outer 5-membered ring system in **15**, was supported by the observed NOESY correlations (Fig. S12). The absolute configuration of **15** was tentatively assigned as 8*S*, 10*S*, 11*R*, 12*S*, upon considering it as a biosynthetic precursor of **13**.

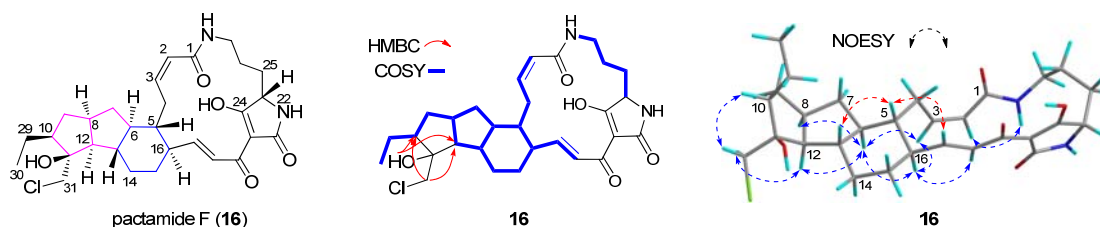

The molecular formula of pactamide F (**16**) was established as  $C_{29}H_{39}ClN_2O_5$  by HRESIMS ( $m/z$  531.2606  $[M + H]^+$ , calcd 531.2626), which exhibited a typical chlorine isotope pattern (Fig. S13). The NMR spectroscopic data of **16** and **11** were very similar (Tables S4-S7). The methyl doublets typical for H<sub>3</sub>-31 in **11** were absent in **16**, while signals for a methylene (H<sub>2</sub>-31) were found in **16** (Fig. S13), suggesting the chlorine /or -OH substitution should be assigned at C-31. HMBC correlations from OH-11 to C-10 and C-12 located the OH group at C-11. The planar structure of **16** was further supported by detailed NMR analyses (Tables S6-S7 and Fig. S13). The relative configuration of **16** was deduced by proton coupling constants ( $Z\Delta^{2,3} J_{2,3}$  10.5 Hz;  $E\Delta^{17,18} J_{17,18}$  15.0 Hz, Table S6) and NOESY correlations (Fig. S13). The assignment of H-5/H-13 on the same side of the 5/5/6-tricyclic ring system, while H-6/H-8/H-10/H-12/H-16 on another side in **16**, was supported by the observed NOESY correlations (Fig. S13). The absolute configuration of **16** was assigned as 5*R*, 6*S*, 8*R*, 10*S*, 11*S*, 12*S*, 13*S*, 16*R*, 23*S*, given almost identical ECD spectra of **16** and **4** (Fig. S8).<sup>6</sup>

**Expression and purification of recombinant PtmC.** The *ptmC* gene was PCR-amplified from genomic DNA of *S. pactum* SCSIO 02999 using the primer pairs EptmCF/EptmCR (Table S3) with high fidelity DNA polymerase FastPfu (TransGen



Biotech). PCR products were digested with *Nde*I/*Bam*HI and inserted into the vector pET28a to give the expression plasmid pCSG3621 (Table S2) after sequence confirmation. The expression and purification of *N*-(His)<sub>6</sub>-tagged PtmC was performed from *E. coli* BL21(DE3) carrying pCSG3621 according to the same procedure as described for IkaC.<sup>8</sup> C-(His)<sub>6</sub>-tagged TaGDH and *N*-(His)<sub>6</sub>-tagged BmGDH proteins were purified via Ni<sup>2+</sup>-NTA agarose (Invitrogen) from *E. coli* BL21(DE3)/pCSG3622 and *E. coli* BL21(DE3)/pRSF-BmGDH (Table S3) as previously described.<sup>8</sup>

**PtmC enzyme assays.** A standard PtmC assay contained 200 μM **13** (or **17**), 2 mM NADPH, and 10 μg of purified recombinant PtmC in 200 mM sodium phosphate buffer (pH 8.0) in a total volume of 100 μL. The reaction was performed at 28 °C for 10 h. The enzyme reactions were terminated by addition of equal volume of cold methanol. After removal of the precipitated protein by centrifugation at 14,000 r.p.m. for 30 min, the reaction mixtures were concentrated on a rotating vacuum evaporator at 30 °C to a final volume of 100 μL before injection into HPLC. The PtmC/GDH coupling assays were performed as previously reported.<sup>8</sup> The reaction was stopped by the addition of 200 μL methanol. The enzyme assays were analyzed by HPLC on an Agilent series 1260 by using a reversed phase column Luna C18, 5 μm, 150 × 4.6 mm (Phenomenex) with UV detection at 300 nm under the following program: solvent system (solvent A, 10% acetonitrile in water supplementing with 0.1% formic acid; solvent B, 90% acetonitrile in water); 5% B to 100% B (linear gradient, 0–15 min), 100% B (15–22min), 100% B to 5%B (22–24 min), 5% B (24–30 min); flow rate at 1 mL/min.

**Enzymatic preparation and isolation of compound 18.** The PtmC reaction was carried out in a total volume of 100 mL containing 20 mg compound **18**, 10 mg purified recombinant PtmC, and 1 mM NADPH. The reaction was incubated at 28 °C for 12 h. The reaction product was freeze-dried and dissolved in a 1:1 mixture of CHCl<sub>3</sub>-MeOH. CHCl<sub>3</sub>-MeOH extract was evaporated to dryness. The residue (8 mg) were subjected to semi-preparative HPLC with C-18 reverse phased column (250 × 10.0 mm i.d., 5 μm) to yield isoikarugamycin (**18**, 1.7 mg).

***S. lividans*-mediated biotransformation of compound 15.** The biotransformation of compound **15** was carried out with the strain *S. lividans* TK64 harboring pCSG2814. The strain was inoculated into 30 mL of AM6 medium containing 50 μg/mL apramycin and 50 μM compound **15**, and was grown at 28 °C for 5 days. The products were extracted by butanone and were analyzed by HPLC. HPLC analysis (Agilent system)

was carried out using a reversed phase column Luna C18, 5  $\mu\text{m}$ , 150  $\times$  4.6 mm (Phenomenex), with UV detection at 300 nm under the following program: solvent system (solvent A, 10% acetonitrile in water supplementing with 0.1% formic acid; solvent B, 90% acetonitrile in water); 5% B to 100% B (linear gradient, 0–18 min), 100% B (18–23 min), 100% B to 5% B (23–27 min), 5% B (27–32min); flow rate at 1 mL/min]. *S. lividans* TK64 harboring pCSG2814 without adding compound **15** was treated in the same manner to serve as a negative control.

**Cytotoxic activity assay.** Pactamides A-F (**11-16**) were evaluated for their cytotoxic activities against SF-268 (human glioma cell line), MCF-7 (human breast adenocarcinoma cell line), NCI-H460 (human non-small cell lung cancer cell line), and HepG2 (human liver hepatocellular cell line) with the SRB method.<sup>9</sup> Cells (180  $\mu\text{L}$ ) with a density of  $3 \times 10^4$  cells/mL of media were seeded onto 96-well plates and incubated for 24 h at 37  $^{\circ}\text{C}$ , 5%  $\text{CO}_2$ . Then 20  $\mu\text{L}$  of various concentrations of compounds were added to plate wells. The plates were further incubated for 72 h. After incubation, cell monolayers were fixed with 50% (wt/v) trichloroacetic acid (50  $\mu\text{L}$ ) and stained for 30 min with 0.4% (wt/v) SRB dissolved in 1% acetic acid. Unbound dye was removed by washing repeatedly with 1% acetic acid. The protein-bound dye was dissolved in 10 mM Tris base solution (200  $\mu\text{L}$ ) for OD determination at 570 nm using a microplate reader. Cisplatin was used as a positive control possessing potent cytotoxic activity. All data were obtained in triplicate and are presented as means  $\pm$  S.D.  $\text{IC}_{50}$  values were calculated with the SigmaPlot 10.0 software using a non-linear curve-fitting method.

**Table S1.** The genetic organization of *ptm*- and *xia*-gene cluster in pCSG2404 and the predicted functions of individual Orfs.

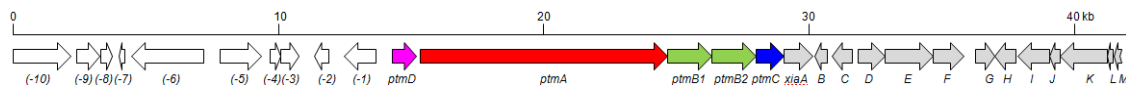

| Name            | AA   | Proposed function                                                        | Closest homologue, Acc. No., Source                              | I/S%    |
|-----------------|------|--------------------------------------------------------------------------|------------------------------------------------------------------|---------|
| <i>orf(-10)</i> | 722  | alpha-mannosidase                                                        | SMCF_5217, EHN75294, <i>Streptomyces coelicoflavus</i> ZG0656    | 91/95   |
| <i>orf(-9)</i>  | 286  | transcriptional regulator                                                | SCO6003, NP_630118, <i>Streptomyces coelicolor</i> A3(2)         | 84/90   |
| <i>orf(-8)</i>  | 143  | hypothetical protein                                                     | NP_630117, NP_630115, <i>Streptomyces coelicolor</i> A3(2)       | 57/71   |
| <i>orf(-7)</i>  | 65   | hypothetical protein                                                     | SCO6000, <i>Streptomyces coelicolor</i> A3(2),                   | 67/73   |
| <i>orf(-6)</i>  | 913  | aconitate hydratase                                                      | SMCF_5190, EHN75342, <i>Streptomyces coelicoflavus</i> ZG0656    | 97/98   |
| <i>orf(-5)</i>  | 509  | UDP-N-acetylglucosamine 1-carboxyvinyltransferase                        | WP_031042816, <i>Streptomyces</i>                                | 100/100 |
| <i>orf(-4)</i>  | 130  | hypothetical protein                                                     | WP_030580287, <i>Streptomyces sclerotialus</i>                   | 92/96   |
| <i>orf(-3)</i>  | 225  | hypothetical protein STRIP9103_07747                                     | EKX63740, <i>Streptomyces ipomoeae</i> 91-03                     | 95/97   |
| <i>orf(-2)</i>  | 172  | hypothetical protein                                                     | WP_037762956, <i>Streptomyces</i> sp. FXJ7.023                   | 98/98   |
| <i>orf(-1)</i>  | 396  | hypothetical protein                                                     | WP_031042807, <i>Streptomyces olivaceus</i>                      | 97/98   |
| <i>ptmD</i>     | 301  | hydroxylase                                                              | WP_037762956, <i>Streptomyces</i> sp. FXJ7.023                   | 98/98   |
| <i>ptmA</i>     | 3114 | PKS/NRPS                                                                 | WP_031042761, <i>Streptomyces olivaceus</i>                      | 98/98   |
| <i>ptmB1</i>    | 561  | FAD-dependent oxidoreductase                                             | WP_031042758, <i>Streptomyces olivaceus</i>                      | 99/99   |
| <i>ptmB2</i>    | 552  | phytoene dehydrogenase                                                   | WP_033302652, <i>Streptomyces atroolivaceus</i>                  | 99/99   |
| <i>ptmC</i>     | 351  | alcohol dehydrogenase                                                    | WP_043224439, <i>Streptomyces</i> sp. NRRL F-5193                | 98/98   |
| <i>xiaA</i>     | 363  | Rieske 2Fe-2S domain-containing aromatic ring-hydroxylating dioxygenases | Strvi_4991, AEM84537, <i>Streptomyces violaceusniger</i> Tu 4113 | 42/56   |
| <i>xiaB</i>     | 164  | flavin reductase domain protein FMN-binding                              | Strvi_6224, AEM85702, <i>Streptomyces violaceusniger</i> Tu 4113 | 76/84   |
| <i>xiaC</i>     | 258  | lclR family transcriptional regulator,                                   | lclR, WP_014985470, <i>Nocardia brasiliensis</i> ,               | 33/51   |

**Table S2.** Strains and plasmids used and constructed in this study.

| Strains/Plasmids                       | Description                                                                                                                        | Reference            |
|----------------------------------------|------------------------------------------------------------------------------------------------------------------------------------|----------------------|
| <i>E. coli</i>                         |                                                                                                                                    |                      |
| DH5α                                   | Host strain for cloning                                                                                                            | Invitrogen           |
| BW25113/pIJ790                         | Host strain for PCR targeting                                                                                                      | 10                   |
| ET12567/pUZ8002                        | Donor strain for conjugation                                                                                                       | 11                   |
| BL21(DE3)                              | Host strain for protein expression                                                                                                 | Transgen             |
| <i>Streptomyces</i>                    |                                                                                                                                    |                      |
| <i>Streptomyces pactum</i> SCSIO 02999 | Wild-type strain                                                                                                                   | 4                    |
| <i>Streptomyces lividans</i> TK64      | Host strain for heterologous expression                                                                                            | 5                    |
| 2999XM47i                              | <i>Streptomyces pactum</i> SCSIO 02999 derivative where <i>xiaP</i> gene was in-frame deleted                                      | This study           |
| 2999PTMp1                              | <i>Streptomyces pactum</i> SCSIO 02999XM47i derived where <i>ermE</i> *p promoter was inserted in front of <i>ptmA</i>             | This study           |
| Plasmids                               |                                                                                                                                    |                      |
| BT340                                  | Cm <sup>r</sup> , express FLP-recombinase to form in-frame deletion genes                                                          | 10                   |
| pET28a                                 | expression vector, Km <sup>r</sup>                                                                                                 | Novagen              |
| pPWW50A                                | Ap <sup>r</sup> , vector for <i>Streptomyces</i> heterologous expression                                                           | 12                   |
| pIJ778                                 | the template for amplifying the <i>aadA</i> cassette                                                                               | 13                   |
| pSET152                                | <i>Streptomyces</i> integrative vector; Ap <sup>r</sup>                                                                            |                      |
| pCSG2404                               | genomic library cosmid of <i>S. pactum</i> SCSIO 02999                                                                             | 3                    |
| pCSG2801                               | pCSG2404 derivative where the <i>neo</i> gene was replaced with <i>aac(3)IV-oriT-Int</i> φC31 fragment                             | This study (Fig. S3) |
| pCSG2802                               | pCSG2404 derivative with <i>aadA</i> and <i>ermE</i> *p promoter inserted in front of <i>ptmA</i>                                  | This study (Fig. S1) |
| pCSG2803                               | pCSG2404 derivative with <i>aadA</i> and <i>ermE</i> *p promoter inserted in front of <i>ptmD</i>                                  | This study (Fig. S2) |
| pCSG2804                               | pCSG2802 derivative where the <i>neo</i> gene was replaced with <i>aac(3)IV-oriT-Int</i> φC31 fragment                             | This study (Fig. S1) |
| pCSG2805                               | pCSG2803 derivative where the <i>neo</i> gene was replaced with <i>aac(3)IV-oriT-Int</i> φC31                                      | This study (Fig. S2) |
| pCSG2806                               | pCSG2801 derivative where the <i>ptmC</i> gene was disrupted by insertional mutation with <i>aadA</i>                              | This study (Fig. S3) |
| pCSG2807                               | pCSG2801 derivative where the <i>ptmB1</i> gene was disrupted by insertional mutation with <i>aadA</i>                             | This study (Fig. S4) |
| pCSG2808                               | pCSG2806 derivative where <i>ptmC</i> gene was in-frame deleted                                                                    | This study (Fig. S3) |
| pCSG2809                               | pCSG2808 derivative where <i>aadA</i> and <i>ermE</i> *p promoter inserted in front of <i>ptmA</i>                                 | This study (Fig. S3) |
| pCSG2810                               | pCSG2807 derivative where <i>ptmB1</i> gene was in-frame deleted                                                                   | This study (Fig. S4) |
| pCSG2811                               | pCSG2810 derivative where <i>aadA</i> and <i>ermE</i> *p promoter inserted in front of <i>ptmA</i>                                 | This study (Fig. S4) |
| pCSG2812                               | pCSG2801 derivative where the <i>ptmB2</i> gene was disrupted by insertional mutation with <i>aadA</i>                             | This study (Fig. S5) |
| pCSG2813                               | pCSG2812 derivative where <i>ptmB2</i> gene was in-frame deleted                                                                   | This study (Fig. S5) |
| pCSG2814                               | pCSG2813 derivative where <i>aadA</i> and <i>ermE</i> *p promoter inserted in front of <i>ptmA</i>                                 | This study (Fig. S5) |
| pCSG3641                               | pET-28a derivative containing a 1.1 kb <i>NdeI/BamHI</i> <i>ptmC</i> PCR fragment from genomic DNA of <i>S. pactum</i> SCSIO 02999 | This study           |

**Table S3.** Primers used in this study.

| Primers                                                                 | Gene Target  | Sequence                                                     |
|-------------------------------------------------------------------------|--------------|--------------------------------------------------------------|
| <b>For insertion of the <i>ermE</i><sup>p</sup> promoter</b>            |              |                                                              |
| ermEp-F                                                                 |              | GAAGCAGCTCCAGCCTACACAGGCGGTACCAGCCCGACC                      |
| ermE-p1-R                                                               |              | GACCTTGTGCGGGTGGGCGGCGCTGGGTGAGTCCGTCATGGTTGCCCGCTCTCCTCT    |
| p1-aadA-F                                                               |              | CTGCTCCACCCCGTGCGCCGCCGACCCACACCGCGTAGattccggggatccgctgacc   |
| p-aadA-R                                                                |              | GGTCGGGCTGGTACCGCCTGttaggctggagctgcttc                       |
| ermE-p2-R                                                               |              | ATTCGCCGGCAGCGACCCCGTATCGGGTGCATCTTCATGGTTGCCCGCTCTCCTCT     |
| p2-aadA-F                                                               |              | TGGCTCACGCCCGACTCTAAGAGCTGGAGATCAAGTAAattccggggatccgctgacc   |
| <b>For detection of promoter insertion</b>                              |              |                                                              |
| ermE-P1-det                                                             |              | CAGCGTCTCGAAGCCGAGGT                                         |
| ermE-P1-det                                                             |              | CGGATTCTCCGCCGACTGC                                          |
| ermE-P2-det                                                             |              | CCGCTCCAGCGCCGCGAGAT                                         |
| ermE-P2-det                                                             |              | GTCGCCGTCCGTCGTCCGT                                          |
| <b>For construction of gene disruption mutant</b>                       |              |                                                              |
| ptmC-dis-F                                                              | <i>ptmC</i>  | CTCCACGGGATCGCCCTGGACACCCCGGCGGGCGACCACattccggggatccgctgacc  |
| ptmC-dis-R                                                              |              | GAGCATCGTGAAGACGGTGTGCGTCATGACCCCGCCGAGttaggctggagctgcttc    |
| ptmB1-dis-F                                                             | <i>ptmB2</i> | CGAACGCTGCTCGGATCCTGCCGGCGTTCCGGCTGTACattccggggatccgctgacc   |
| ptmB1-dis-R                                                             |              | CATCCCGGTCCACTGCCCGCCATCGAGAAGCCGCTCAGttaggctggagctgcttc     |
| ptmB2-dis-F                                                             | <i>ptmB2</i> | ACGGTGC CGCGCCGGGACGGGCGGGCGGTCCACTTCTACattccggggatccgctgacc |
| ptmB2-dis-R                                                             |              | GCGGCGGATCCGGGTGAACTGCTCGGGACCGGTGCTCAGttaggctggagctgcttc    |
| <b>For detection of gene disruption mutant/in-frame deletion mutant</b> |              |                                                              |
| ptmC-det F                                                              | <i>ptmC</i>  | CCCAGTTGTCCTCGGTGAAC                                         |
| ptmC-det R                                                              |              | AGAAGTGGATCGTCAGCGA                                          |
| ptmB1-det F                                                             | <i>ptmB1</i> | GGCCACCGCCGCCTTCCCGG                                         |
| ptmB1-det R                                                             |              | CCCGGACCGGCTCCAGAAC                                          |
| ptmB2-det F                                                             | <i>ptmB2</i> | CTCGCCGCTGTCCACGAACG                                         |
| ptmB2-det R                                                             |              | AGATCCCGGGCGGCTCCTG                                          |
| <b>For <i>ptmC</i> protein expression</b>                               |              |                                                              |
| EptmCF                                                                  | <i>ptmC</i>  | GCGCATATGAAGACCGAGAAGTGGATCGT                                |
| EptmCR                                                                  |              | GCGGGATCCTCACAGCTCGACCAGCACCTTG                              |

**Table S4.**  $^1\text{H}$  (500 MHz) NMR Data for pactamides A-C (11-13).

| No. | $11^a$                                | $12^b$                                | $13^b$                                |
|-----|---------------------------------------|---------------------------------------|---------------------------------------|
|     | $\delta_{\text{H}}$ , mult. (J in Hz) | $\delta_{\text{H}}$ , mult. (J in Hz) | $\delta_{\text{H}}$ , mult. (J in Hz) |
| 2   | 5.73, d (11.5)                        | 5.75, d (11.5)                        | 5.81, d (15.0)                        |
| 3   | 5.97, dd (11.5, 10.5)                 | 5.99, dd (11.5, 10.6)                 | 6.73, dd (15.0, 11.0)                 |
| 4   | 2.01, m<br>3.37, m                    | 1.99, m<br>3.54, t (13.1)             | 6.16, dd (14.5, 11.0)                 |
| 5   | 1.24, m                               | 1.29, m                               | 5.65, dd (14.5, 10.0)                 |
| 6   | 1.43, m                               | 1.43, m                               | 2.44, m                               |
| 7   | 0.77, m<br>1.97, m                    | 0.80, m<br>2.10, m                    | 1.13, m<br>1.88, m                    |
| 8   | 2.29, m                               | 2.52, m                               | 2.36, m                               |
| 9   | 0.72, m<br>1.98, m                    | 2.00, m<br>2.52                       | 0.86, m<br>1.97, m                    |
| 10  | 1.27, m                               |                                       | 1.33, m                               |
| 11  | 1.13, m                               |                                       | 1.27, m                               |
| 12  | 1.54, m                               | 2.83, t (7.2)                         | 1.63, m                               |
| 13  | 1.01, m                               | 1.02, m                               | 1.41, m                               |
| 14  | 1.01, m<br>1.87, m                    | 1.20, m<br>2.13, m                    | 2.10, m<br>2.47, m                    |
| 15  | 1.20, m<br>1.67, m                    | 1.31, m<br>1.66, m                    | 5.80, overlapping                     |
| 16  | 1.94, m                               | 2.00, m                               | 6.06, dd (14.5, 11.0)                 |
| 17  | 6.52, dd (15.0, 9.0)                  | 6.60, dd (15.5, 10.8)                 | 6.93, dd (15.0, 11.0)                 |
| 18  | 7.38, d (15.0)                        | 6.98, d (15.5)                        | 7.40, d (15.0)                        |
| 22  |                                       | NH 8.66, br s                         |                                       |
| 23  | 3.61, br s                            | 3.81, br s                            | 3.54, br s                            |
| 25  | 1.77, m<br>1.86, m                    | 1.75, m<br>1.86, m                    | 1.76, m<br>1.85, m                    |
| 26  | 1.30, m<br>1.44, m                    | 1.16, m<br>1.32, m                    | 0.87, m<br>1.31, m                    |
| 27  | 2.57, m<br>3.31, m                    | 2.42, t (11.7)<br>3.24, d (11.7)      | 2.35, m<br>3.54, m                    |
| 28  |                                       | NH 7.58                               |                                       |
| 29  | 0.97, m,<br>1.49, m                   | 2.03, m                               | 1.07, m<br>1.54, m                    |
| 30  | 0.81, t (7.0)                         | 0.92, t (7.4)                         | 0.86, t (7.0)                         |
| 31  | 0.92, d (6.5)                         | 3.90, d (11.5)<br>4.05, d (11.5)      | 0.98, d (6.0)                         |

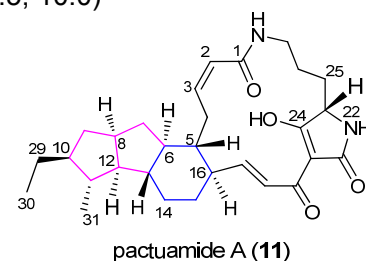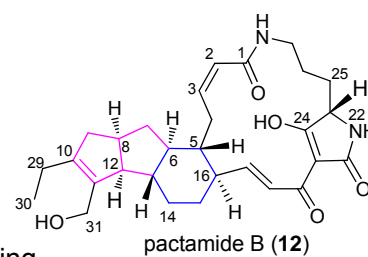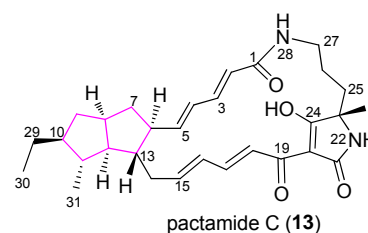<sup>a</sup>measured in 90% CDCl<sub>3</sub>/methanol-*d*<sub>4</sub>; <sup>b</sup>measured in DMSO-*d*<sub>6</sub>.

**Table S5.**  $^{13}\text{C}$  (125 MHz) NMR Data for pactamides A-C (**11-13**).

| No. | <b>11<sup>a</sup></b>      | <b>12<sup>b</sup></b>      | <b>13<sup>b</sup></b>      |
|-----|----------------------------|----------------------------|----------------------------|
|     | $\delta_{\text{C}}$ , type | $\delta_{\text{C}}$ , type | $\delta_{\text{C}}$ , type |
| 1   | 167.8, C                   | 165.5, C                   | 165.5, C                   |
| 2   | 123.3, CH                  | 124.2, CH                  | 123.9, CH                  |
| 3   | 141.7, CH                  | 139.1, CH                  | 139.1, CH                  |
| 4   | 28.9, CH <sub>2</sub>      | 28.6, CH <sub>2</sub>      | 128.6, CH                  |
| 5   | 44.6, CH                   | 43.8, CH                   | 145.4, CH                  |
| 6   | 49.6, CH                   | 46.7, CH                   | 56.7, CH                   |
| 7   | 37.4, CH <sub>2</sub>      | 38.7, CH <sub>2</sub>      | 42.2, CH <sub>2</sub>      |
| 8   | 41.5, CH                   | 37.4, CH                   | 41.0, CH                   |
| 9   | 40.7, CH <sub>2</sub>      | 41.6, CH <sub>2</sub>      | 40.1, CH <sub>2</sub>      |
| 10  | 53.9, CH                   | 136.6, C                   | 53.6, CH                   |
| 11  | 46.7, CH                   | 137.4, C                   | 46.9, CH                   |
| 12  | 58.8, CH                   | 57.6, CH                   | 60.1, CH                   |
| 13  | 53.4, CH                   | 52.3, CH                   | 51.1, CH                   |
| 14  | 30.4, CH <sub>2</sub>      | 30.5, CH <sub>2</sub>      | 39.1, CH <sub>2</sub>      |
| 15  | 32.8, CH <sub>2</sub>      | 32.0, CH <sub>2</sub>      | 139.8, CH                  |
| 16  | 45.7, CH                   | 46.3, CH                   | 133.7, CH                  |
| 17  | 147.8, CH                  | 150.7, CH                  | 138.4, CH                  |
| 18  | 128.3, CH                  | 121.4, CH                  | 129.2, CH                  |
| 19  | 183.7, C                   | 171.5, C                   | 181.4, C                   |
| 20  | 101.5, C                   | 100.6, C                   | 102.4, C                   |
| 21  | 178.2, C                   | 175.2, C                   | 177.9, C                   |
| 23  | 59.6, CH                   | 61.0, CH                   | 59.7, CH                   |
| 24  | 196.8, C                   | 195.8, C                   | 195.4, C                   |
| 25  | 25.6, CH <sub>2</sub>      | 26.1, CH <sub>2</sub>      | 27.4, CH <sub>2</sub>      |
| 26  | 20.8, CH <sub>2</sub>      | 20.4, CH <sub>2</sub>      | 22.1, CH <sub>2</sub>      |
| 27  | 38.4, CH <sub>2</sub>      | 38.0, CH <sub>2</sub>      | 38.4, CH <sub>2</sub>      |
| 29  | 26.1, CH <sub>2</sub>      | 20.9, CH <sub>2</sub>      | 26.2, CH <sub>2</sub>      |
| 30  | 12.6, CH <sub>3</sub>      | 13.0, CH <sub>3</sub>      | 12.9, CH <sub>3</sub>      |
| 31  | 19.2, CH <sub>3</sub>      | 55.9, CH <sub>2</sub>      | 19.4, CH <sub>3</sub>      |

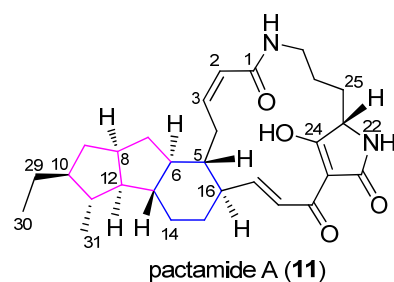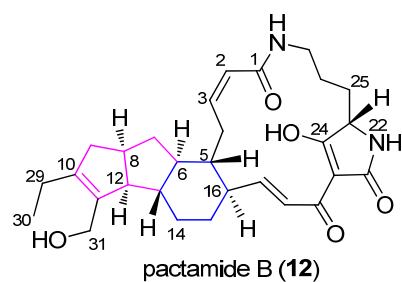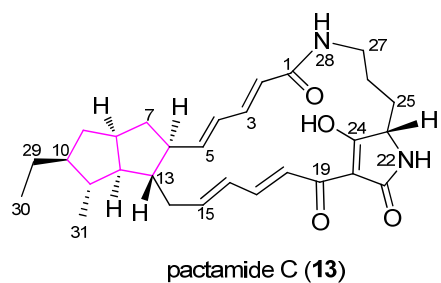

<sup>a</sup>measured in 90% CDCl<sub>3</sub>/methanol-*d*<sub>4</sub>; <sup>b</sup>measured in DMSO-*d*<sub>6</sub>.

**Table S6.**  $^1\text{H}$  NMR data for pactamides D-F (14-16).

| No.   | $14^a$                                   | $15^b$                                   | $16^a$                                   |
|-------|------------------------------------------|------------------------------------------|------------------------------------------|
|       | $\delta_{\text{H}}$ , mult. ( $J$ in Hz) | $\delta_{\text{H}}$ , mult. ( $J$ in Hz) | $\delta_{\text{H}}$ , mult. ( $J$ in Hz) |
| 2     | 5.77, d (11.0)                           | 5.92, d (15.0)                           | 5.78, d (10.5)                           |
| 3     | 5.92, dd (11.0, 10.0)                    | 6.90, dd (15.0, 11.1,)                   | 5.92, t (11.1, 10.5)                     |
| 4     | 1.90, m                                  | 6.29, dd (14.5, 11.1)                    | 1.92, m                                  |
|       | 3.39, m                                  |                                          | 3.34, m                                  |
| 5     | 1.16, m                                  | 6.38, dd (14.5, 10.5)                    | 1.25, m                                  |
| 6     | 1.45, m                                  | 6.02, dd, (15.0, 10.5)                   | 1.58, m                                  |
| 7     | 0.76, m                                  | 5.44, dd, (15.0, 8.9)                    | 0.83, m                                  |
|       | 1.98, m                                  |                                          | 1.92, m                                  |
| 8     | 2.96, br s                               | 2.93, m                                  | 2.25, m                                  |
| 9     | 5.24, br s                               | 1.12, m,                                 | 1.05, m                                  |
|       |                                          | 2.07, m,                                 | 1.92, m                                  |
| 10    |                                          | 1.36, m                                  | 1.76, m                                  |
| 11    | 2.72, br s                               | 1.39, m,                                 |                                          |
| 12    | 2.36, m                                  | 2.45, m                                  | 2.19, m                                  |
| 13    | 1.25, m                                  | 5.55, dd (15.5, 8.2)                     | 1.59, m                                  |
| 14    | 1.74, m                                  | 5.98, dd, (15.5, 10.5)                   | 1.04, m                                  |
|       | 2.15, m                                  |                                          | 1.99, m                                  |
| 15    | 1.21, m                                  | 6.46, dd, (15.0, 10.5)                   | 1.21, m                                  |
|       | 1.60, m                                  |                                          | 1.61, m                                  |
| 16    | 1.88, m                                  | 6.21, dd, (15.0, 11.5)                   | 1.92, m                                  |
| 17    | 6.22, dd (10.5, 14.5)                    | 7.06, dd (14.5, 11.5)                    | 6.25, dd (15.0, 10.0)                    |
| 18    | 7.42, d (14.5)                           | 7.50, d (14.5)                           | 7.41, d (15.0)                           |
| 22    |                                          | 7.64, s                                  |                                          |
| 23    | 3.44, m                                  | 3.52, m                                  | 3.46, m                                  |
| 25    | 1.72, m                                  | 1.77, m,                                 | 1.74, m                                  |
|       |                                          | 1.70, m                                  |                                          |
| 26    | 1.19, m                                  | 0.95, m,                                 | 1.21, m                                  |
|       | 1.25, m                                  | 1.50, m                                  | 1.26, m                                  |
| 27    | 2.33, m                                  | 2.56, m                                  | 2.32, m                                  |
|       | 3.29, m                                  | 3.49, m                                  | 3.29, m                                  |
| 28    | 7.74, br s                               | 7.74, br s                               | 7.71, br s                               |
| 29    | 1.89, m                                  | 1.14, m                                  | 1.22, m                                  |
|       | 2.22, m                                  | 1.61, m                                  | 1.40, m                                  |
| 30    | 0.97, t                                  | 0.92, t (7.4)                            | 0.83, t (7.0)                            |
| 31    | 3.54, m                                  | 0.99, d (7.4)                            | 3.51, s                                  |
|       | 3.63, m                                  |                                          |                                          |
| 10-OH |                                          |                                          | 4.33, s                                  |
| 31-OH | 4.49                                     |                                          |                                          |

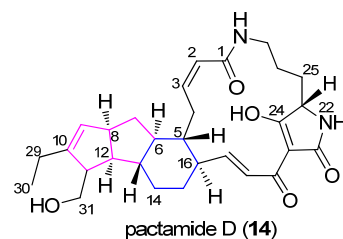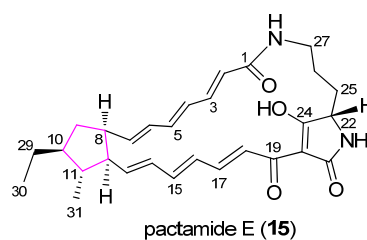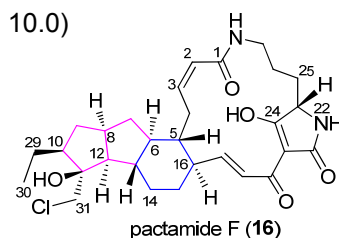<sup>a</sup>measured at 500 MHz in DMSO- $d_6$ ; <sup>b</sup>measured at 600 MHz in DMSO- $d_6$



**Table S7.**  $^{13}\text{C}$  NMR data for pactamides D-F (**14-16**).

| No. | <b>14<sup>a</sup></b>      | <b>15<sup>b</sup></b>      | <b>16<sup>a</sup></b>      |
|-----|----------------------------|----------------------------|----------------------------|
|     | $\delta_{\text{C}}$ , type | $\delta_{\text{C}}$ , type | $\delta_{\text{C}}$ , type |
| 1   | 165.5, C                   | 165.6, C                   | 165.4, C                   |
| 2   | 124.5, CH                  | 124.7, CH                  | 124.5, CH                  |
| 3   | 138.3, CH                  | 139.0, CH                  | 138.3, CH                  |
| 4   | 28.6, CH <sub>2</sub>      | 128.6, CH                  | 28.4, CH <sub>2</sub>      |
| 5   | 45.0, CH                   | 138.7, CH                  | 44.5, CH                   |
| 6   | 46.5, CH                   | 131.3, CH                  | 48.7, CH                   |
| 7   | 35.6, CH <sub>2</sub>      | 142.1, CH                  | 36.7, CH <sub>2</sub>      |
| 8   | 50.6, CH                   | 46.2, CH                   | 40.4, CH                   |
| 9   | 127.8, CH                  | 38.4, CH <sub>2</sub>      | 36.4, CH <sub>2</sub>      |
| 10  | 144.0, C                   | 49.3, CH                   | 51.1, CH                   |
| 11  | 46.8, CH                   | 45.9, CH                   | 79.4, C                    |
| 12  | 50.3, CH                   | 52.2, CH                   | 56.1, CH                   |
| 13  | 44.5, CH                   | 139.1, CH                  | 48.7, CH                   |
| 14  | 30.8, CH <sub>2</sub>      | 134.8, CH                  | 31.4, CH <sub>2</sub>      |
| 15  | 32.8, CH <sub>2</sub>      | 138.1, CH                  | 32.9, CH <sub>2</sub>      |
| 16  | 44.7, CH                   | 130.6, CH                  | 44.4, CH                   |
| 17  | 143.8, CH                  | 138.6, CH                  | 145.5, CH                  |
| 18  | 129.1, CH                  | 130.2, CH                  | 128.7, CH                  |
| 19  | 181.0, C                   | 181.2, C                   | 180.6, C                   |
| 20  | 102.0, C                   | 102.1, C                   | 101.6, C                   |
| 21  | 177.1, C                   | 177.6, C                   | 177.5, C                   |
| 23  | 59.1, CH                   | 59.7, CH                   | 59.2, CH                   |
| 24  | 195.4, C                   | 195.9, C                   | 195.1, C                   |
| 25  | 26.5, CH <sub>2</sub>      | 28.2, CH <sub>2</sub>      | 26.5, CH <sub>2</sub>      |
| 26  | 20.9, CH <sub>2</sub>      | 23.4, CH <sub>2</sub>      | 20.9, CH <sub>2</sub>      |
| 27  | 37.8, CH <sub>2</sub>      | 38.3, CH <sub>2</sub>      | 37.7, CH <sub>2</sub>      |
| 29  | 22.2, CH <sub>2</sub>      | 26.6, CH <sub>2</sub>      | 20.3, CH <sub>2</sub>      |
| 30  | 12.3, CH <sub>3</sub>      | 12.9, CH <sub>3</sub>      | 12.9, CH <sub>3</sub>      |
| 31  | 59.4, CH <sub>2</sub>      | 18.5, CH <sub>3</sub>      | 49.8, CH <sub>2</sub>      |

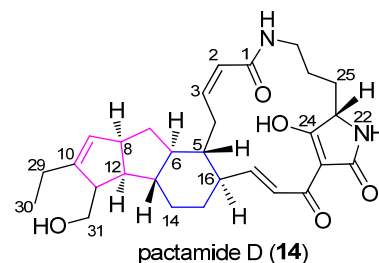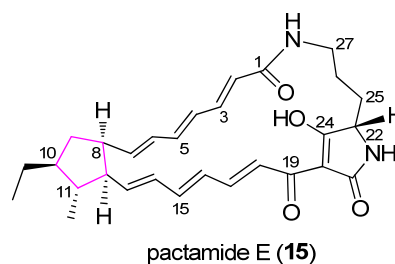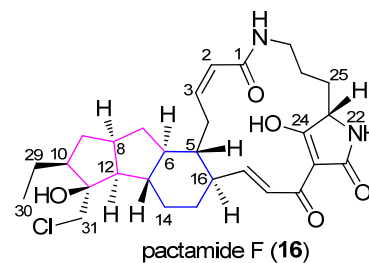

<sup>a</sup>measured at 500 MHz in DMSO-*d*<sub>6</sub>; <sup>b</sup>measured at 600 MHz in DMSO-*d*<sub>6</sub>

**Table S8.**  $^1\text{H}$  (500 MHz) and  $^{13}\text{C}$  (125 MHz) NMR data for **18**.<sup>14</sup>

| No. | <b>18</b>                                     |                            |
|-----|-----------------------------------------------|----------------------------|
|     | $\delta_{\text{H}}$ , mult. ( <i>J</i> in Hz) | $\delta_{\text{C}}$ , type |
| 1   |                                               | 174.5, C                   |
| 2   | 2.90, br d (12.0)<br>3.34, m <sup>a</sup>     | 42.9, CH <sub>2</sub>      |
| 3   | 5.41, dd (9.0, 14.5)                          | 130.8, CH                  |
| 4   | 5.29, dd (9.0, 14.5)                          | 136.4, CH                  |
| 5   | 1.81, m                                       | 53.0, CH                   |
| 6   | 2.23, m                                       | 50.2, CH                   |
| 7   | 5.50, d (10.0)                                | 133.2, CH                  |
| 8   | 5.82, d (10.0)                                | 135.4, CH                  |
| 9   | 1.53, m                                       | 49.2, CH                   |
| 10  | 1.30, m                                       | 49.2, CH                   |
| 11  | 2.23, m                                       | 35.3, CH                   |
| 12  | 0.69, m<br>2.06, m                            | 40.7, CH <sub>2</sub>      |
| 13  | 1.09, m                                       | 51.0, CH                   |
| 14  | 2.06, m                                       | 44.6, CH                   |
| 15  | 1.37, m<br>2.23, m                            | 39.4, CH <sub>2</sub>      |
| 16  | 2.46, m                                       | 51.7, CH                   |
| 17  | 6.64, br s                                    | 157.7, CH                  |
| 18  | 7.05, br s                                    | 129.4, CH                  |
| 19  |                                               | 181.3, C                   |
| 20  |                                               | 99.9, C                    |
| 21  |                                               | 187.0, C                   |
| 23  | 3.80, br s                                    | 58.3, CH                   |
| 24  |                                               | 200.0, C                   |
| 25  | 1.81, m<br>1.95, m                            | 32.0, CH <sub>2</sub>      |
| 26  | 1.09, m<br>1.53, m                            | 24.7, CH <sub>2</sub>      |
| 27  | 2.90, m<br>3.34, overlapping                  | 40.6, CH <sub>2</sub>      |
| 29  | 1.30, m<br>1.40, m                            | 23.9, CH <sub>2</sub>      |
| 30  | 0.82, d (7.0)                                 | 15.5, CH <sub>3</sub>      |
| 31  | 0.88, t (7.0, 7.0)                            | 20.0, CH <sub>3</sub>      |

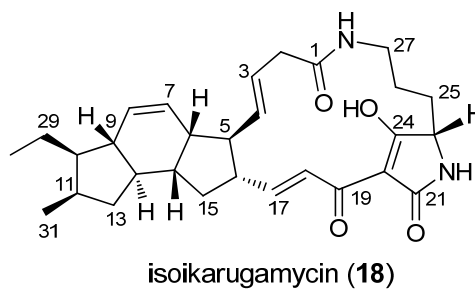

<sup>a</sup>Overlapping; measured in 90% CDCl<sub>3</sub>/methanol-*d*<sub>4</sub>; data were recorded on Bruker DRX-500 MHz.

**Fig. S1.** Scheme for inserting *ermE*\*p promoter in front of *ptmA*.

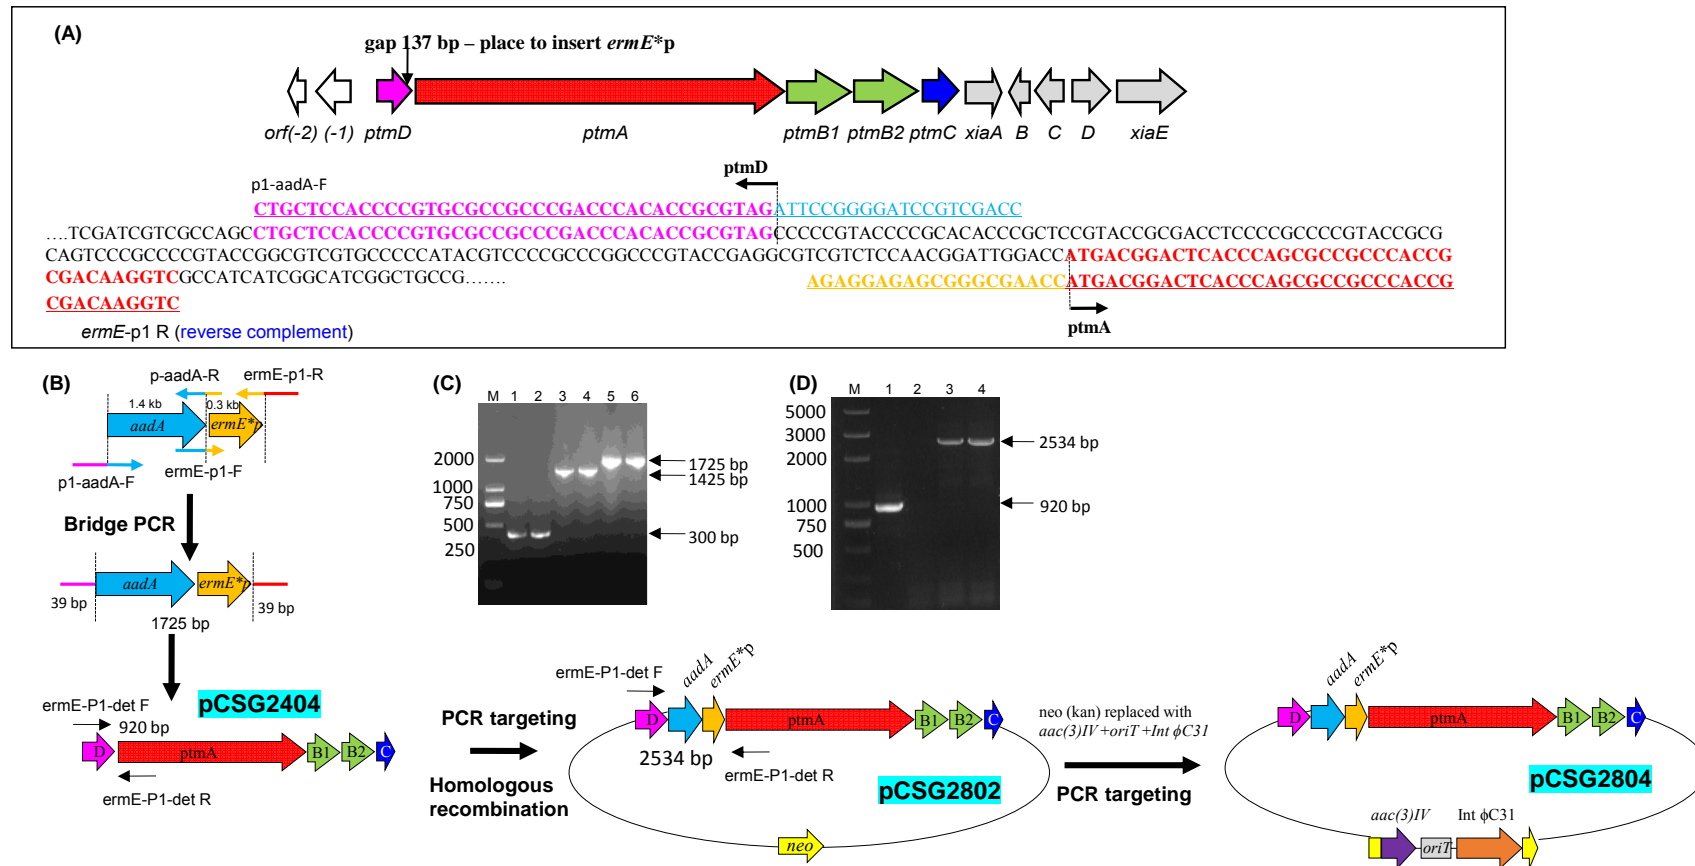

(A) the insertion of the *ermE*\*p promoter in front of *ptmA* and the design of primers used for the insertion. (B) a schematic depiction for constructing pCSG2804. (C) Gel electrophoresis of for Bridge PCR. Lane M, DNA marker D2000 (GenStar); lanes 1-2, 300 bp *ermE*\*p promoter from pPWW50A; lanes 3-4, 1425 bp *aadA* from pIJ773; lanes 5-6, 1725 bp fragment containing *ermE*\*p and *aadA* by bridge PCR. (D) Gel electrophoresis of PCR products for proofing of promoter insertion in front of *ptmA* using detection primers ermE-P1-det F and R. Lane M, DNA marker D2000; lane 1, pCSG2404 as a template; lanes 2-3, pCSG2802 as a template. The cosmid pCSG2804 was selected by the phenotype as Apr<sup>R</sup>/Neo<sup>S</sup>.

**Fig. S2.** Scheme for inserting *ermE*\*p promoter in front of *ptmD*.

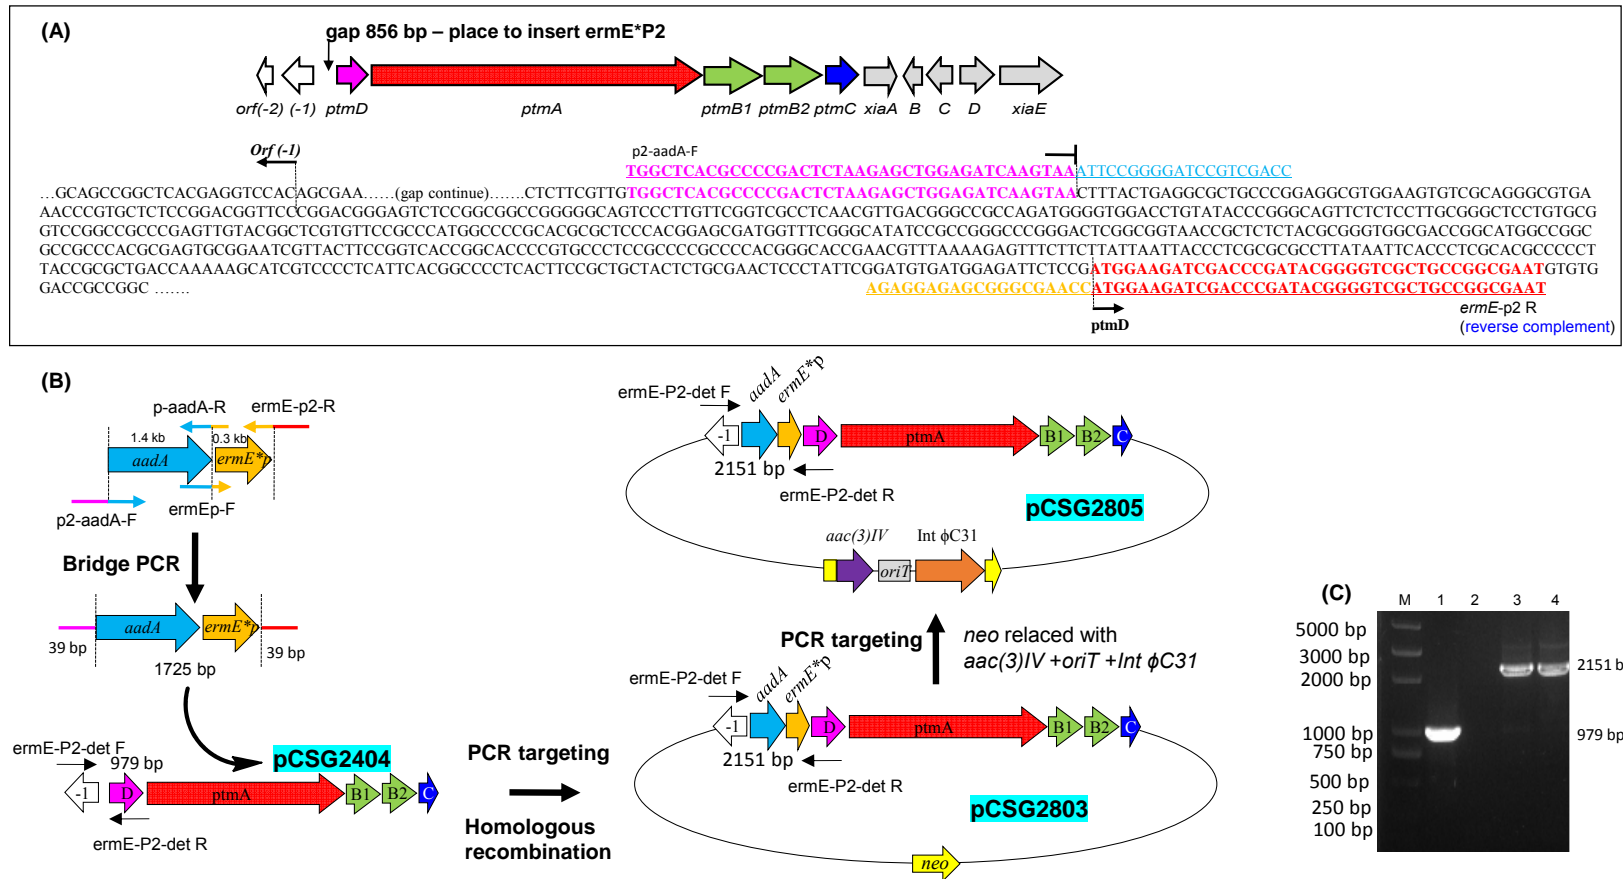

(A) the insertion of the *ermE*\*p promoter in front of *ptmD* and the design of primers used for the insertion. (B) a schematic depiction for constructing pCSG2805. (D) Gel electrophoresis of PCR products for proofing of promoter insertion in front of *ptmD* using detection primers *ermE*-P2-det F and R. Lane M, DNA marker D2000; lane 1, pCSG2404 as a template; lanes 2-3, pCSG2803 as a template. The cosmid pCSG2805 was selected by the phenotype as Apr<sup>R</sup>/Neo<sup>S</sup>.

**Fig. S3.** In-frame deletion of *ptmC* with *ermE*\*p promoter inserted in front of *ptmA*.

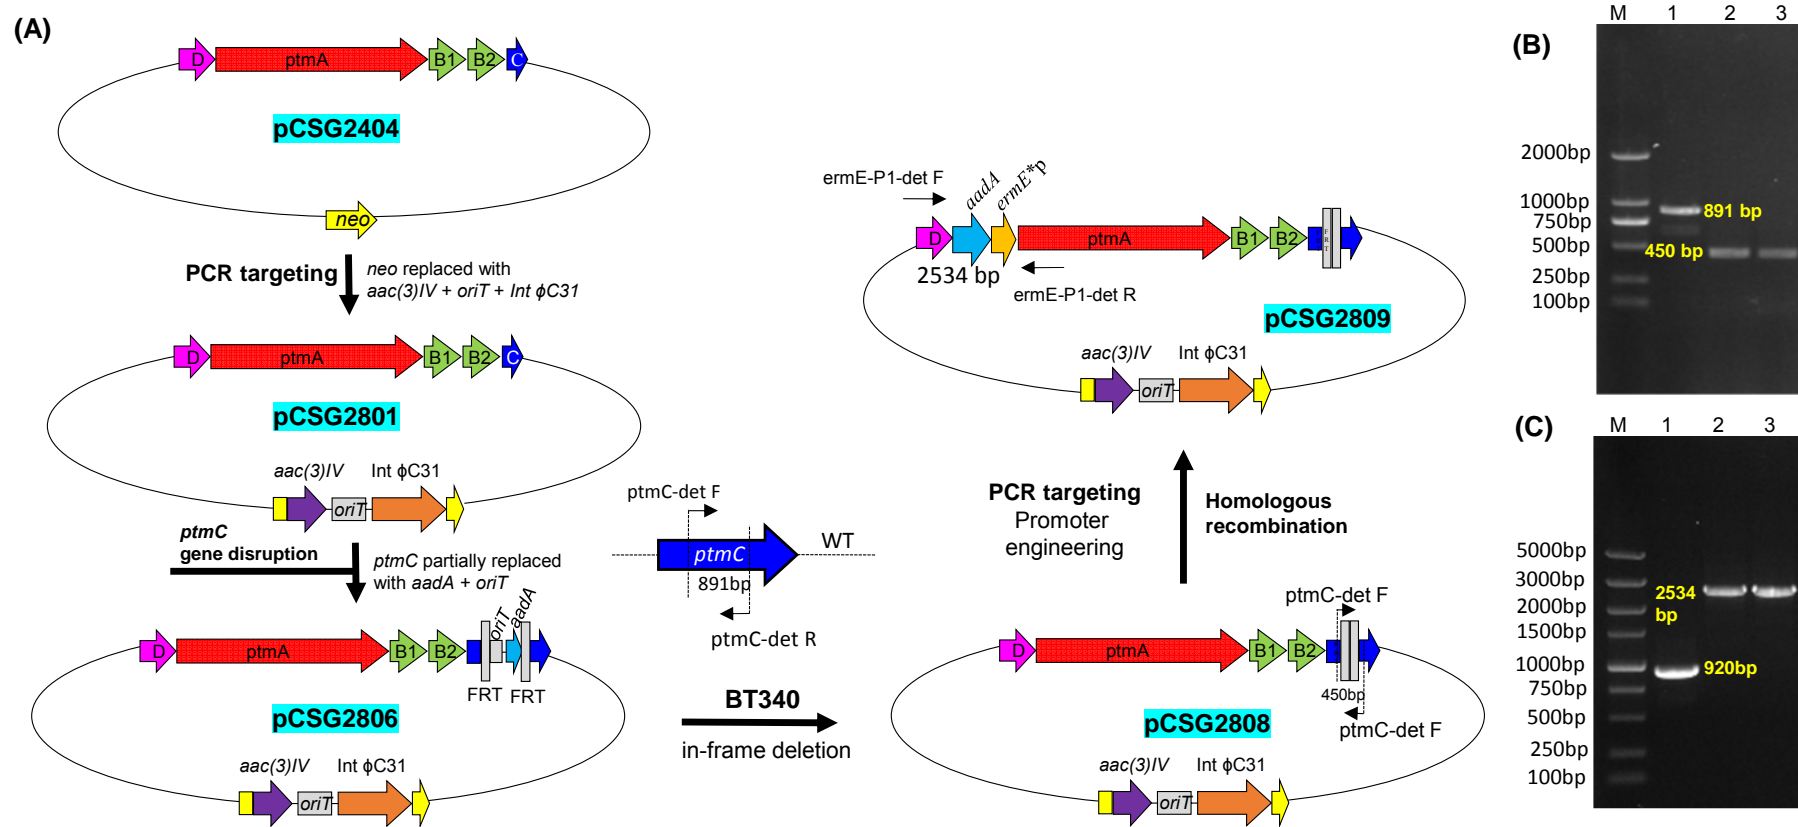

(A) a schematic depiction for constructing pCSG2809 where *ptmC* was disrupted by in-frame deletion and the *ermE*\*p promoter was inserted in front of *ptmA*. (B) Gel electrophoresis of PCR products for proofing pCSG2808. Lane M, DNA marker D2000; lane 1, pCSG2404 as a template using primers *ptmC*-det F and R; lanes 2-3, pCSG2808 as a template. (C) Gel electrophoresis of PCR products for proofing promoter insertion in pCSG2809. Lane M, DNA marker D5000; lane 1, pCSG2404 as a template using primers *ermE*-P1-det F and R; lanes 2-3, pCSG2809 as a template. The cosmid pCSG2809 was selected by the phenotype as  $Apr^R/Neo^S$

**Fig. S4.** In-frame deletion of *ptmB1* with *ermE*\*p promoter inserted in front of *ptmA*.

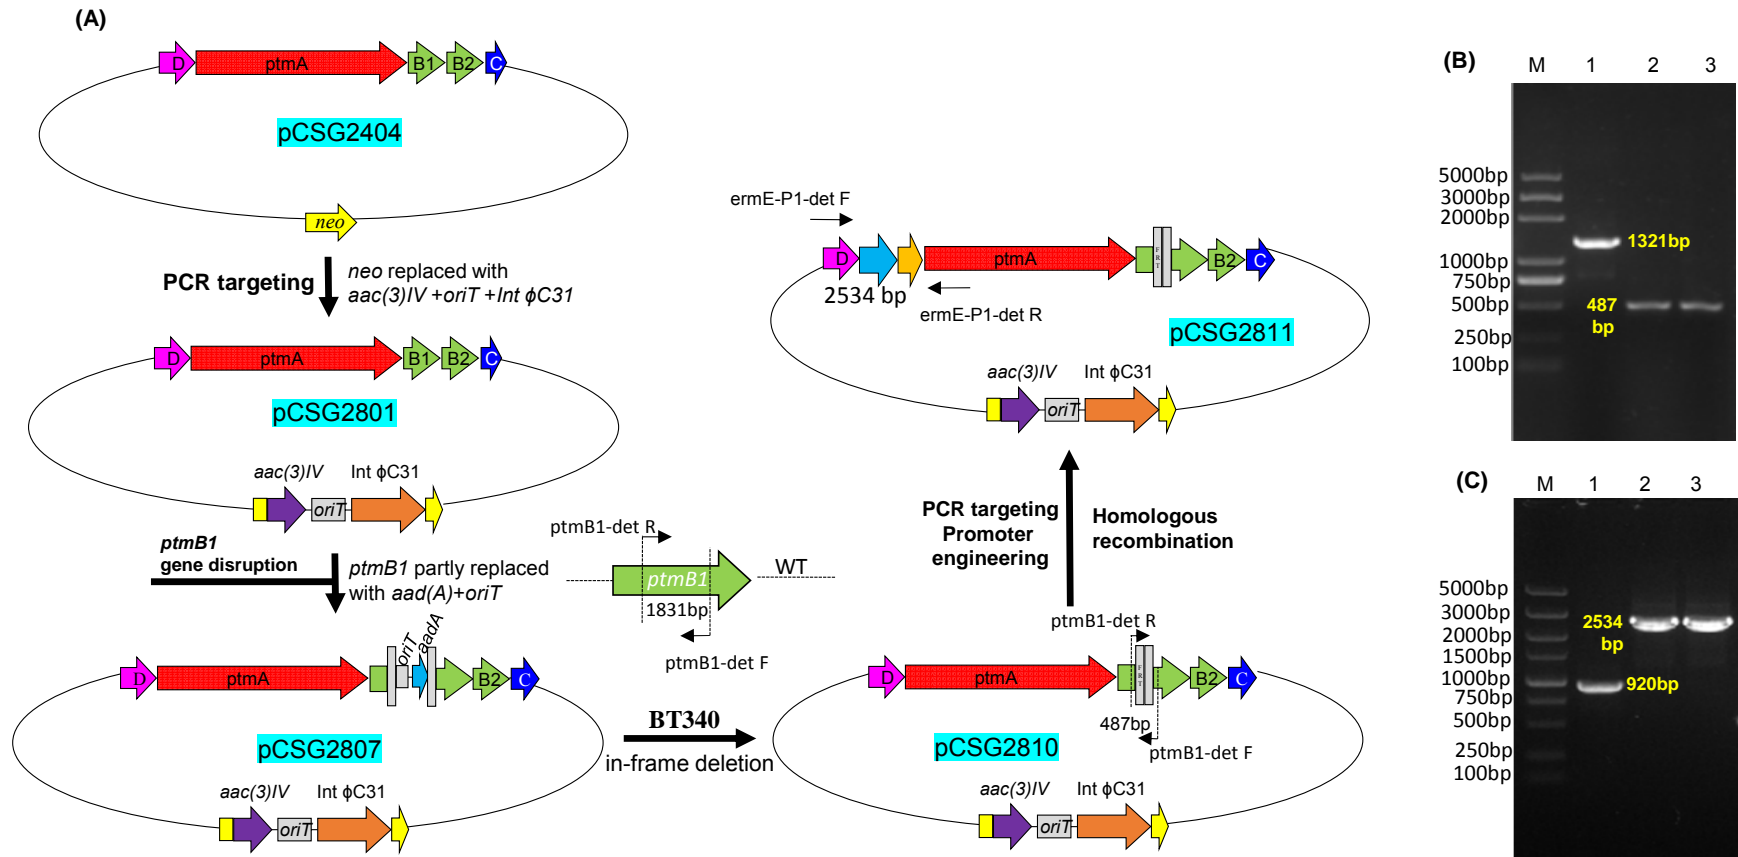

(A) a schematic depiction for constructing pCSG2811 where *ptmB1* was disrupted by in-frame deletion and the *ermE*\*p promoter was inserted in front of *ptmA*. (B) Gel electrophoresis of PCR products for proofing pCSG2810. Lane M, DNA marker D2000 plus; lane 1, pCSG2404 as a template using primers *ptmB1*-det F and R; lanes 2-3, pCSG2810 as a template. (C) Gel electrophoresis of PCR products for proofing promoter insertion in pCSG2811. Lane M, DNA marker D5000; lane 1, pCSG2404 as a template using primers *ermE*-P1-det F and R; lanes 2-3, pCSG2811 as a template. The cosmid pCSG2811 was selected by the phenotype as *Apr*<sup>R</sup>/*Neo*<sup>S</sup>

**Fig. S5.** In-frame deletion of *ptmB2* with *ermE*\*p promoter inserted in front of *ptmA*.

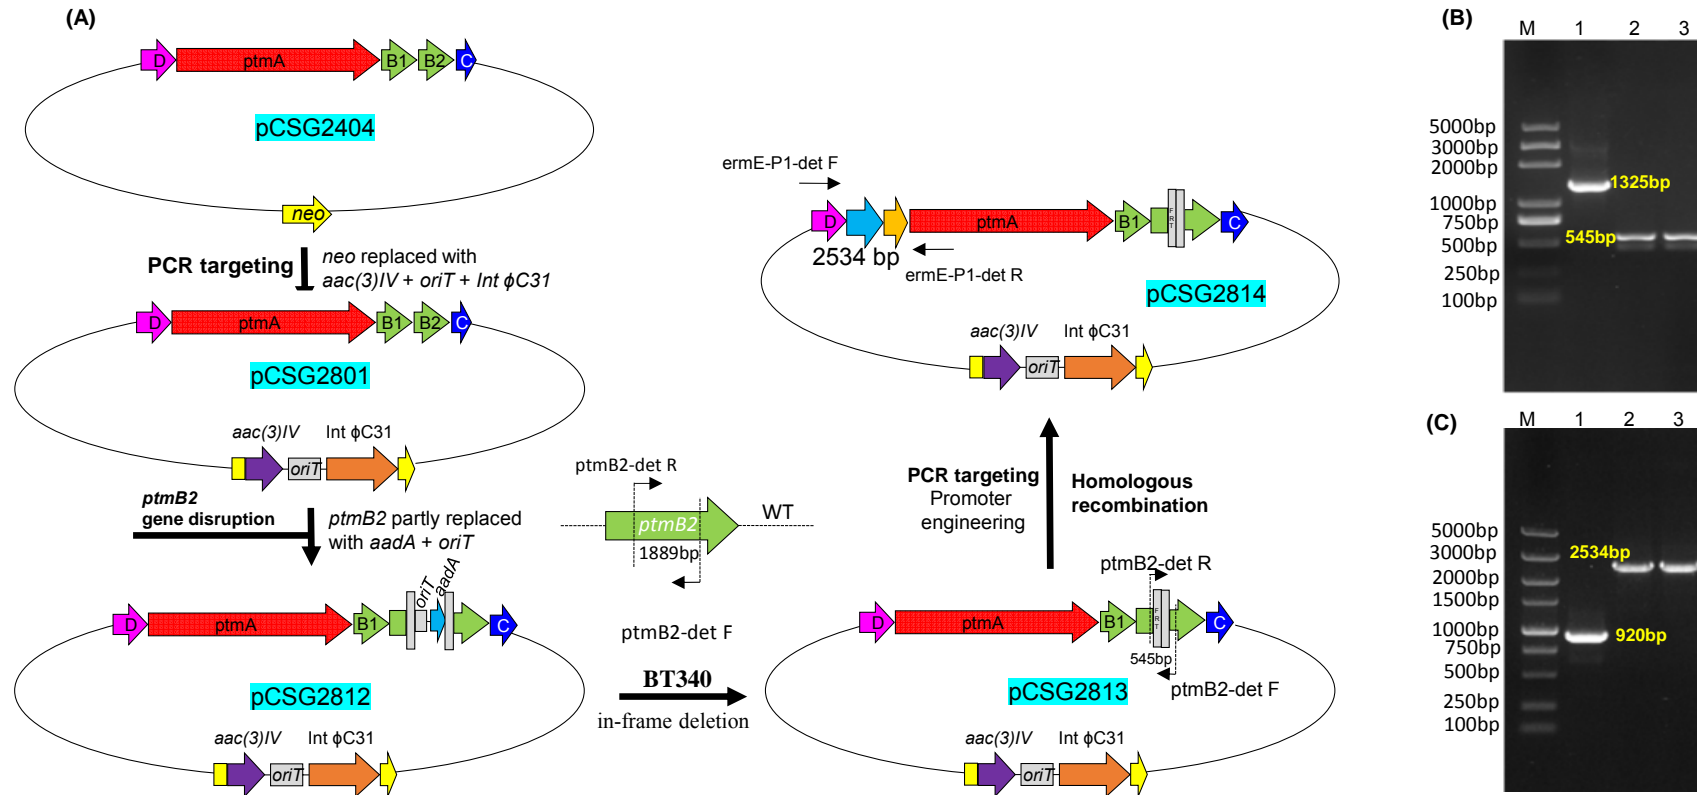

(A) a schematic depiction for constructing pCSG2814 where *ptmB2* was disrupted by in-frame deletion and the *ermE*\*p promoter was inserted in front of *ptmA*. (B) Gel electrophoresis of PCR products for proofing pCSG2813. Lane M, DNA marker D2000 plus; lane 1, pCSG2404 as a template using primers *ptmB2*-det F and R; lanes 2-3, pCSG2813 as a template. (C) Gel electrophoresis of PCR products for proofing promoter insertion in pCSG2814. Lane M, DNA marker D5000; lane 1, pCSG2404 as a template using primers *ermE*-P1-det F and R; lanes 2-3, pCSG2814 as a template. The cosmid pCSG2814 was selected by the phenotype as Apr<sup>R</sup>/Neo<sup>S</sup>

**Fig. S6.** Characterization of compound **10** produced by *S. lividans* TK64/pCSG2814.

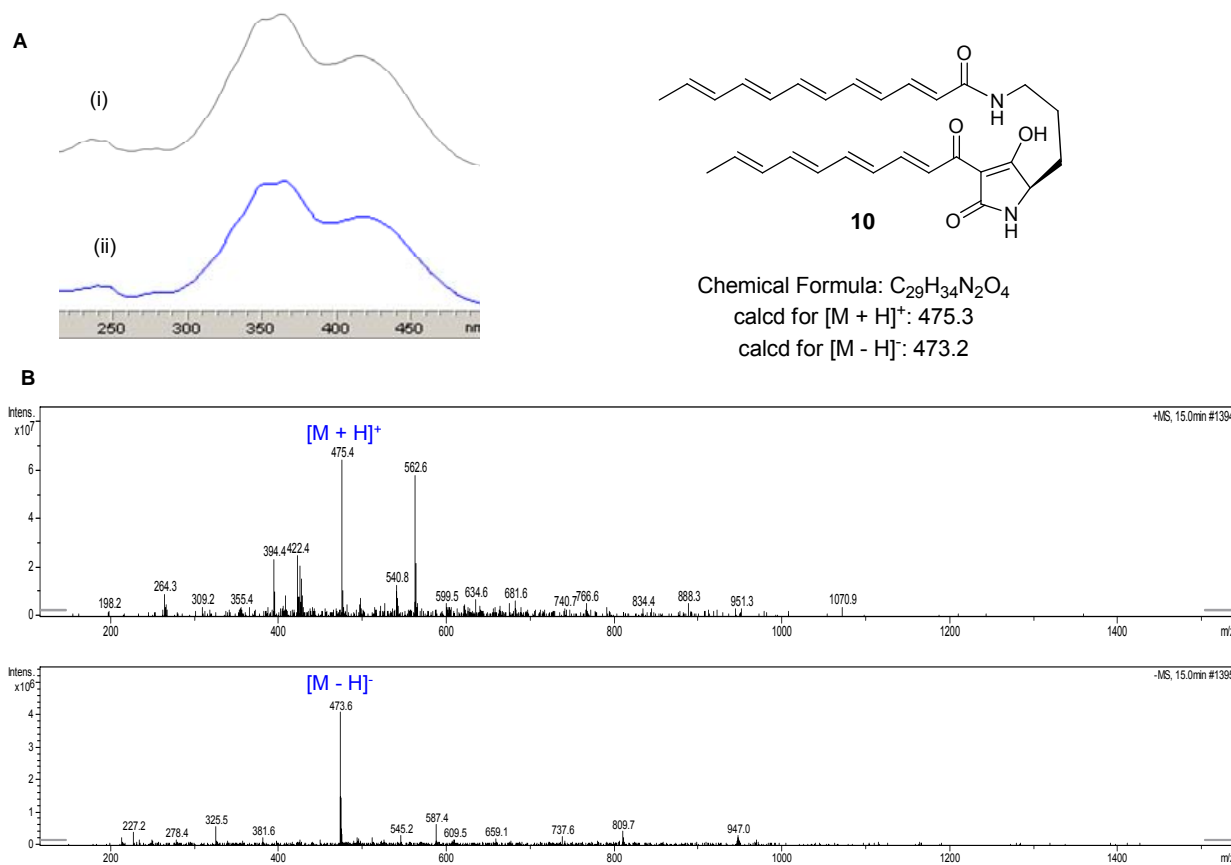

(A) comparison of UV spectra of compound **10** from (i) the  $\Delta$ *ikaB* mutant of *Streptomyces* sp. ZJ306<sup>8</sup> and (ii) *S. pactum* 2999PTMp1. (B) the LC-MS data of compound **10** from *S. lividans* TK64/pCSG2814.



**Fig. S7.** Spectral data for pactamide A (**11**).

(A) HRESIMS.

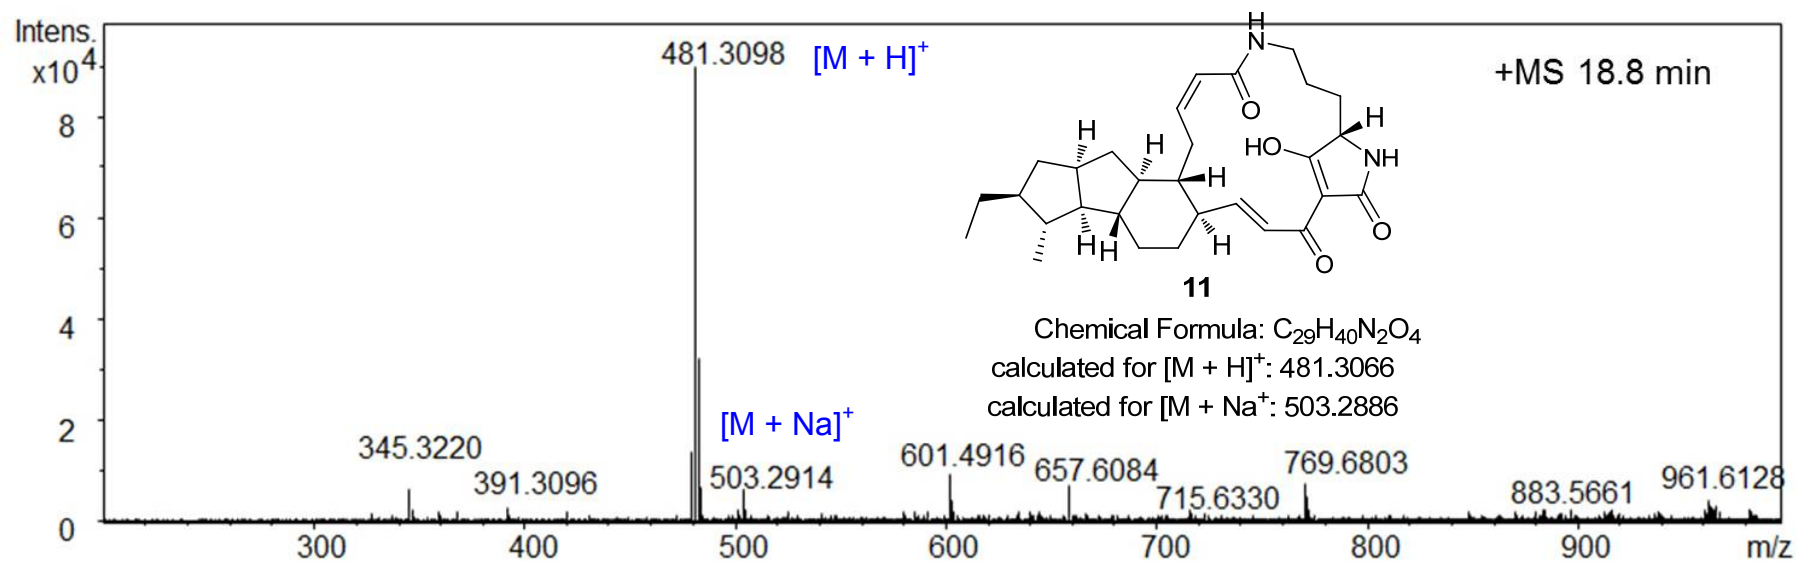

**Fig. S7.** Spectral data for pactamide A (**11**) (continued).  
**(B)**  $^1\text{H}$  NMR spectrum of pactamide A (**11**) in  $\text{CDCl}_3/\text{CD}_3\text{OD}$  (9:1).

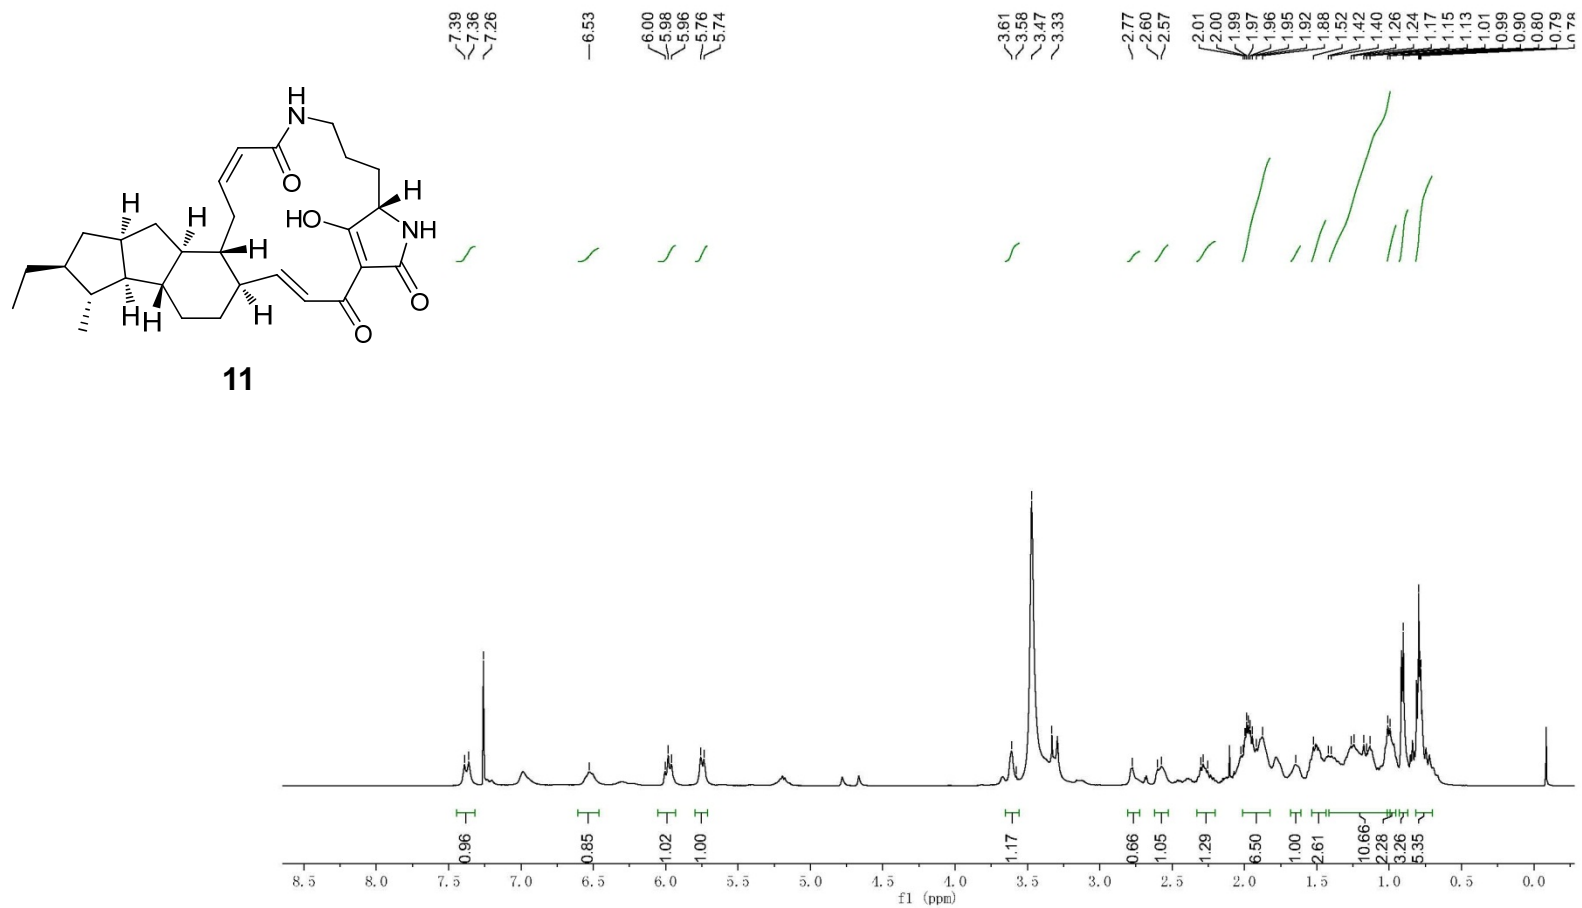

**Fig. S7.** Spectral data for pactamide A (**11**) (continued).  
**(C)** The  $^{13}\text{C}$  NMR spectrum of pactamide A (**11**) in  $\text{CDCl}_3/\text{CD}_3\text{OD}$  (9:1).

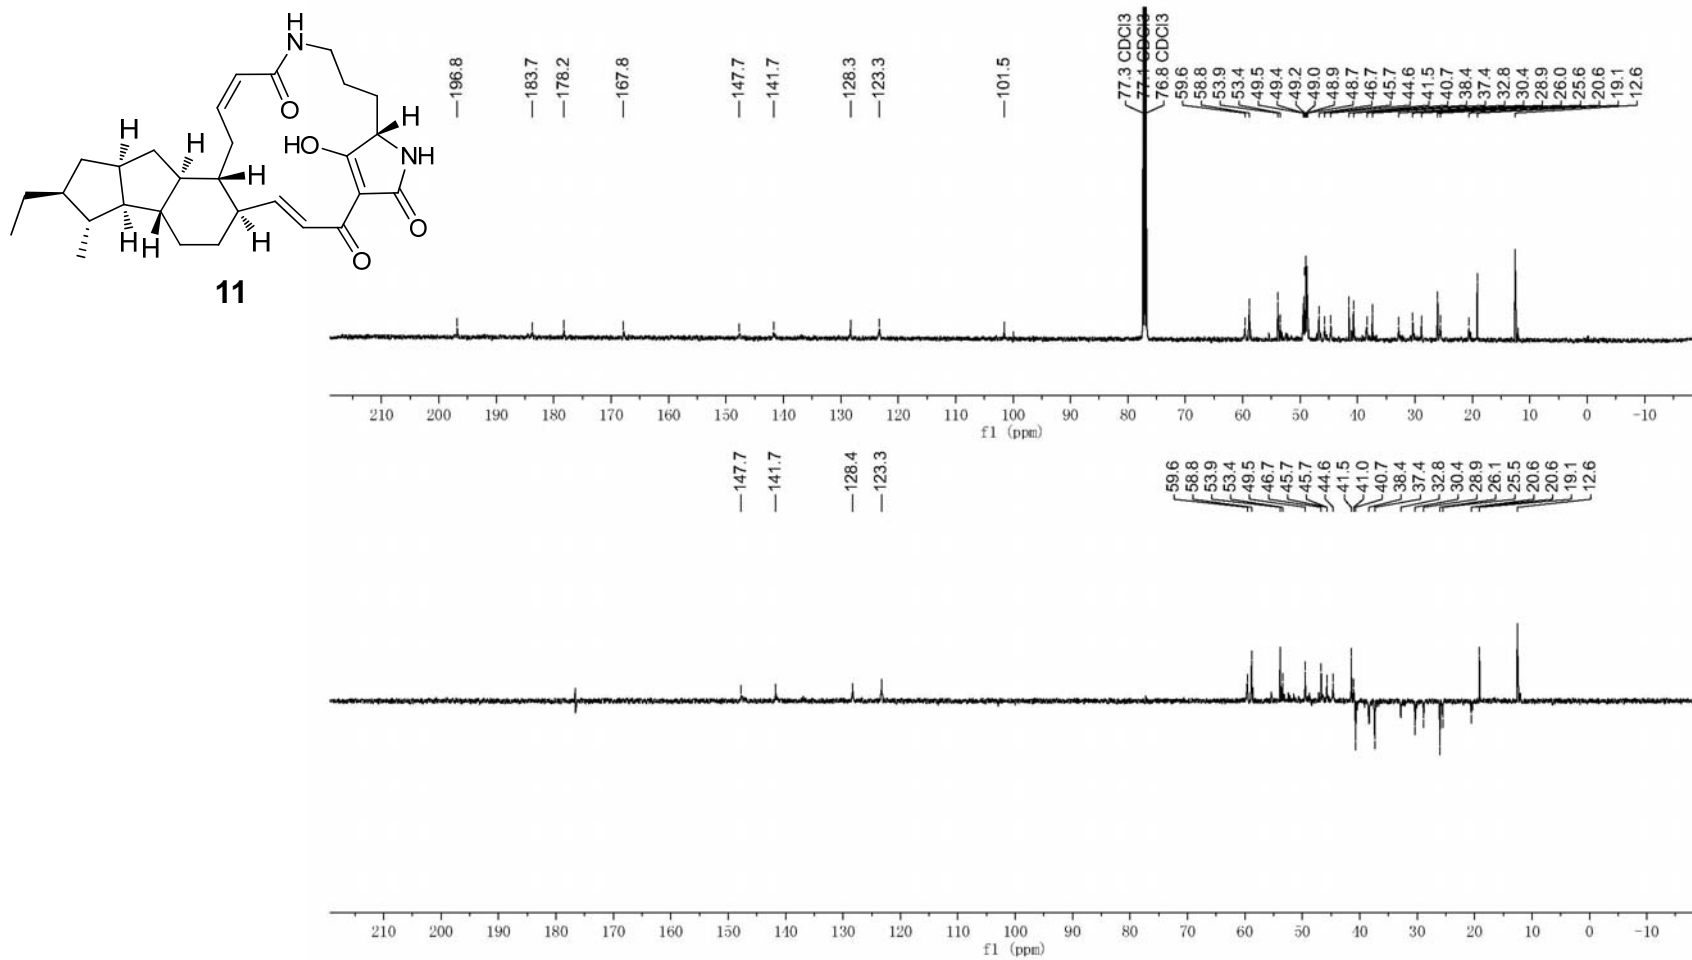

**Fig. S7.** Spectral data for pactamide A (**11**) (continued).  
**(D)** The HSQC spectrum of pactamide A (**11**) in CDCl<sub>3</sub>/CD<sub>3</sub>OD (9:1).

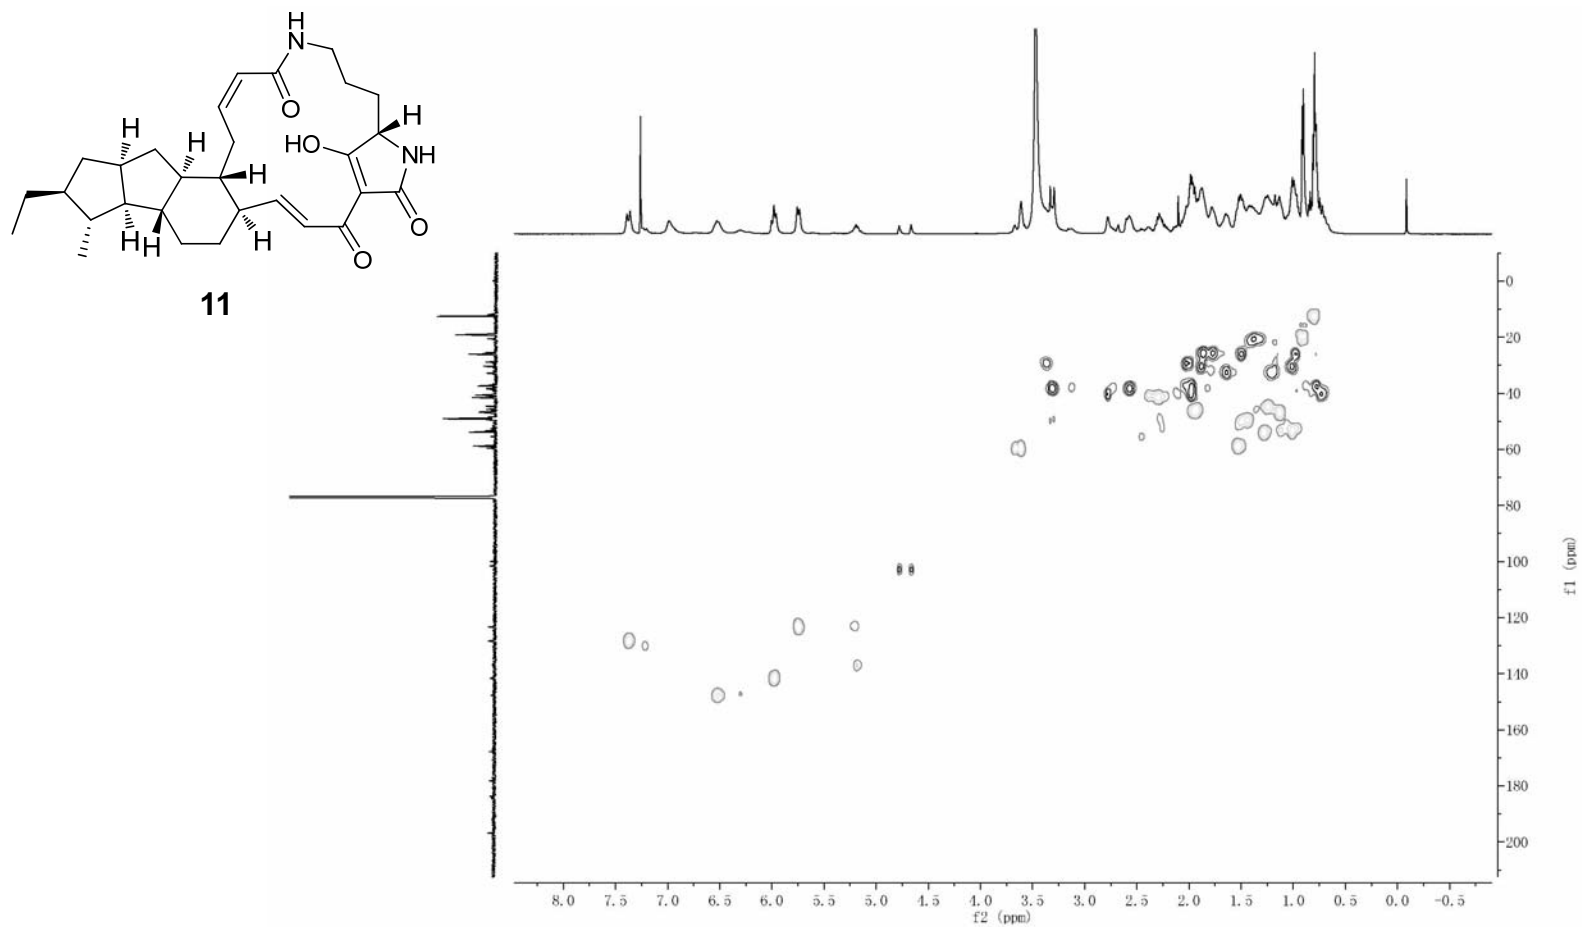

**Fig. S7.** Spectral data for pactamide A (**11**) (continued).  
**(E)** The HMBC spectrum of pactamide A (**11**) in CDCl<sub>3</sub>/CD<sub>3</sub>OD (9:1).

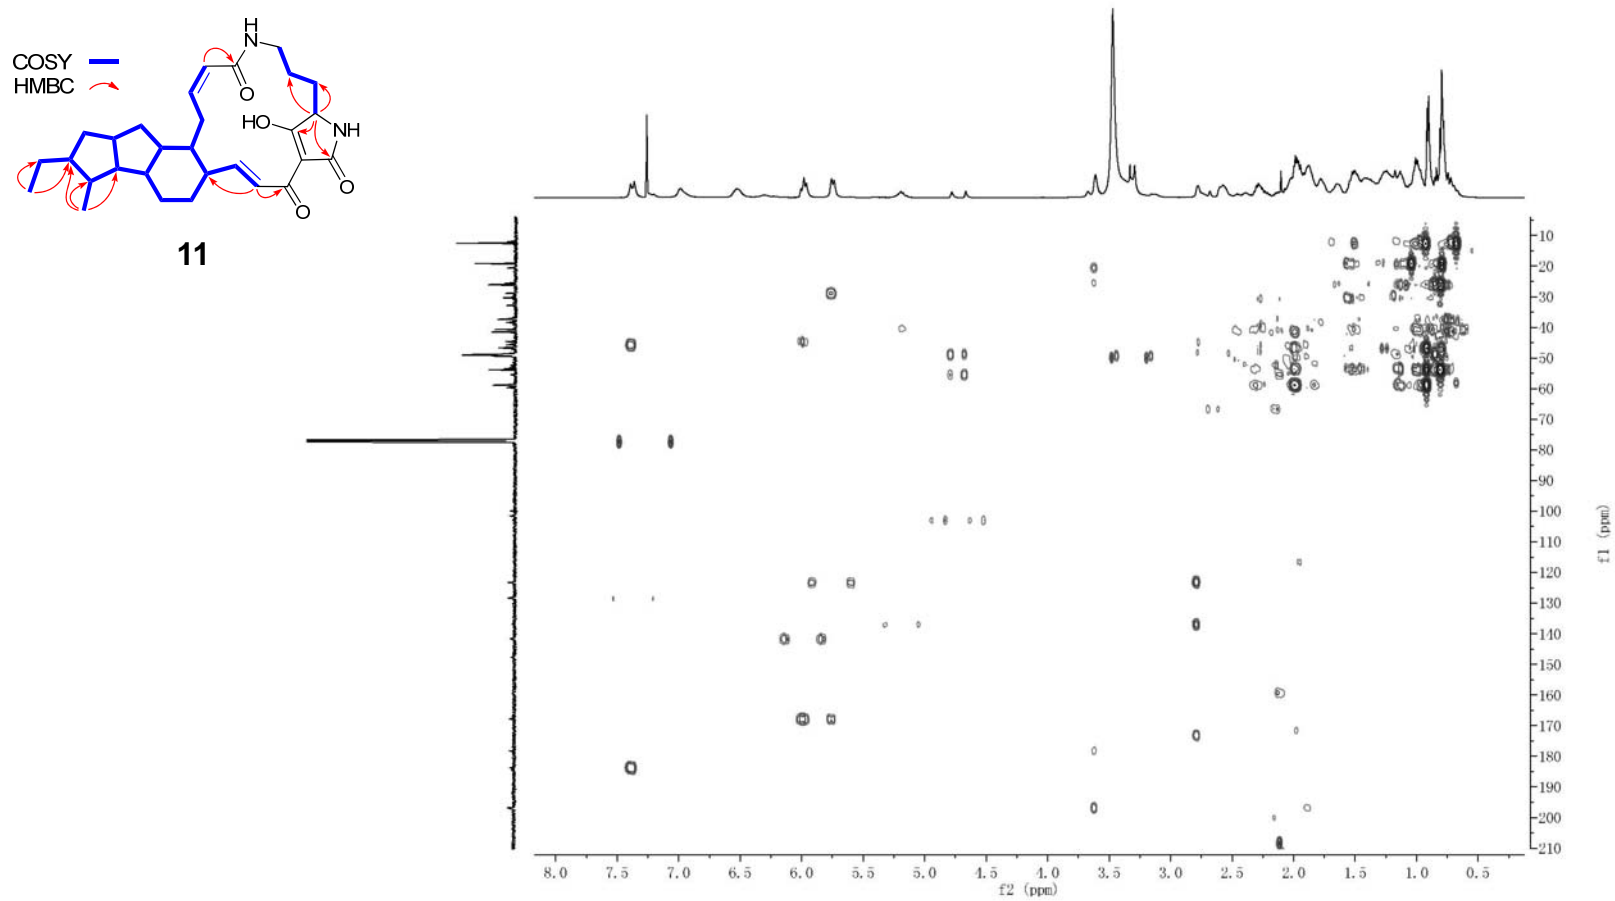

**Fig. S7.** Spectral data for pactamide A (**11**) (continued).  
**(F)** The COSY spectrum of pactamide A (**11**) in CDCl<sub>3</sub>/CD<sub>3</sub>OD (9:1).

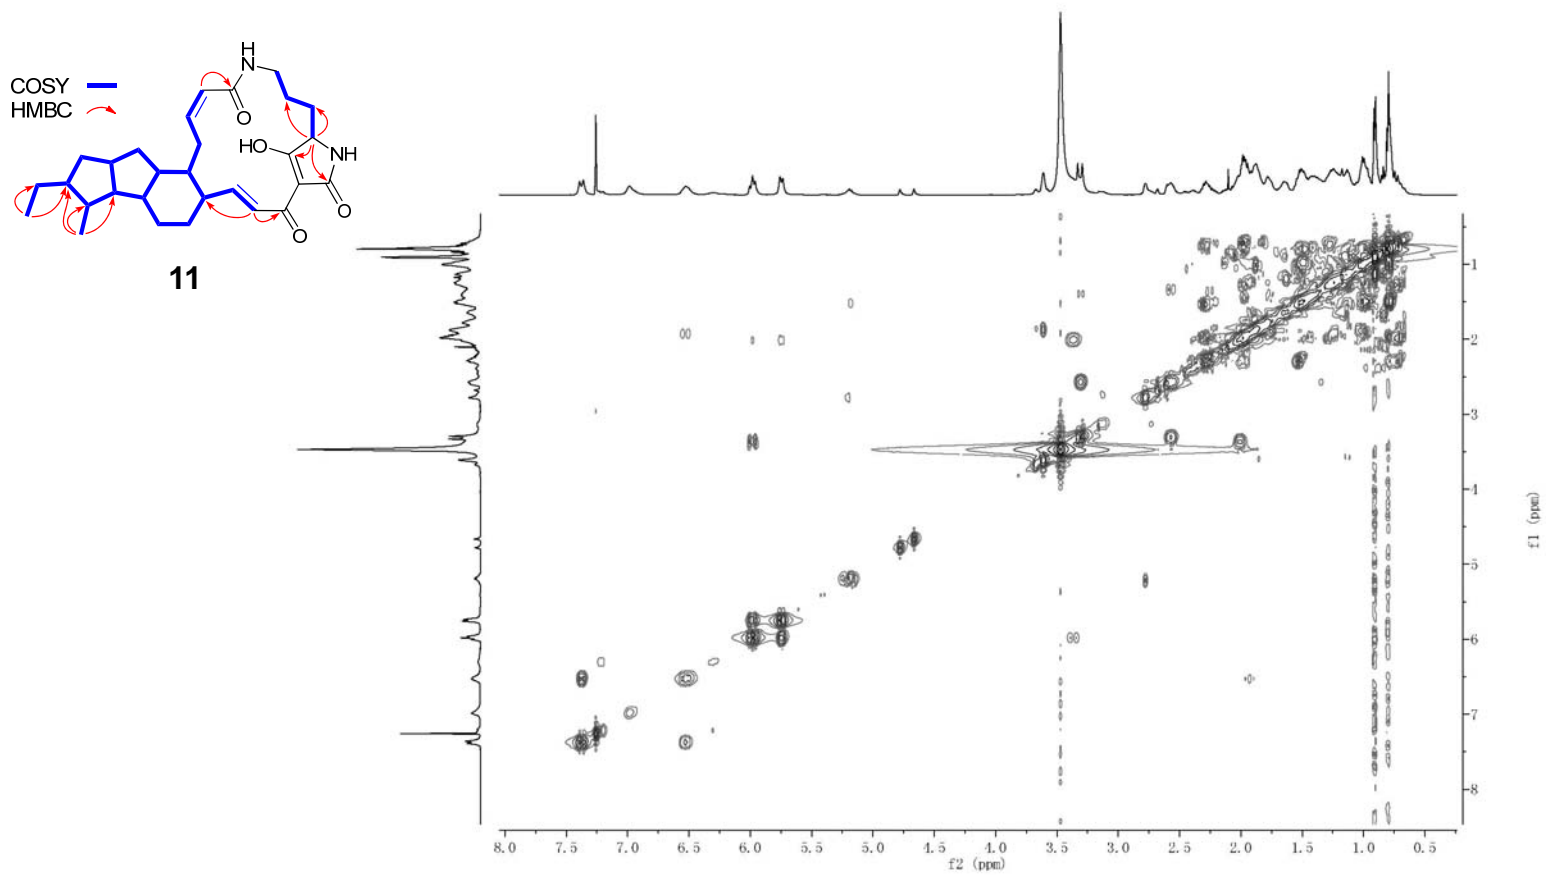

**Fig. S7.** Spectral data for pactamide A (**11**) (continued).  
**(G)** The NOESY spectrum of pactamide A (**11**) in CDCl<sub>3</sub>/CD<sub>3</sub>OD (9:1).

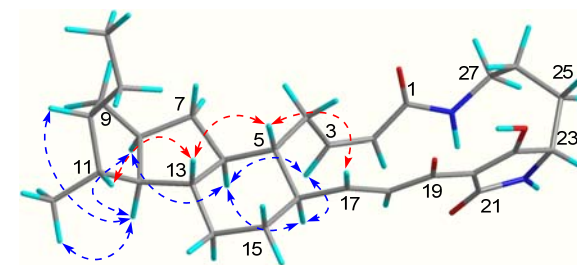

**11**

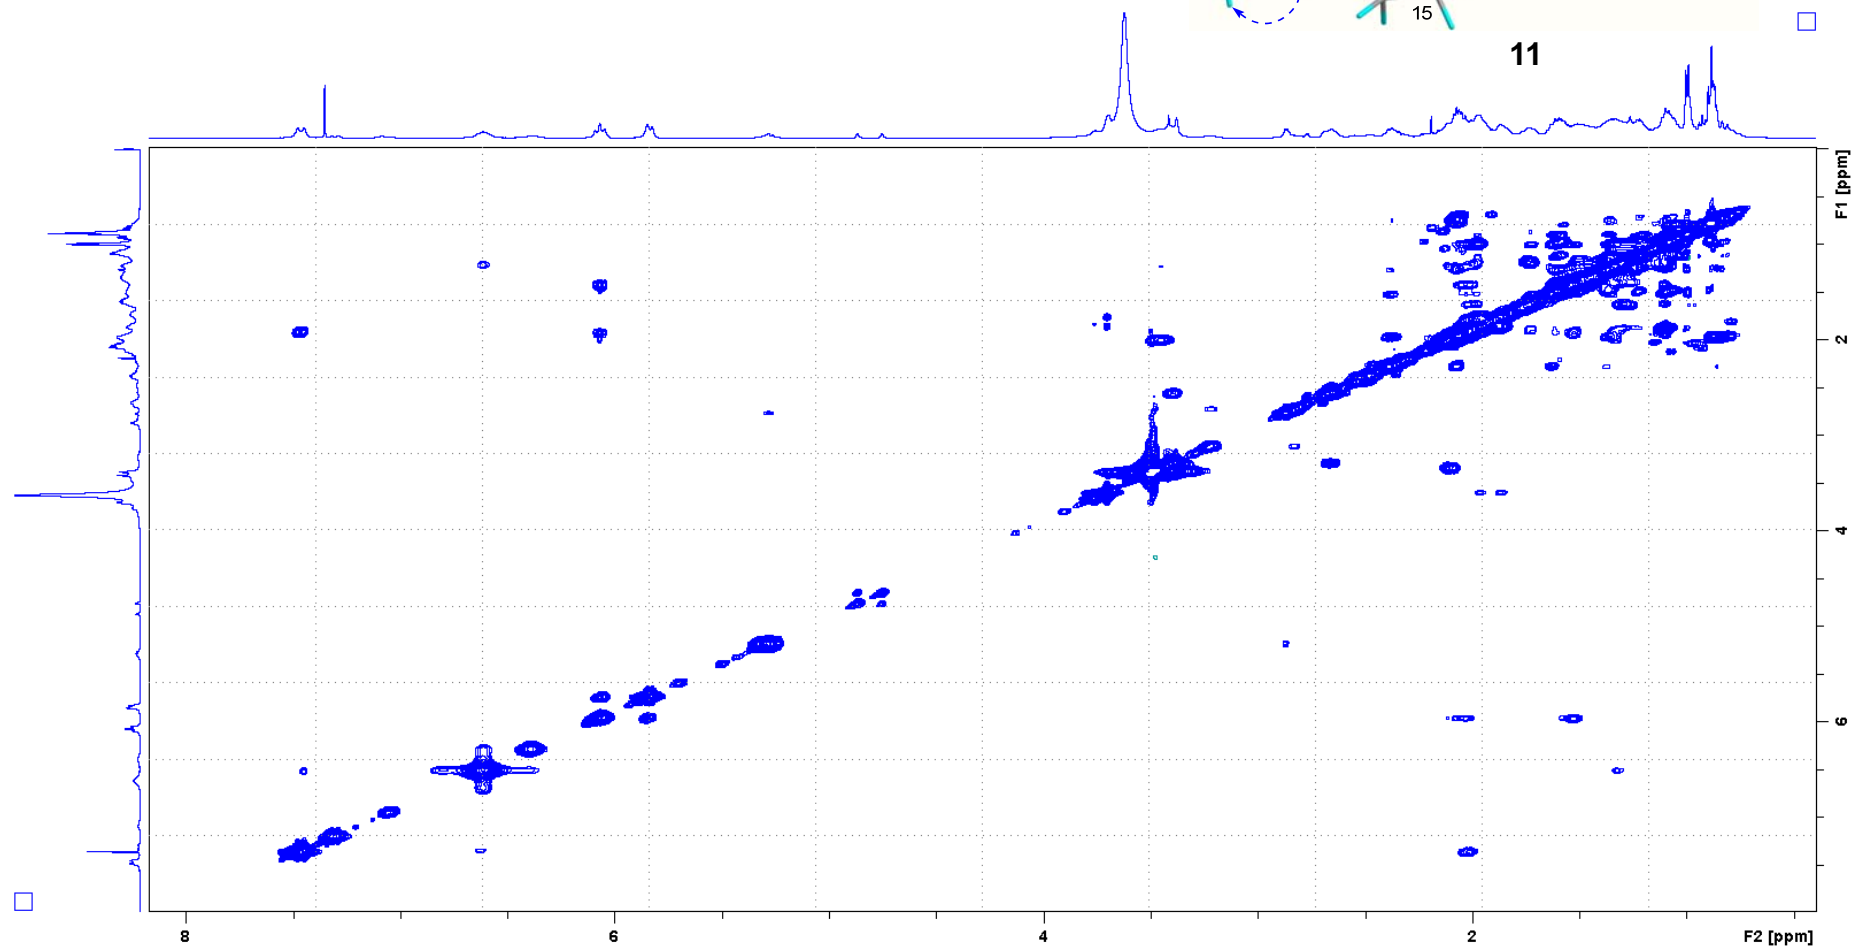

**Fig. S7.** Spectral data for pactamide A (**11**) (continued).  
**(H)** The NOESY spectrum of pactamide A (**11**) in CDCl<sub>3</sub>/CD<sub>3</sub>OD (9:1).

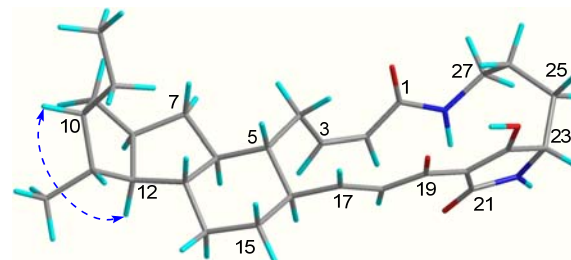

**11**

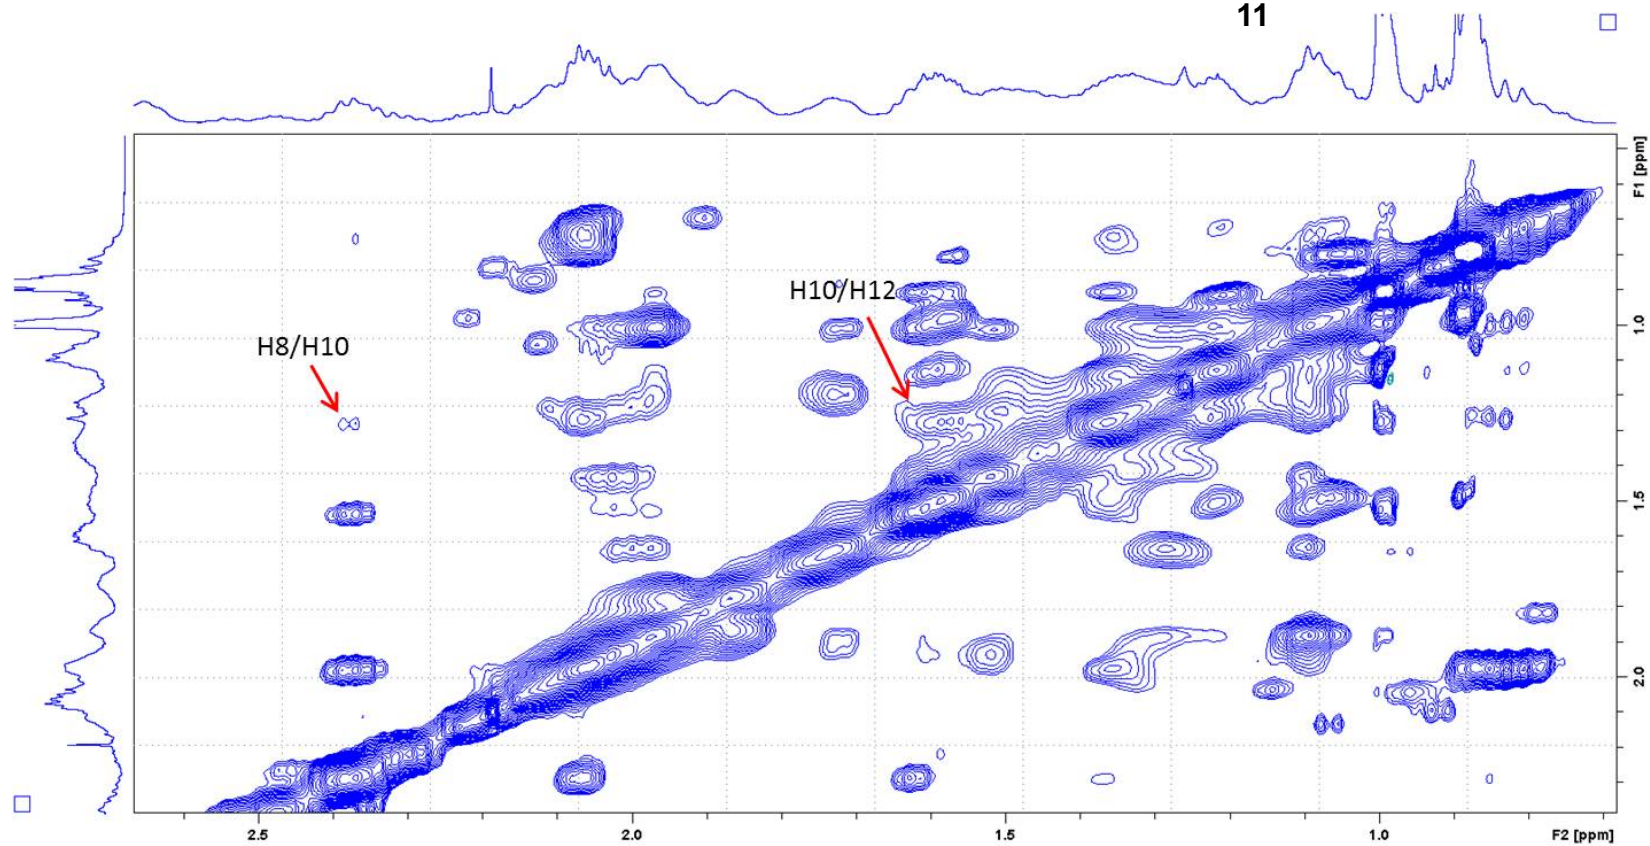



**Fig. S8.** Comparison of ECD spectra of pactamides, lysobacteramide B (**4**) and HSAF.

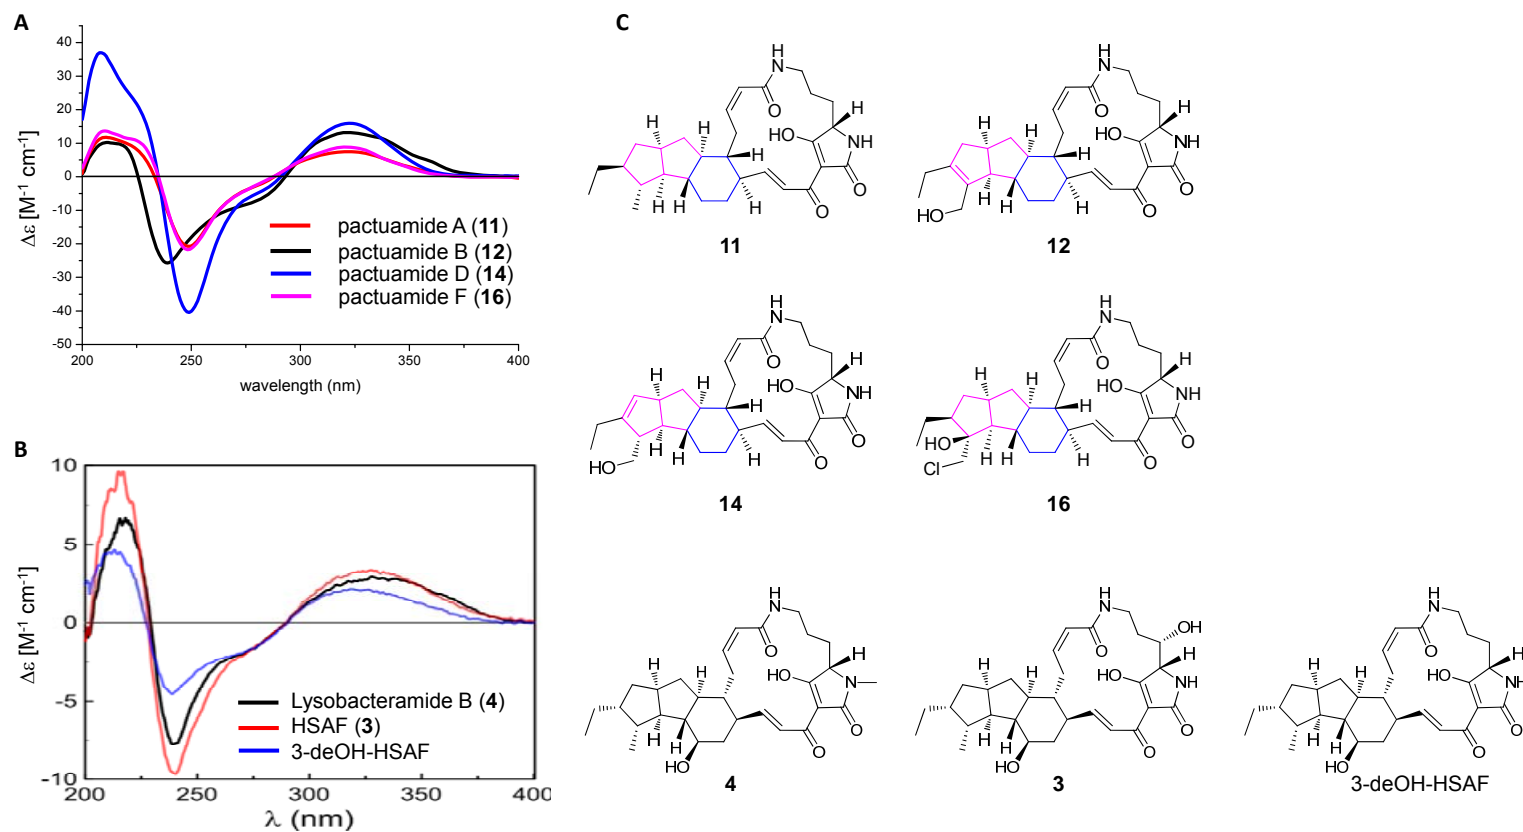

(A) ECD spectra measured for pactamides A (**11**), B (**12**), D (**14**) and F (**16**); (B) ECD spectra of lysobacteramide B (**4**), HSAF (**3**) and 3-deOH-HSAF from reference.<sup>6</sup> (C) Chemical structures.

**Fig. S9.** Spectral data for pactamide B (**12**).

(A) HRESIMS.

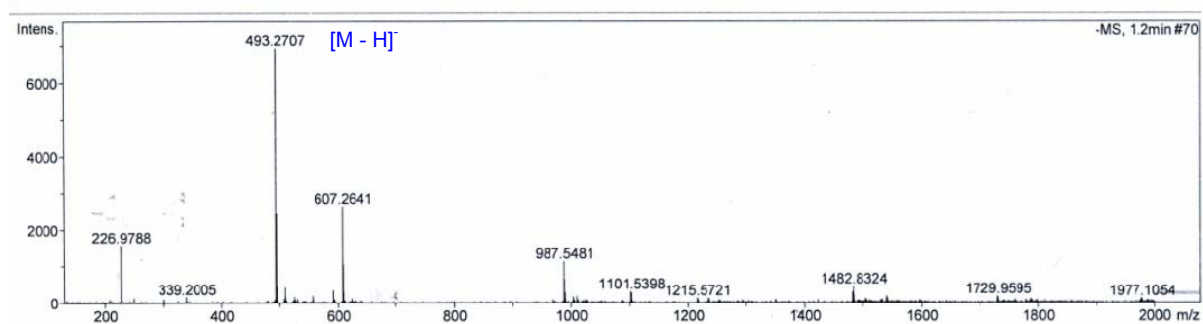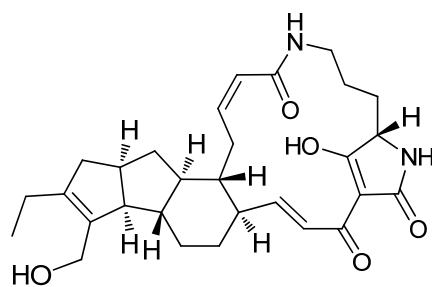

**12**

Chemical Formula:  $C_{29}H_{38}N_2O_5$   
calculated for  $[M - H]^-$ : 493.2702

**Fig. S9.** Spectral data for pactamide B (**12**) (continued).  
**(B)** The  $^1\text{H}$  NMR spectrum of pactamide B (**12**) in  $\text{DMSO-}d_6$ .

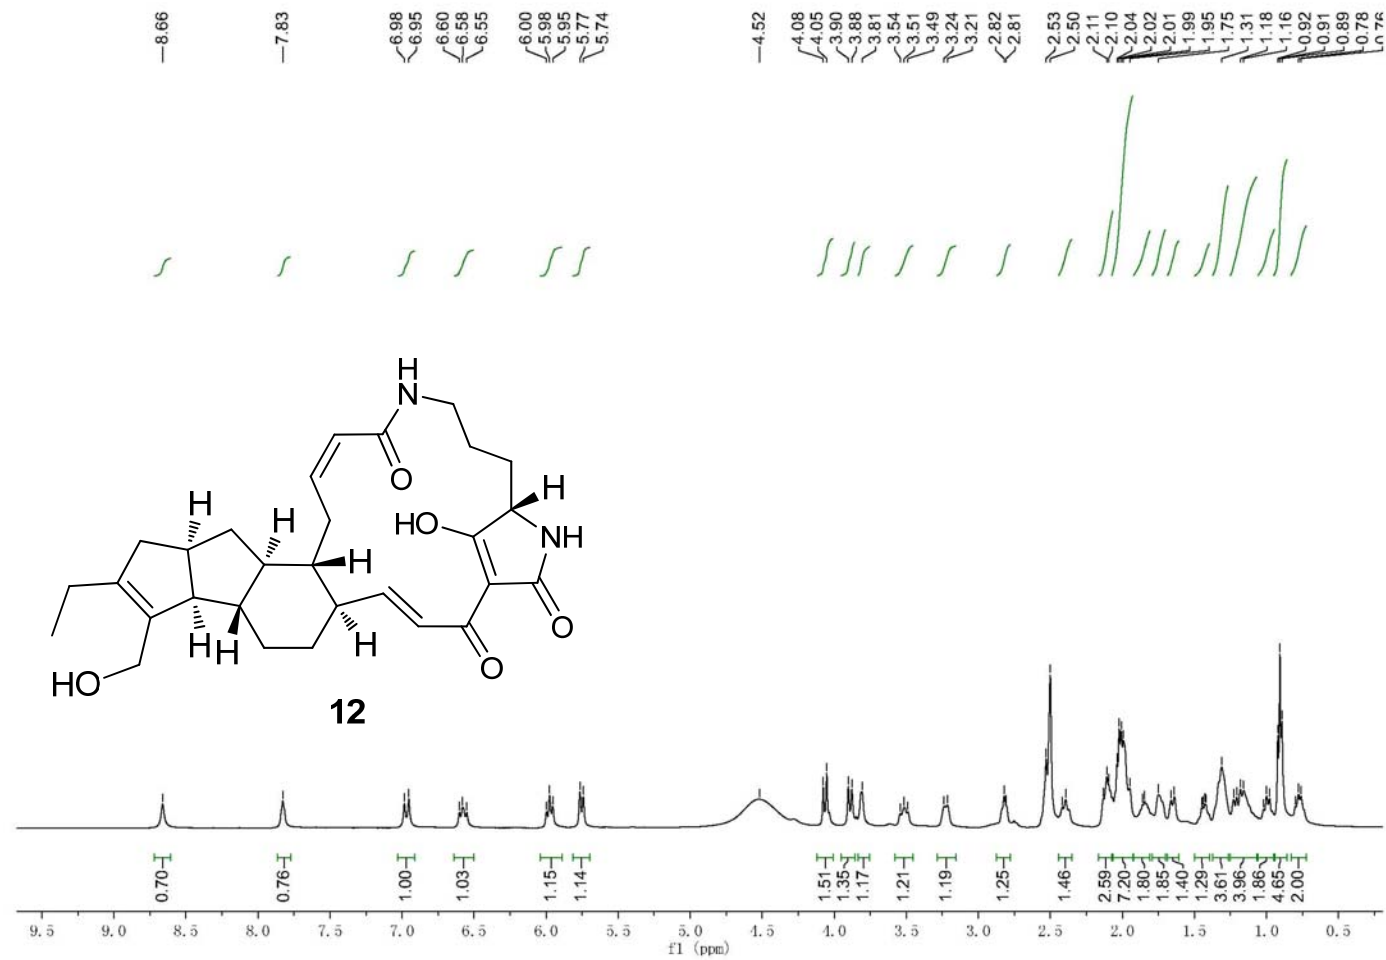

**Fig. S9.** Spectral data for pactamide B (**12**) (continued).  
**(C)** The  $^{13}\text{C}$  NMR spectrum of pactamide B (**12**) in  $\text{DMSO-}d_6$ .

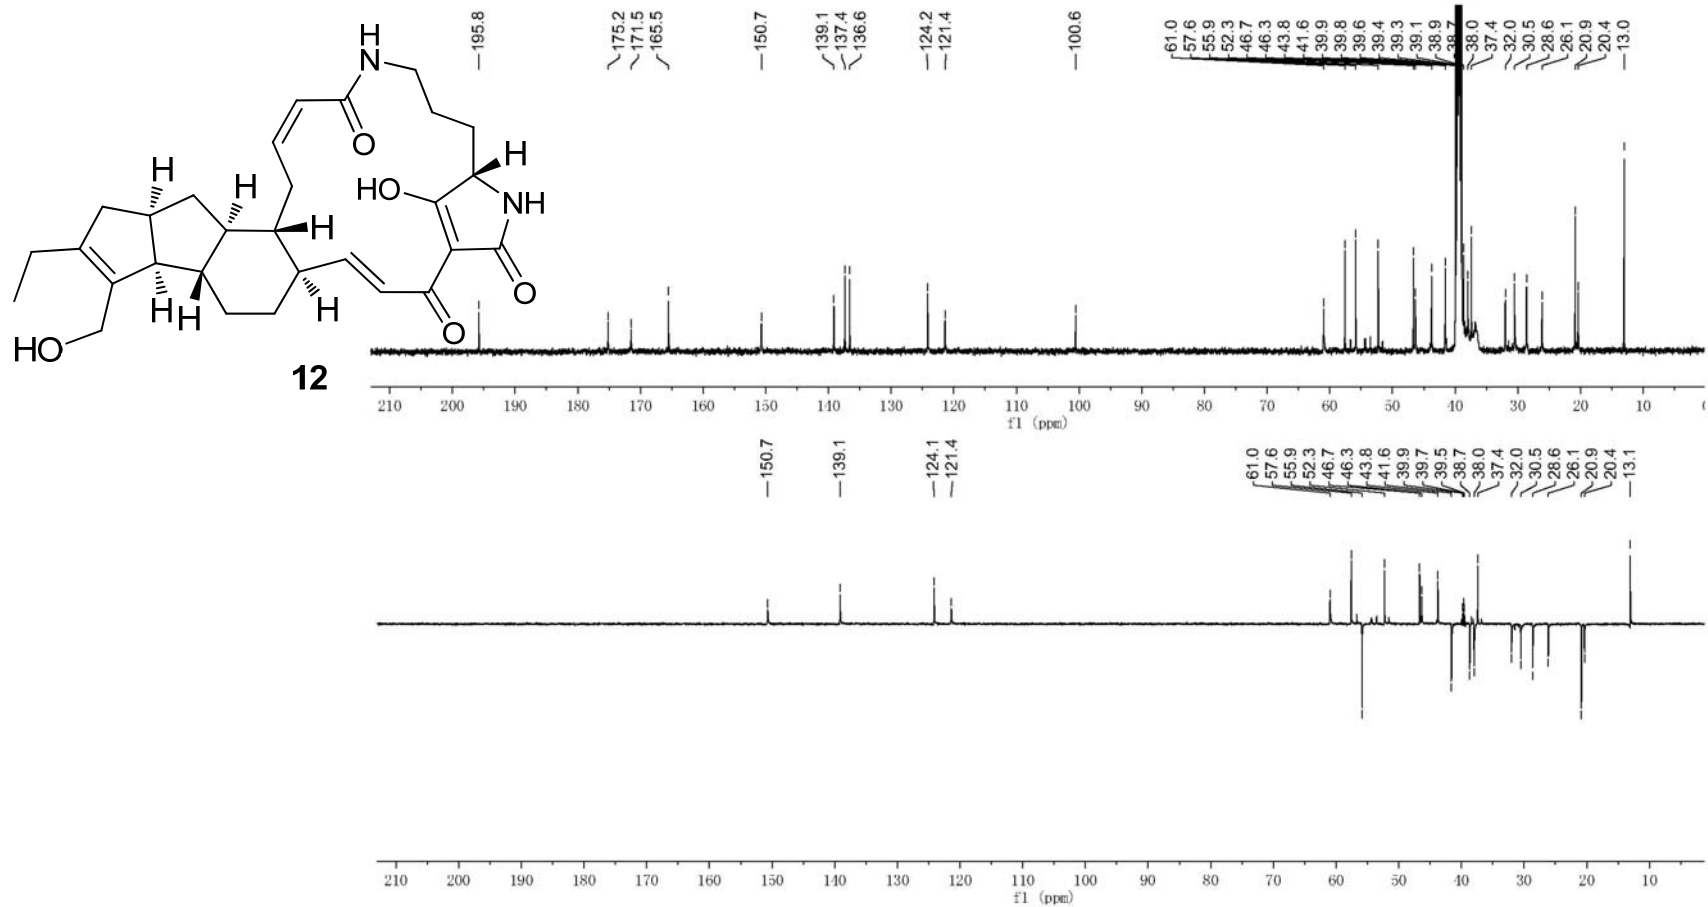

**Fig. S9.** Spectral data for pactamide B (**12**) (continued).  
**(D)** The HSQC spectrum of pactamide B (**12**) in DMSO-*d*<sub>6</sub>.

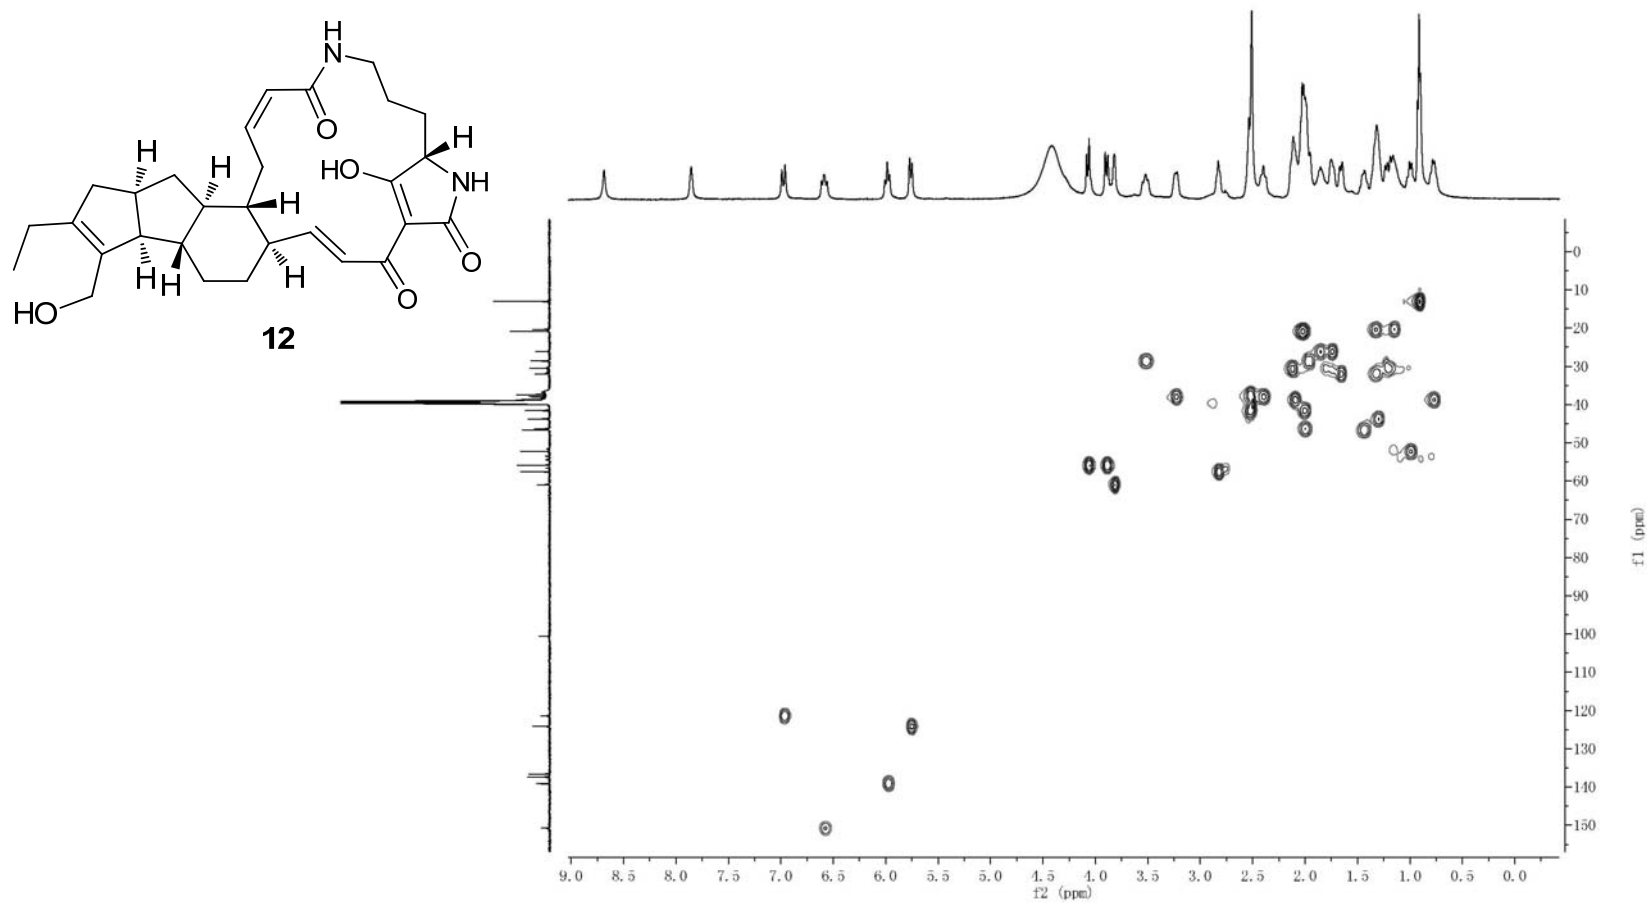

**Fig. S9.** Spectral data for pactamide B (**12**) (continued).  
**(E)** The HMBC spectrum of pactamide B (**12**) in DMSO-*d*<sub>6</sub>.

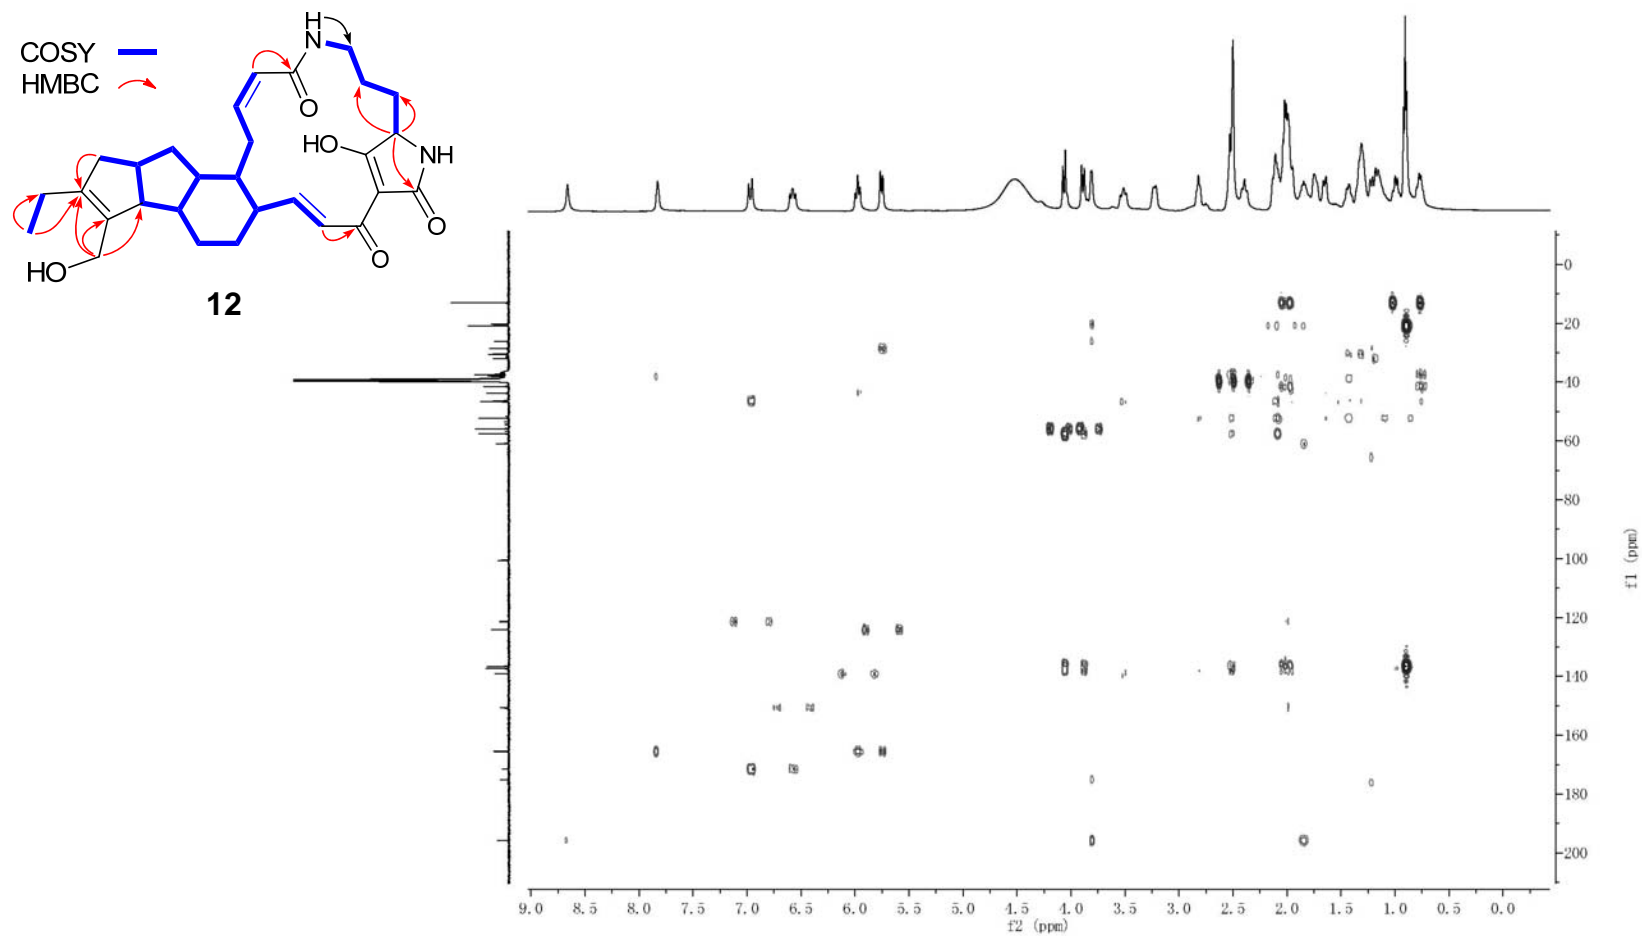

**Fig. S9.** Spectral data for pactamide B (**12**) (continued).  
**(F)** The COSY spectrum of pactamide B (**12**) in DMSO- $d_6$ .

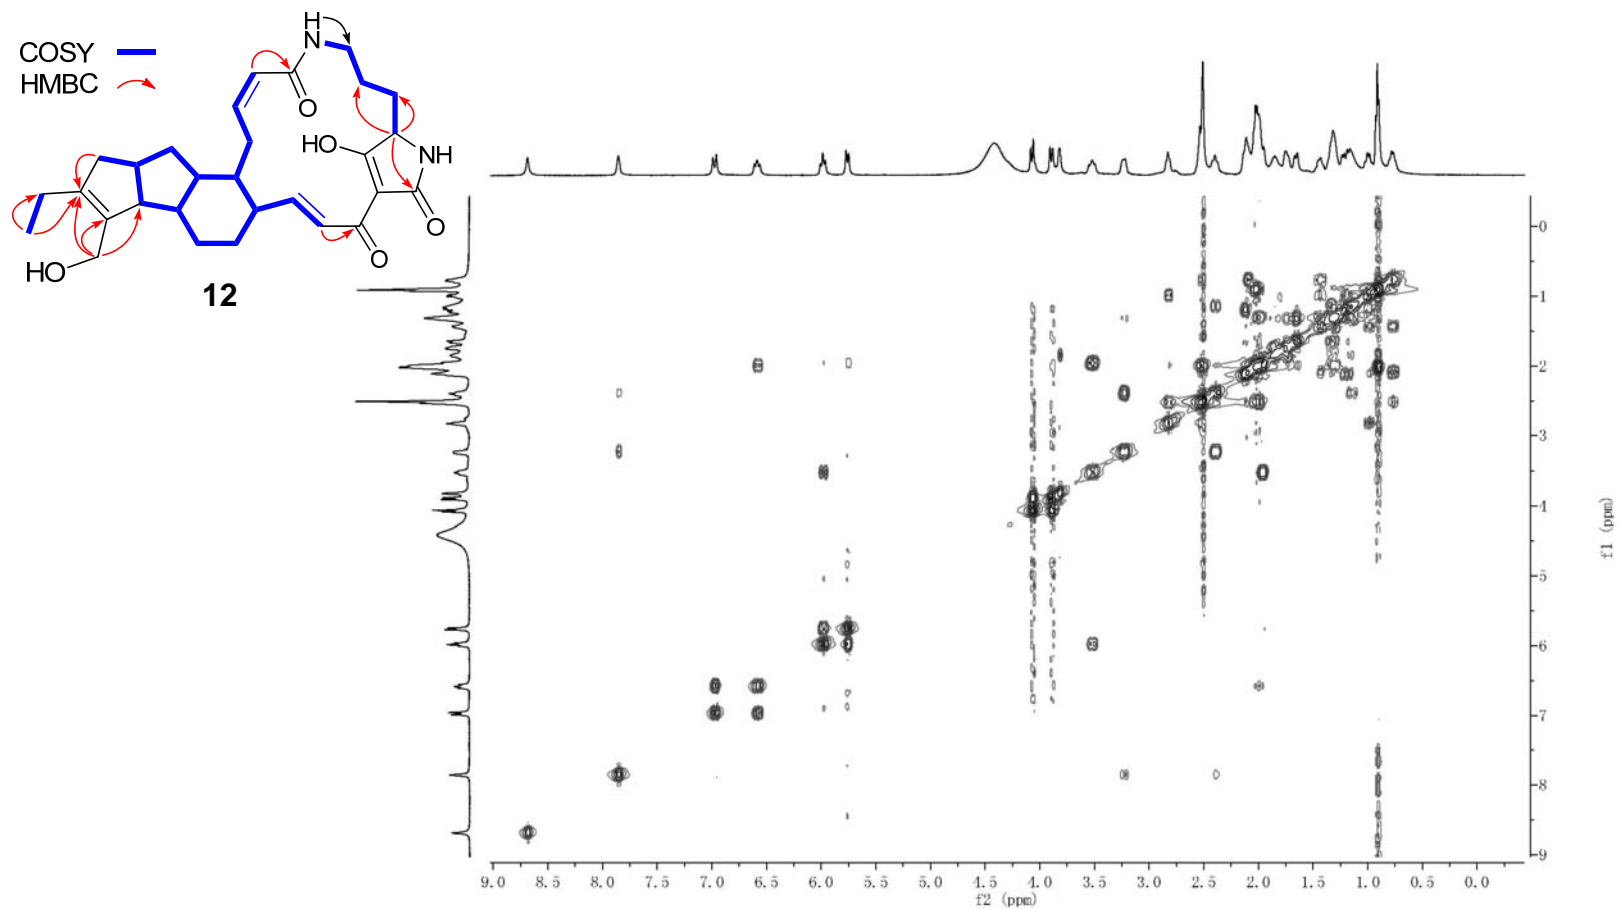

**Fig. S9.** Spectral data for pactamide B (**12**) (continued).  
**(G)** The NOESY spectrum of pactamide B (**12**) in DMSO- $d_6$ .

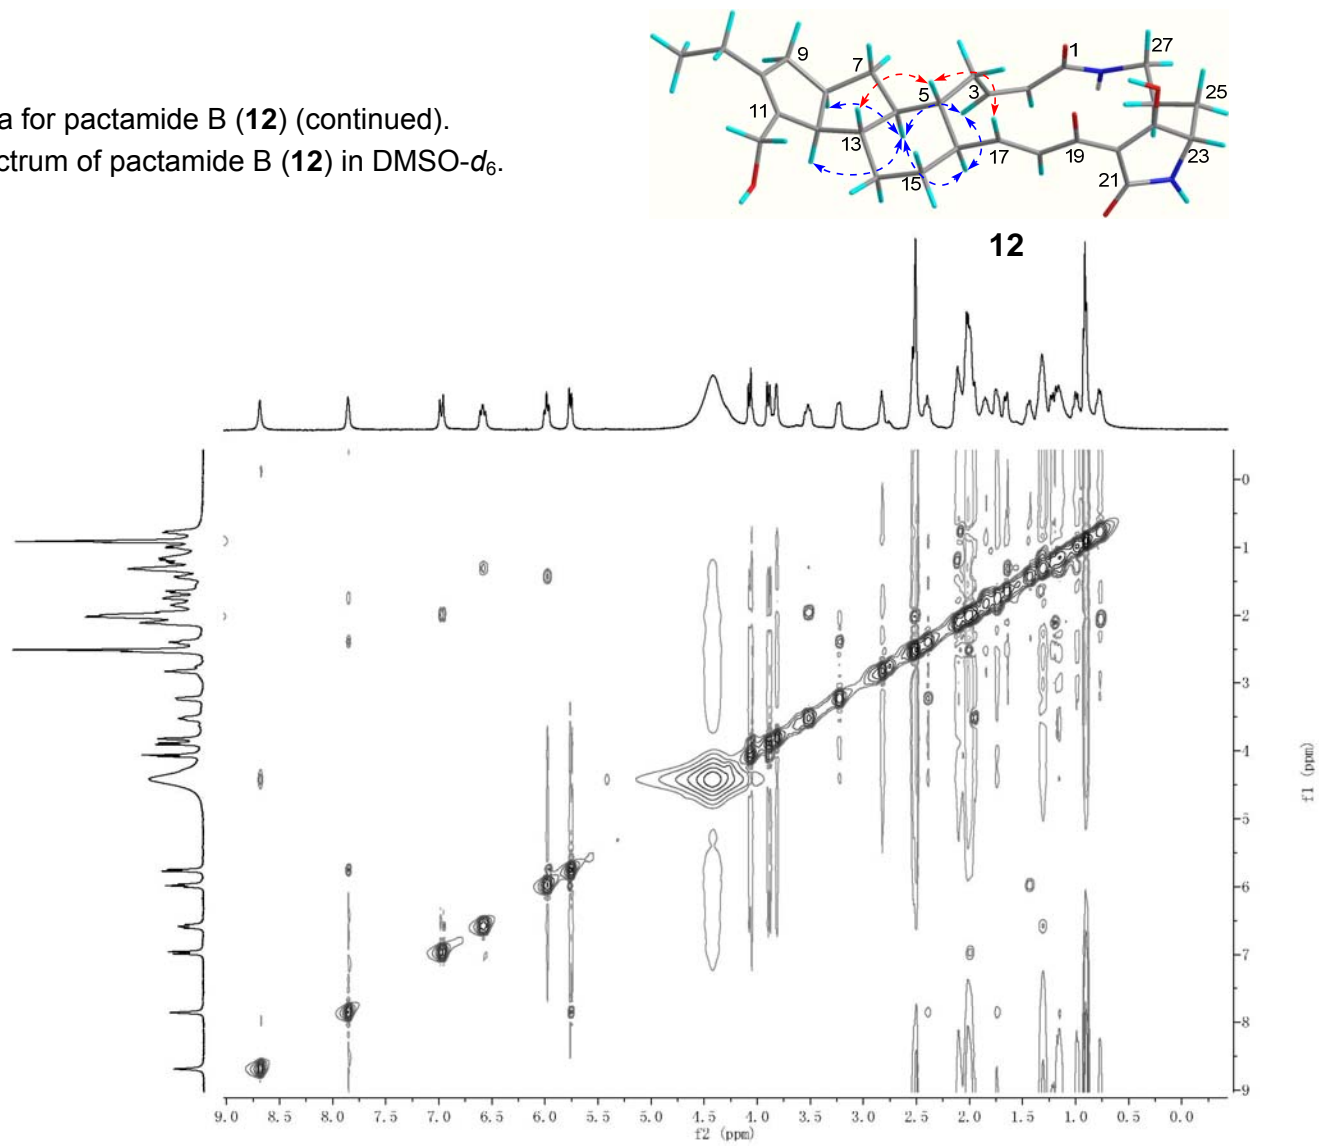



**Fig. S10.** Spectral data for pactamide C (**13**).

**(A) HRESIMS (13)**

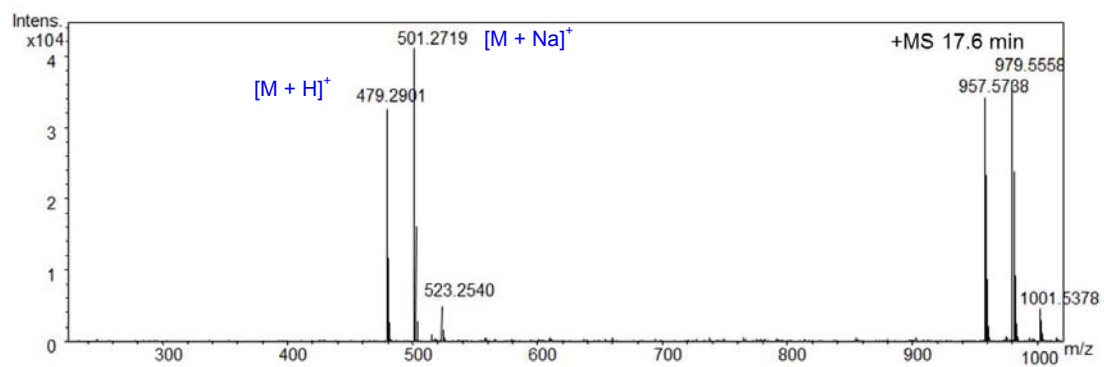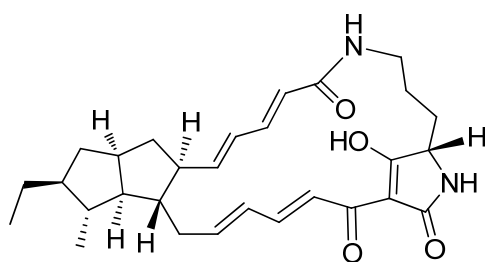

**13**

Chemical Formula:  $C_{29}H_{38}N_2O_4$   
calculated for  $[M + H]^+$ : 479.2910  
calculated for  $[M + Na]^+$ : 501.2729

**Fig. S10.** Spectral data for pactamide C (**13**) (continued).  
**(B)** The  $^1\text{H}$  NMR spectrum of pactamide C (**13**) in  $\text{DMSO-}d_6$ .

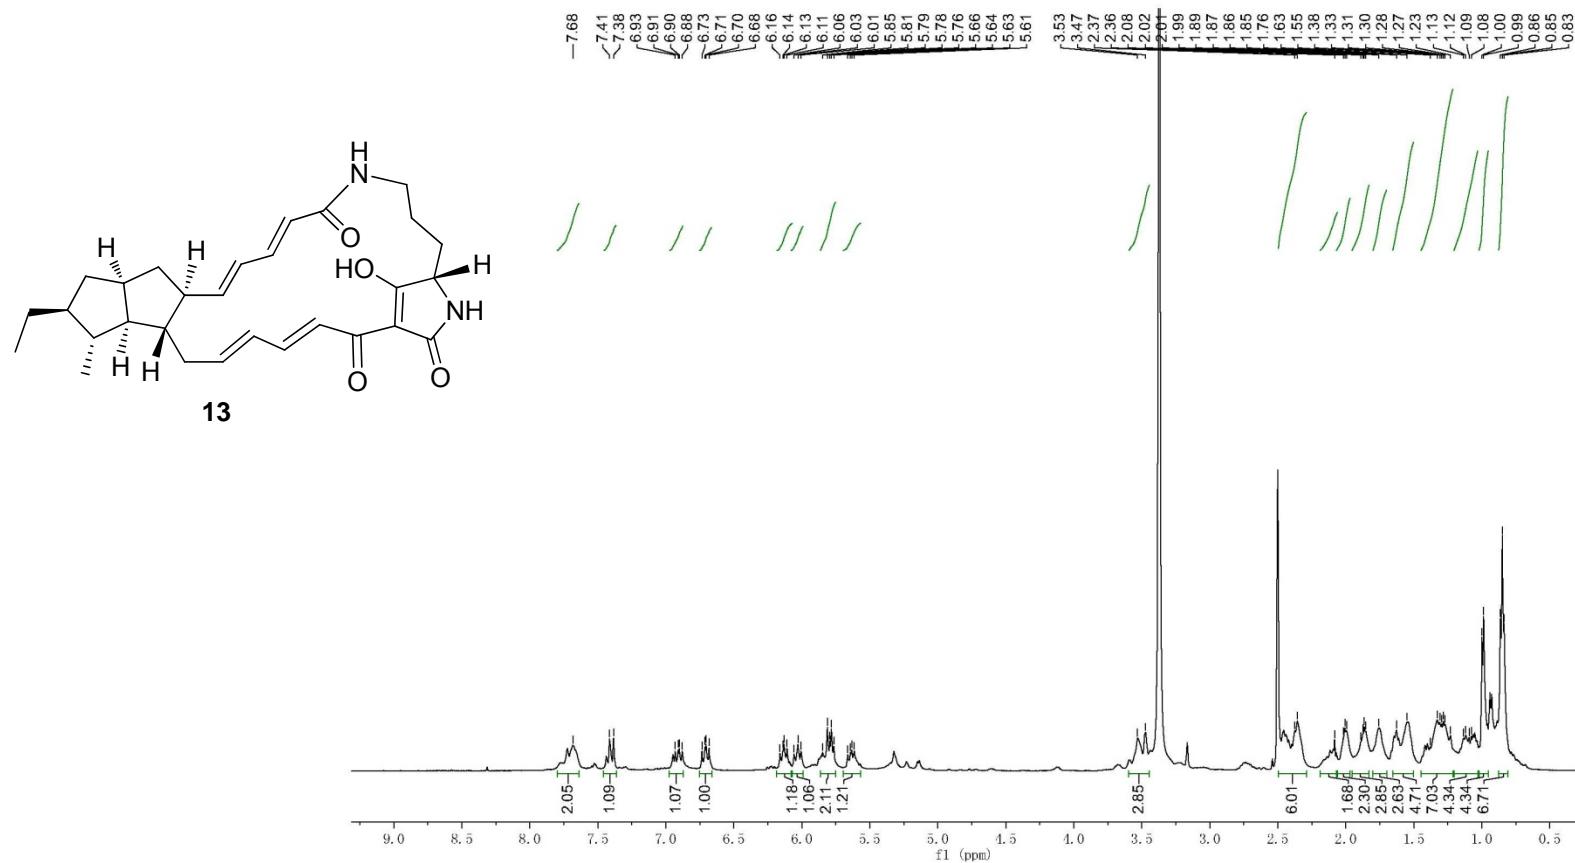

**Fig. S10.** Spectral data for pactamide C (**13**) (continued).  
**(C)** The  $^{13}\text{C}$  NMR spectrum of pactamide C (**13**) in  $\text{DMSO}-d_6$ .

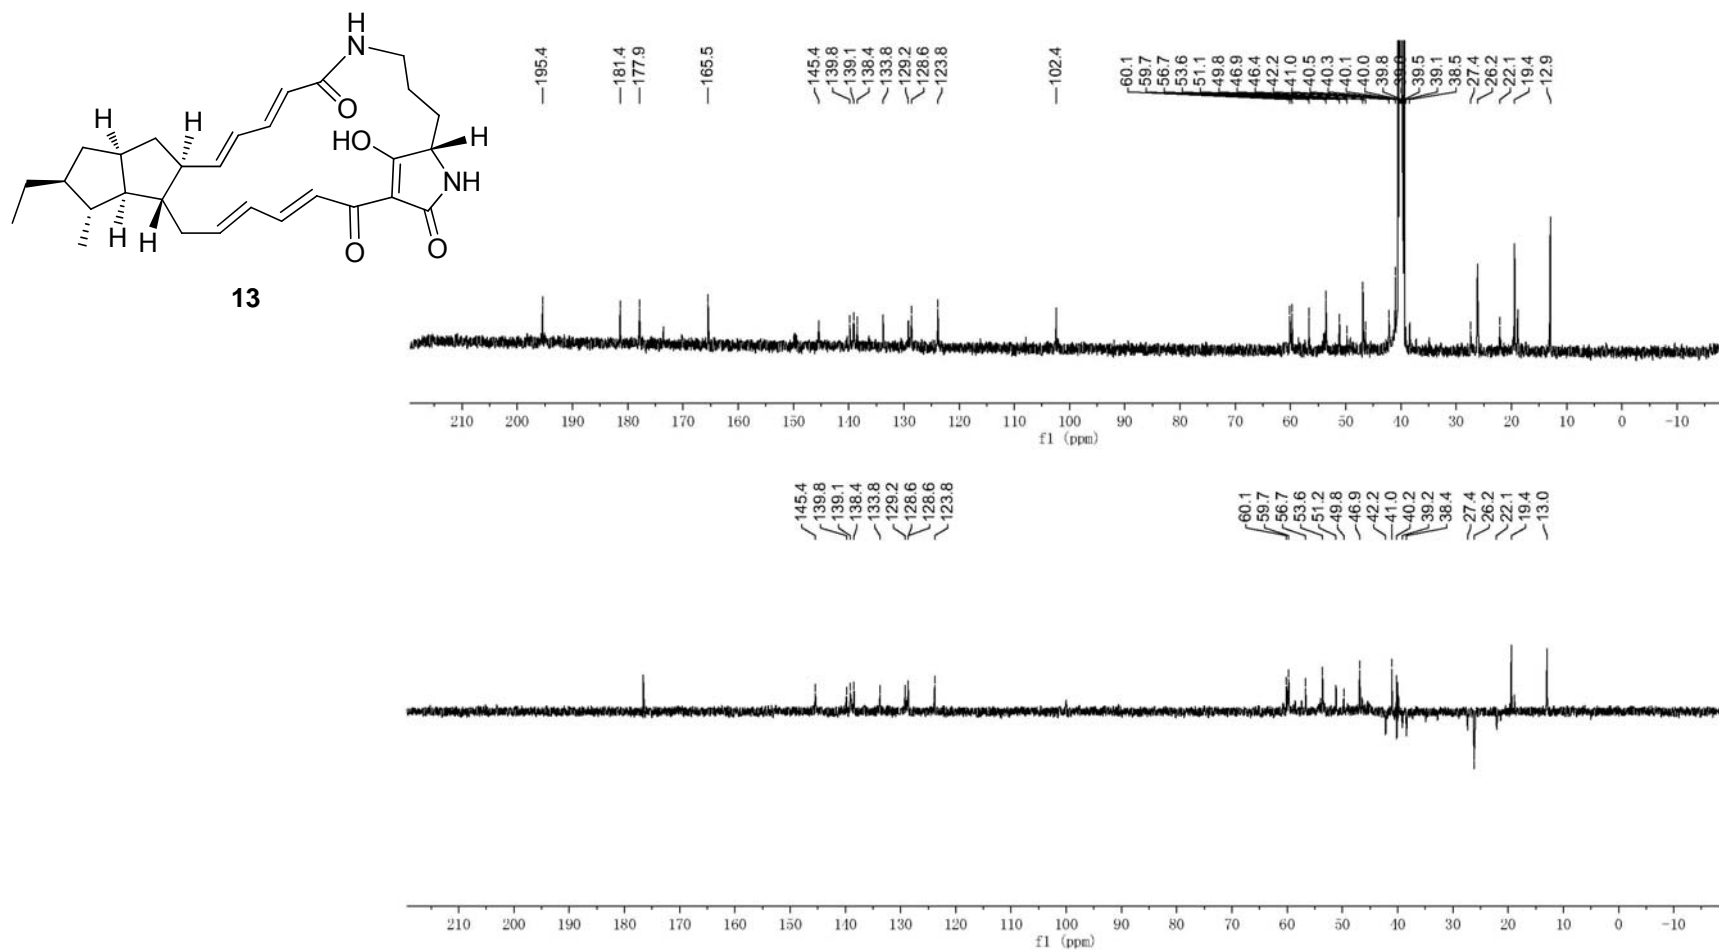

**Fig. S10.** Spectral data pactamide C (**13**) (continued).  
**(D)** The HSQC spectrum of pactamide C (**13**) in DMSO- $d_6$ .

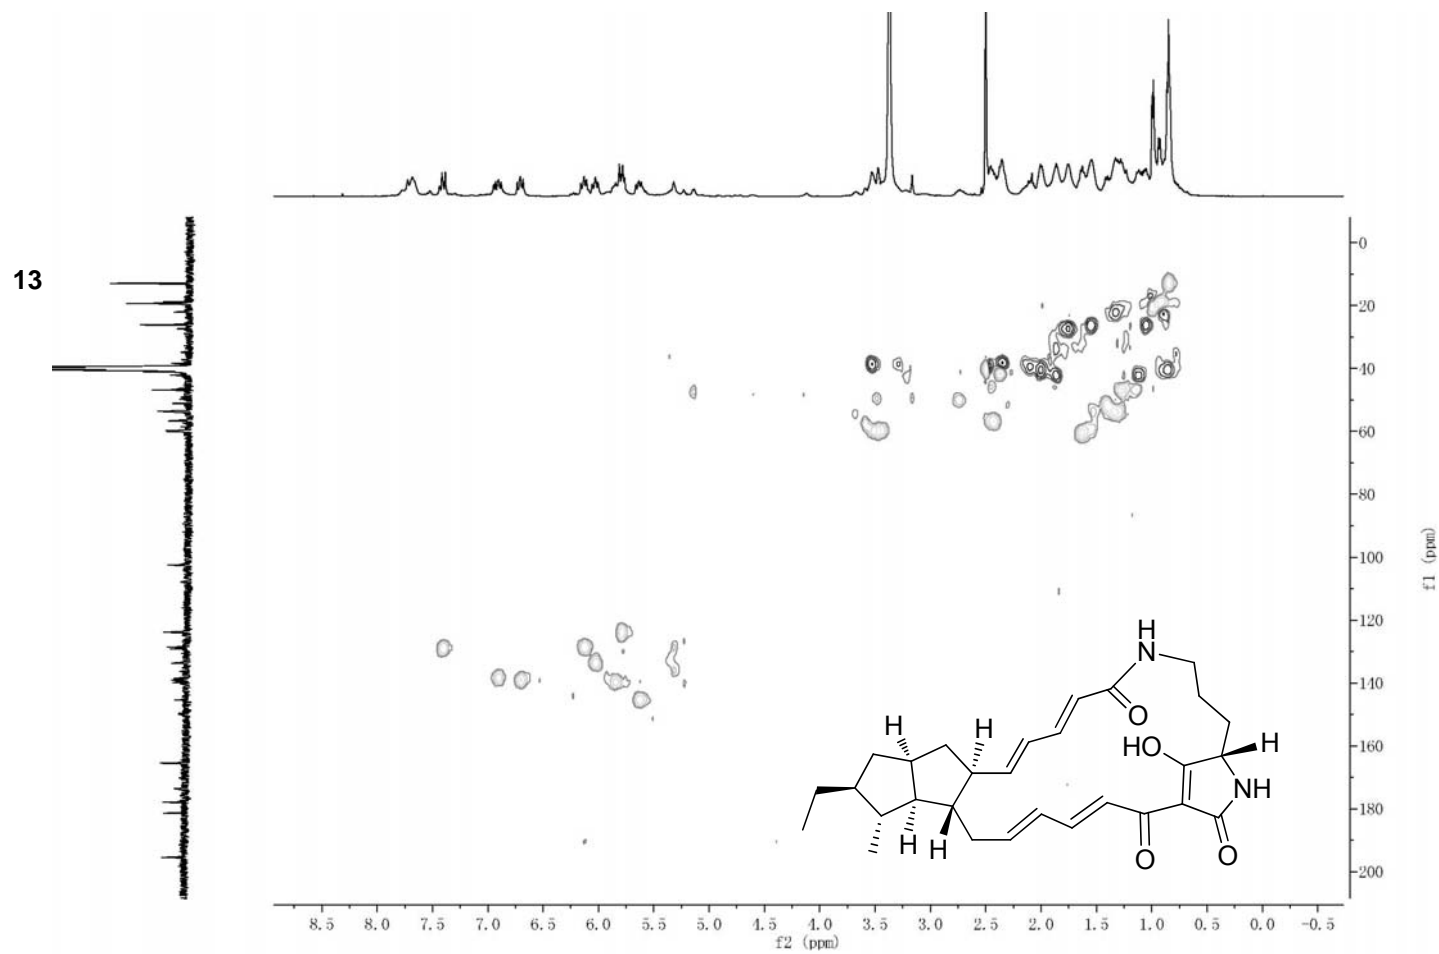

**Fig. S10.** Spectral data for pactamide C (**13**) (continued).  
**(E)** The HMBC spectrum of pactamide C (**13**) in DMSO- $d_6$ .

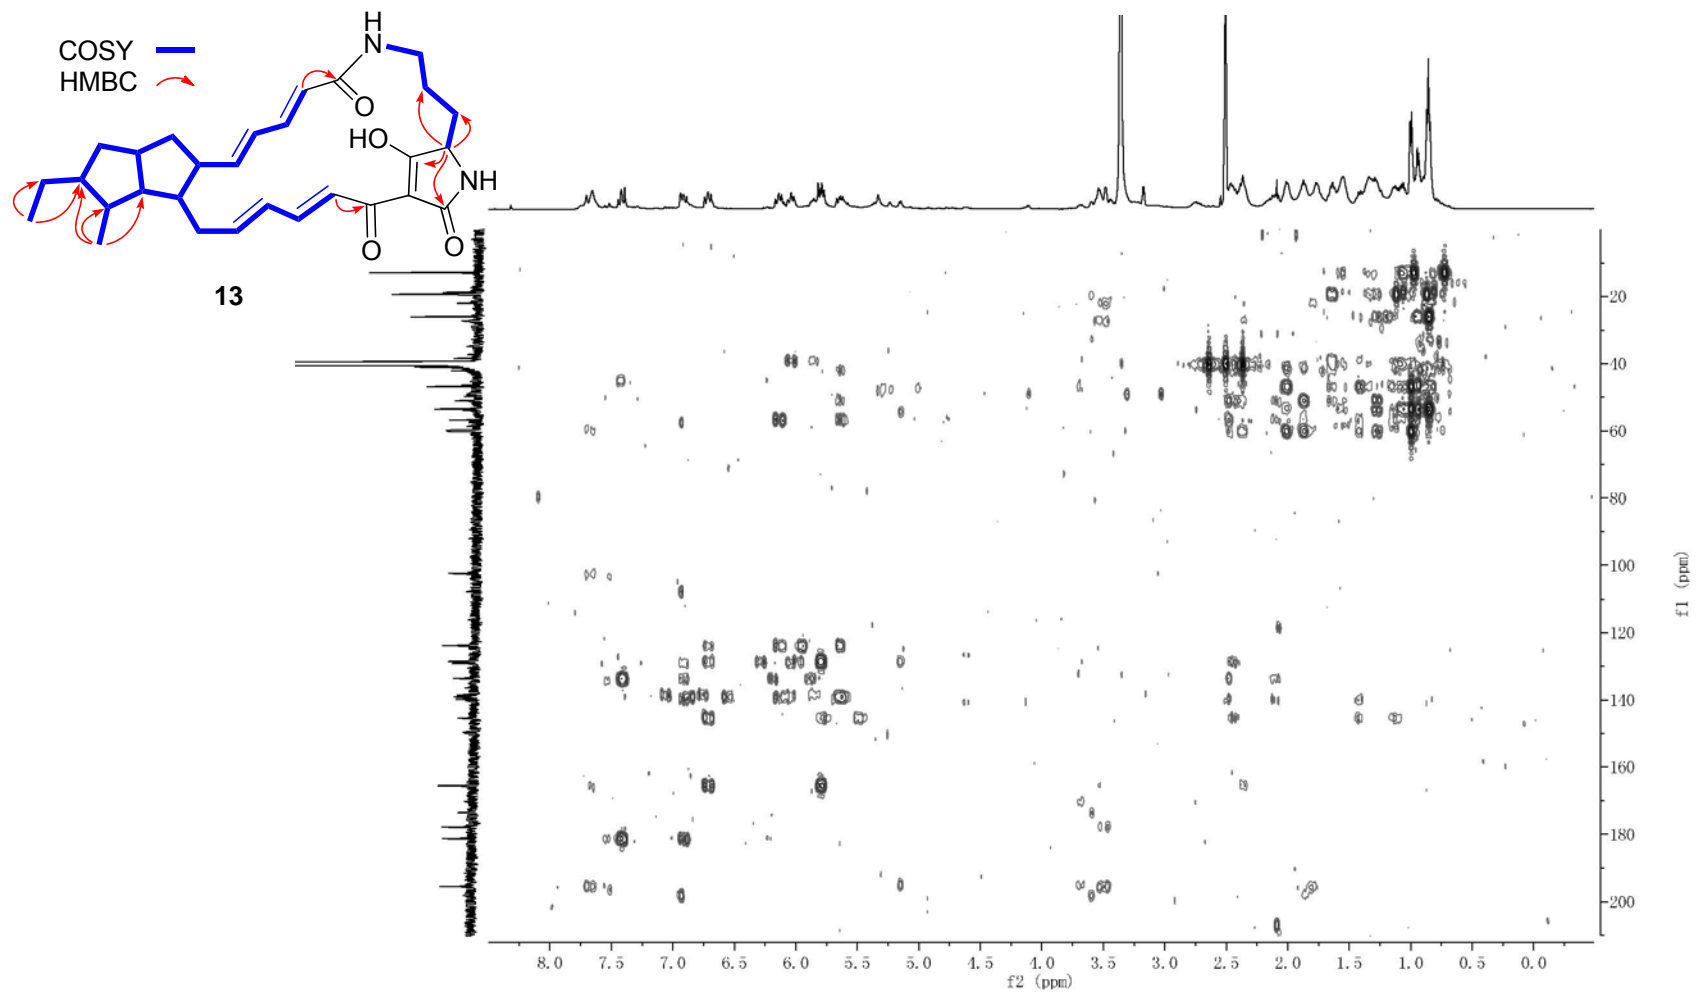

**Fig. S10.** Spectral data for pactamide C (**13**) (continued).  
**(F)** The COSY spectrum of pactamide C (**13**) in DMSO- $d_6$ .

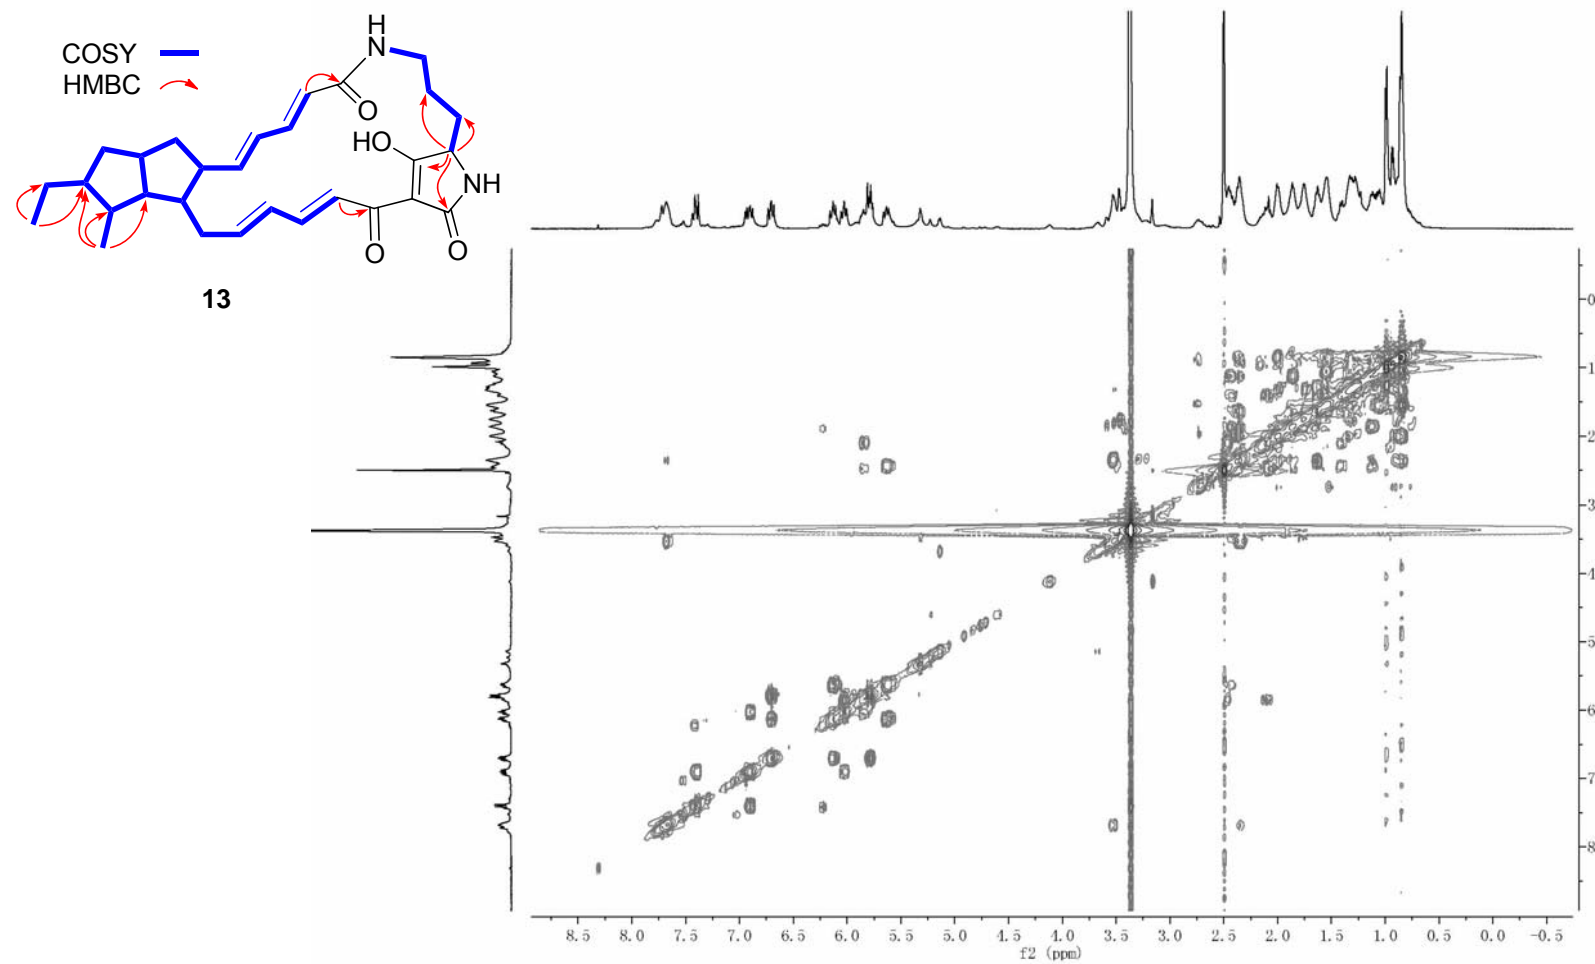

**Fig. S10.** Spectral data for pactamide C (**13**) (continued).  
**(G)** The NOESY spectrum of pactamide C (**13**) in DMSO-*d*<sub>6</sub>.

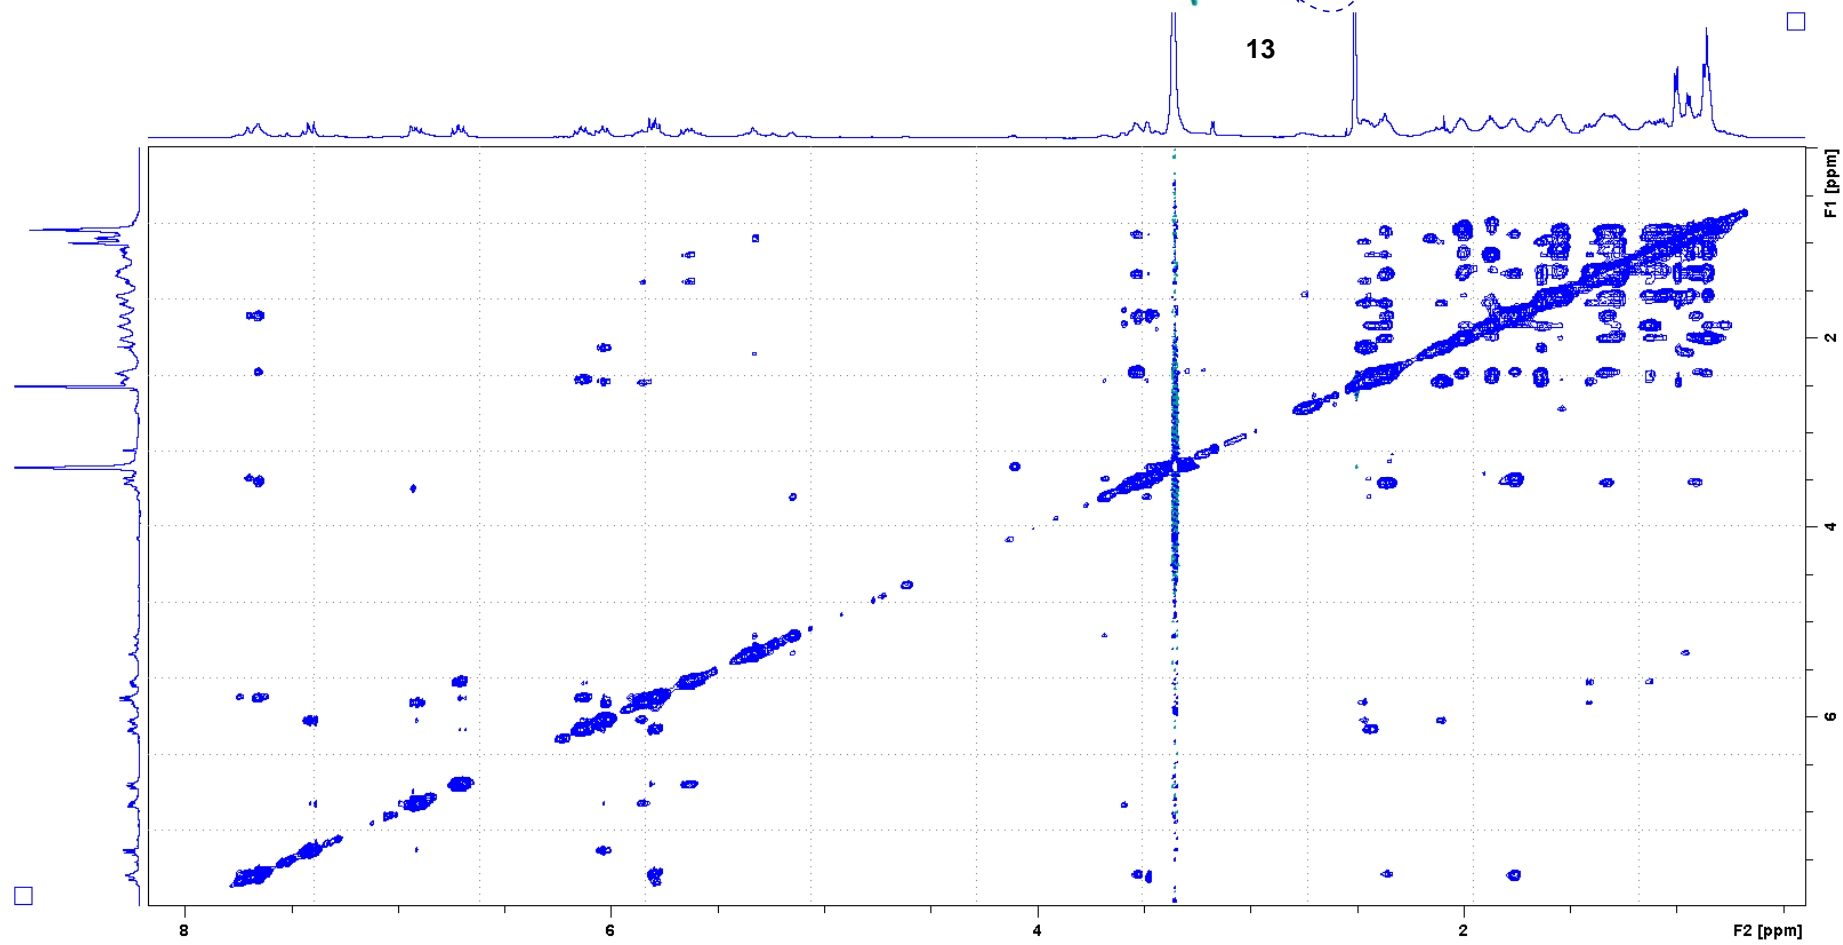

**Fig. S10.** Spectral data for pactamide C (**13**) (continued).  
**(H)** The NOESY spectrum of pactamide C (**13**) in DMSO-*d*<sub>6</sub>.

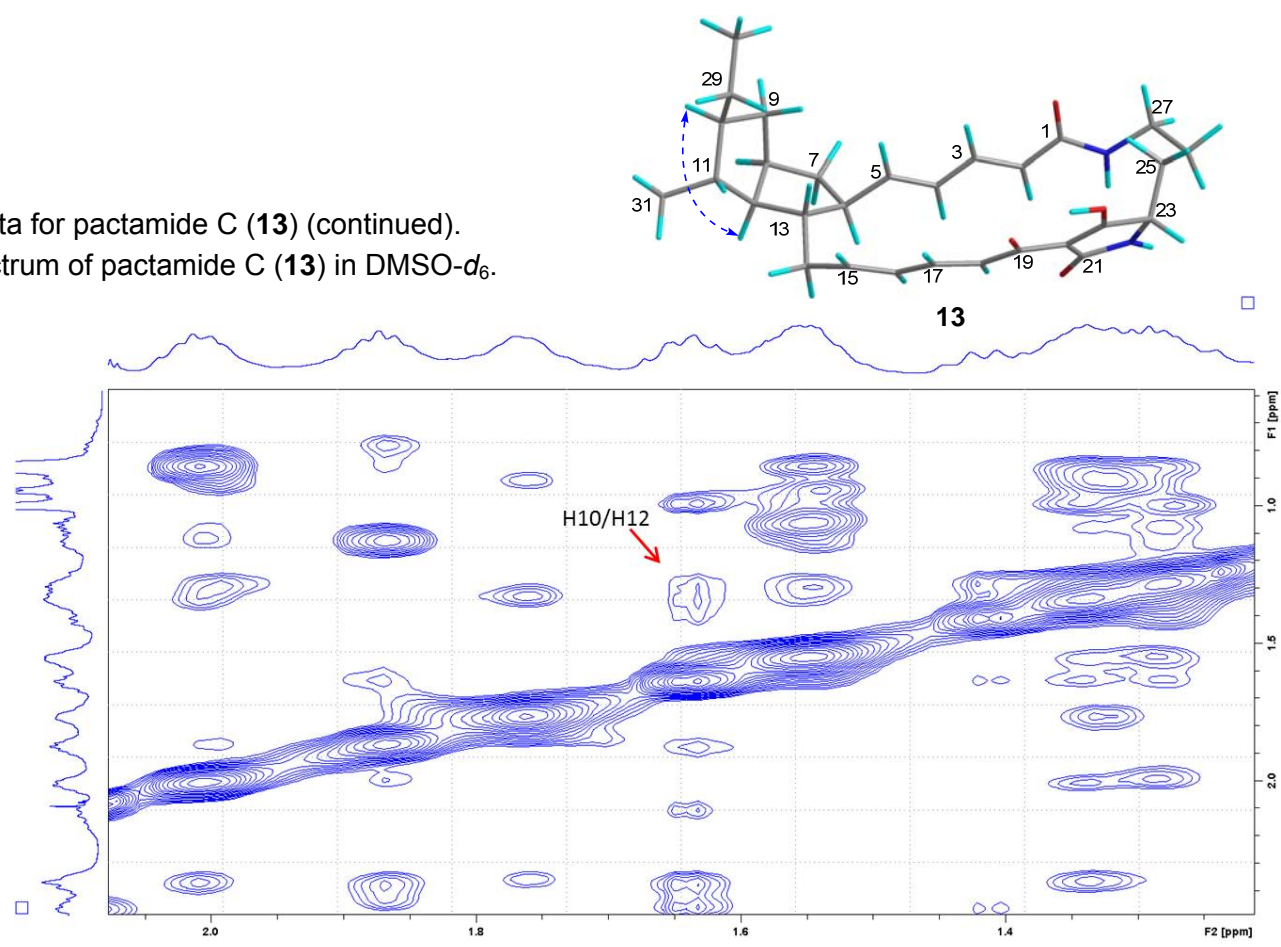



**Fig. S11.** Spectral data for pactamide D (**14**).

**(A)** HRESIMS.

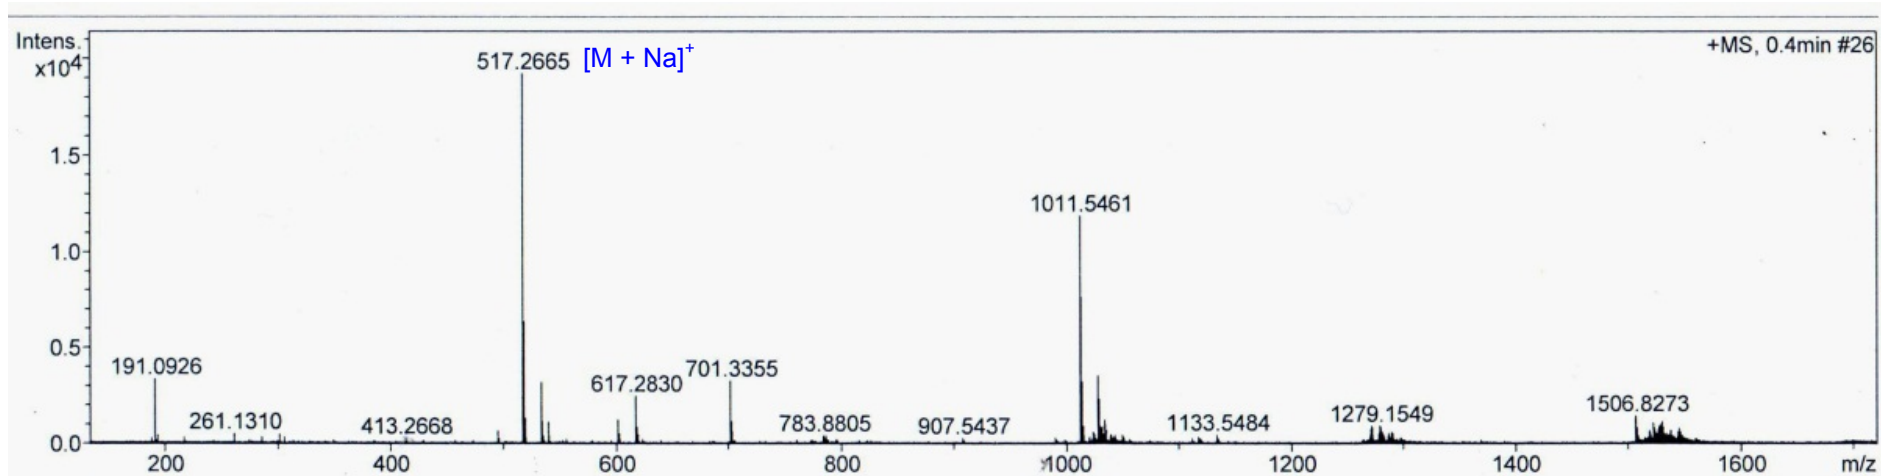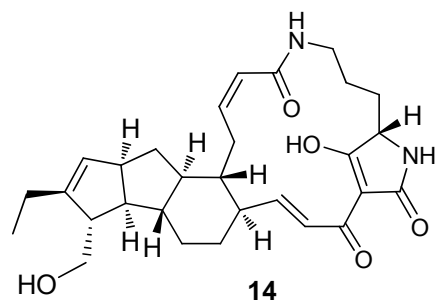

Chemical Formula: C<sub>29</sub>H<sub>38</sub>N<sub>2</sub>O<sub>5</sub>  
calculated for [M + Na]<sup>+</sup>: 517.2678

**Fig. S11.** Spectral data for pactamide D (**14**) (continued).  
**(B)** The  $^1\text{H}$  NMR spectrum of pactamide D (**14**) in  $\text{DMSO-}d_6$ .

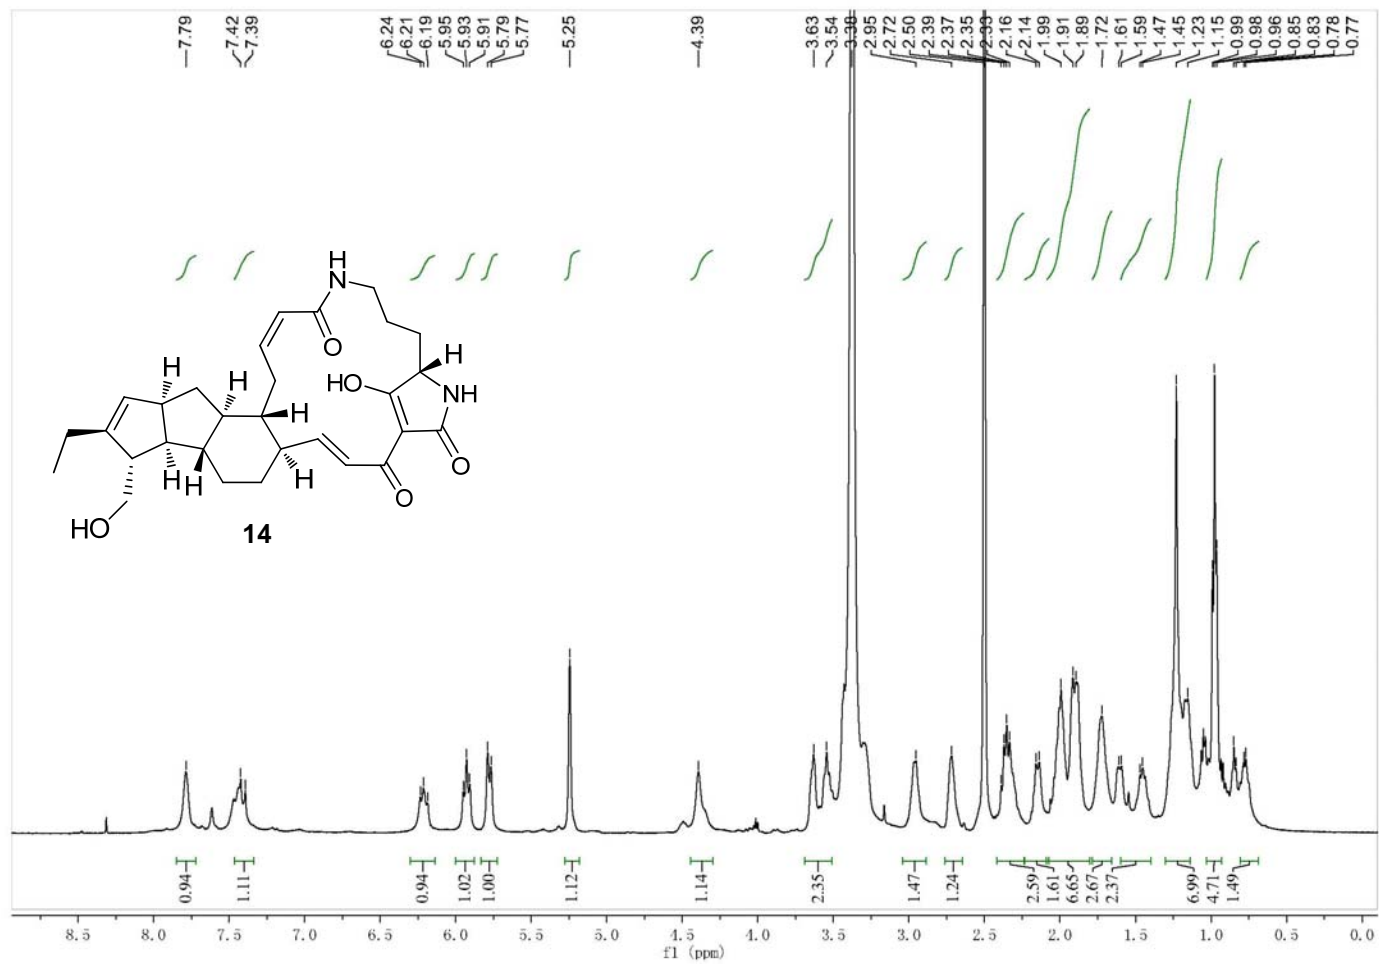

**Fig. S11.** Spectral data for pactamide D (**14**) (continued).  
**(C)** The  $^{13}\text{C}$  NMR spectrum of pactamide D (**14**) in  $\text{DMSO}-d_6$ .

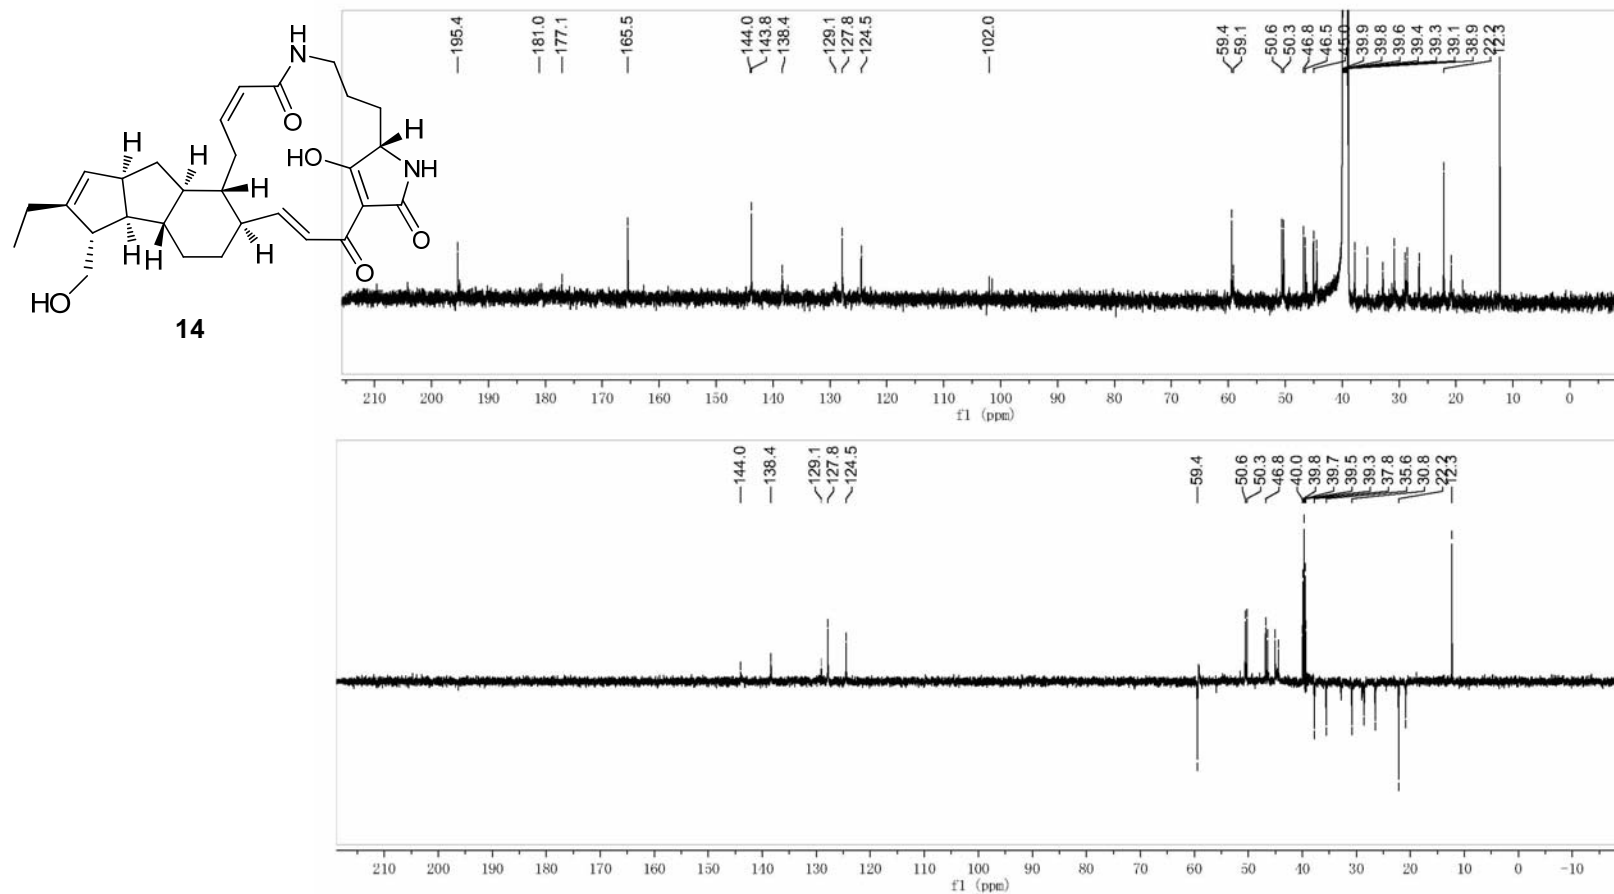

**Fig. S11.** Spectral data for pactamide D (**14**) (continued).  
**(D)** The HSQC spectrum of pactamide D (**14**) in DMSO- $d_6$ .

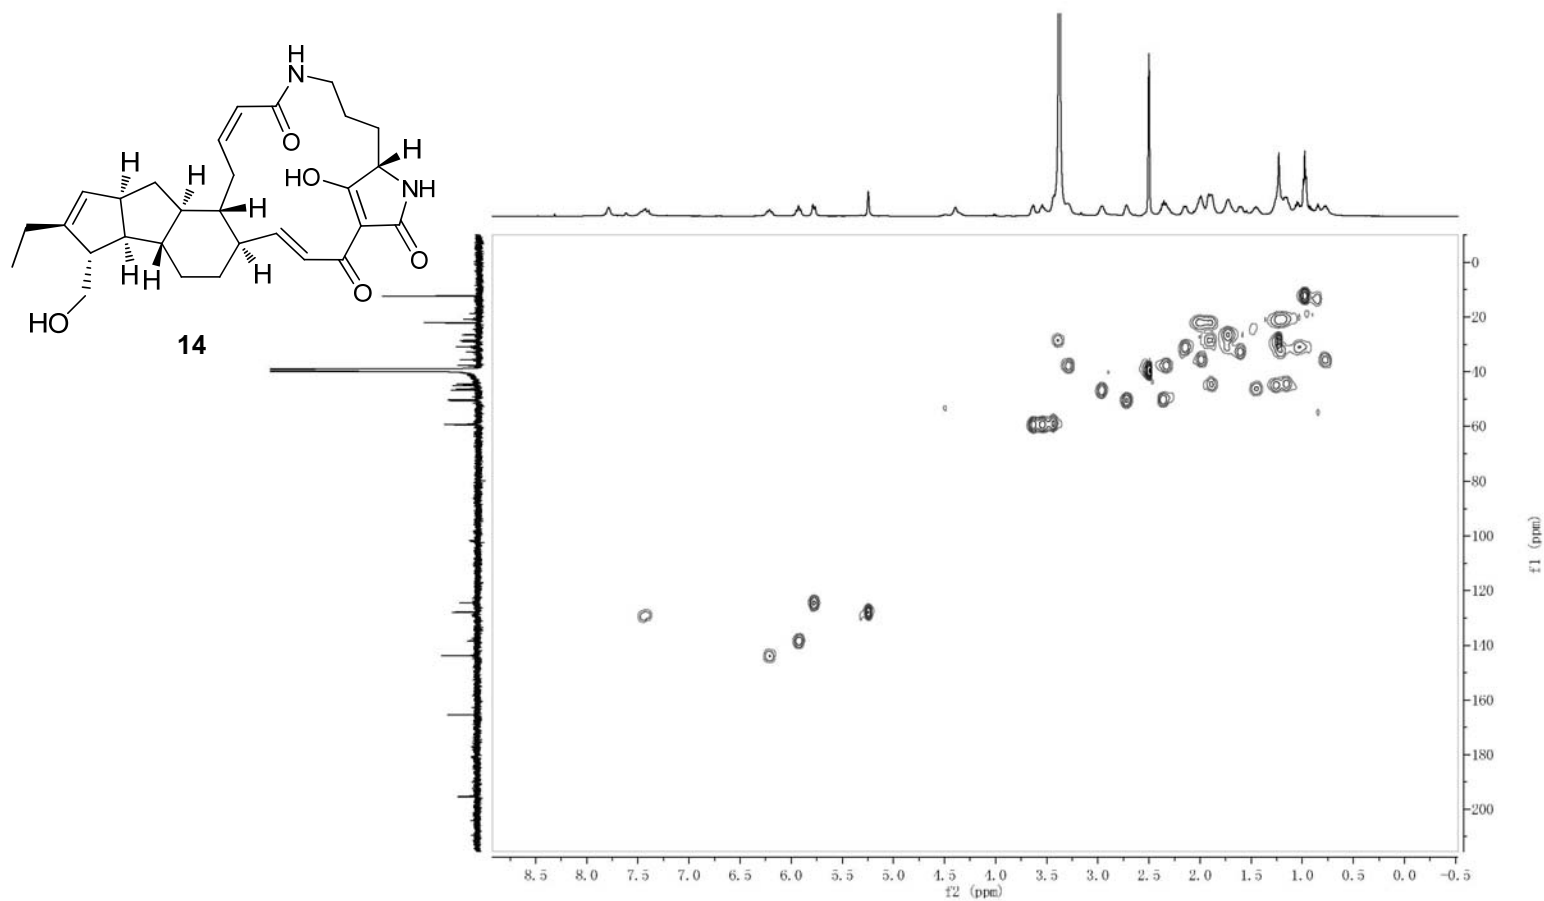

**Fig. S11.** Spectral data for pactamide D (**14**) (continued).  
**(E)** The COSY spectrum of pactamide D (**14**) in DMSO- $d_6$ .

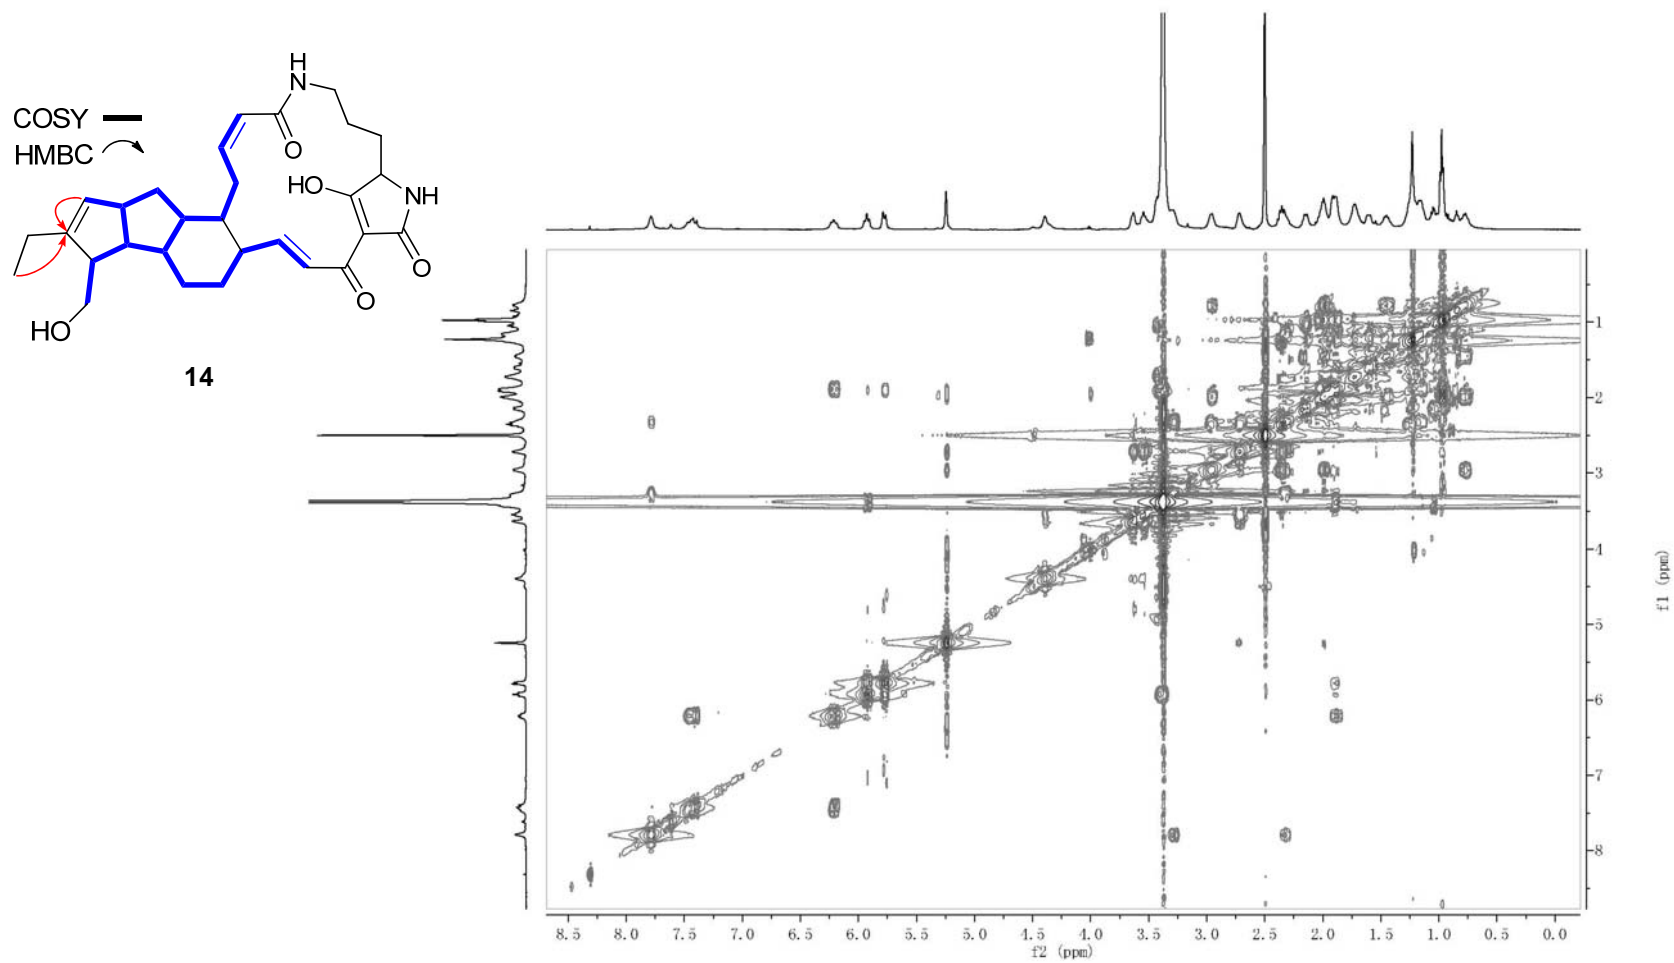

**Fig. S11.** Spectral data for pactamide D (**14**) (continued).  
**(F)** The HMBC spectrum of pactamide D (**14**) in DMSO- $d_6$ .

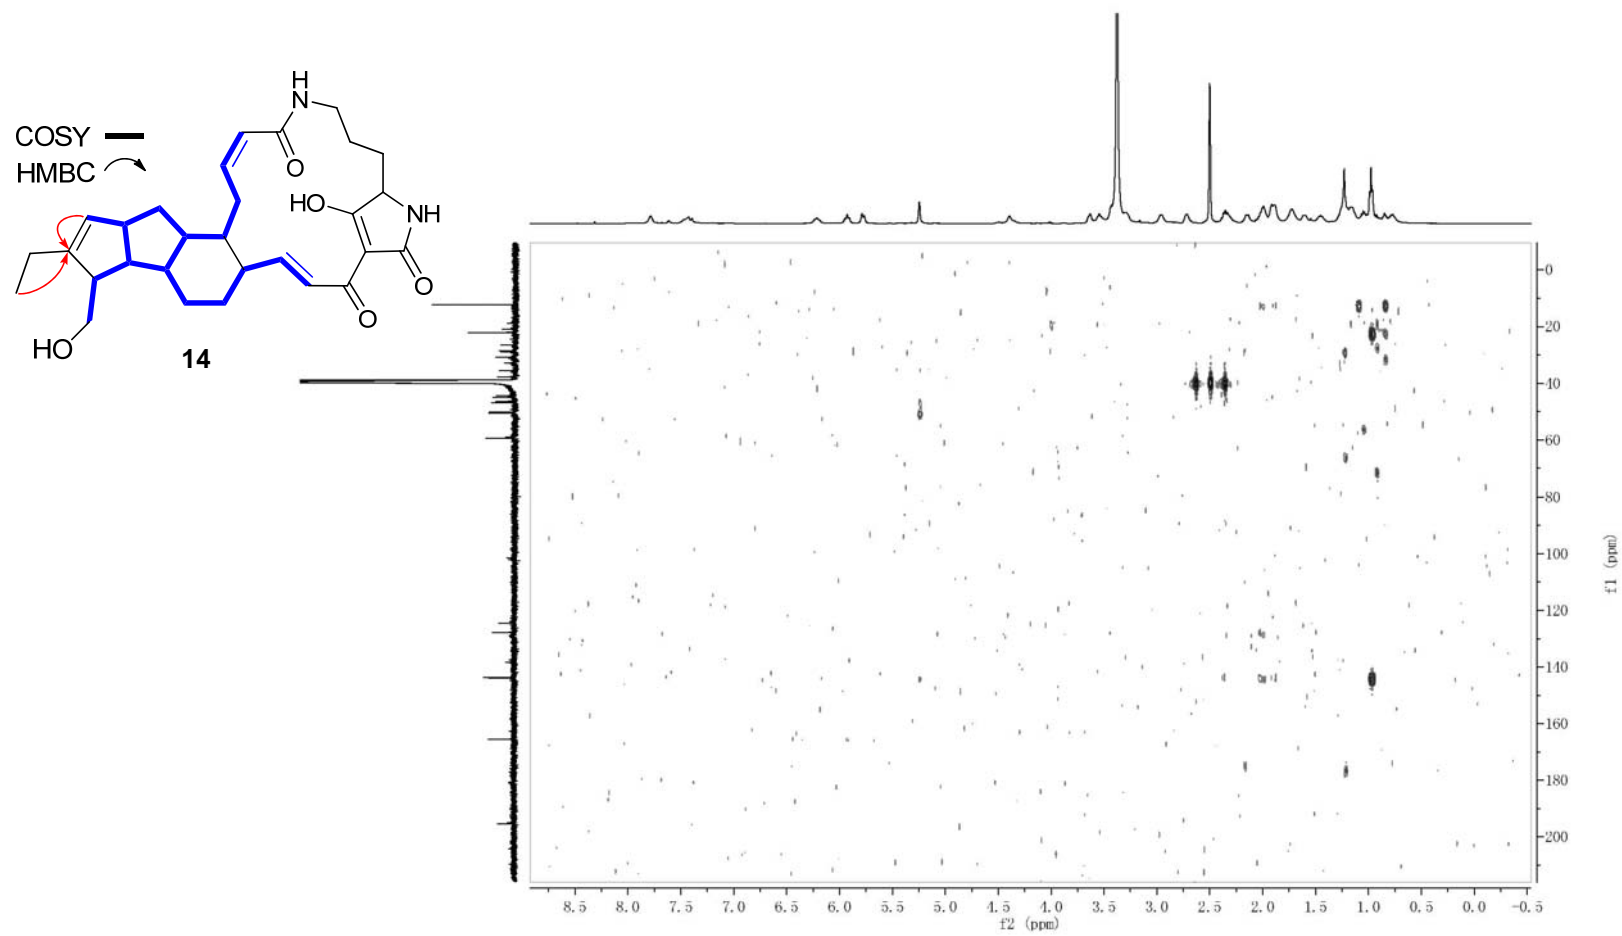

**Fig. S11.** Spectral data for pactamide D (**14**) (continued).  
**(G)** The NOESY spectrum of pactamide D (**14**) in DMSO-*d*<sub>6</sub>.

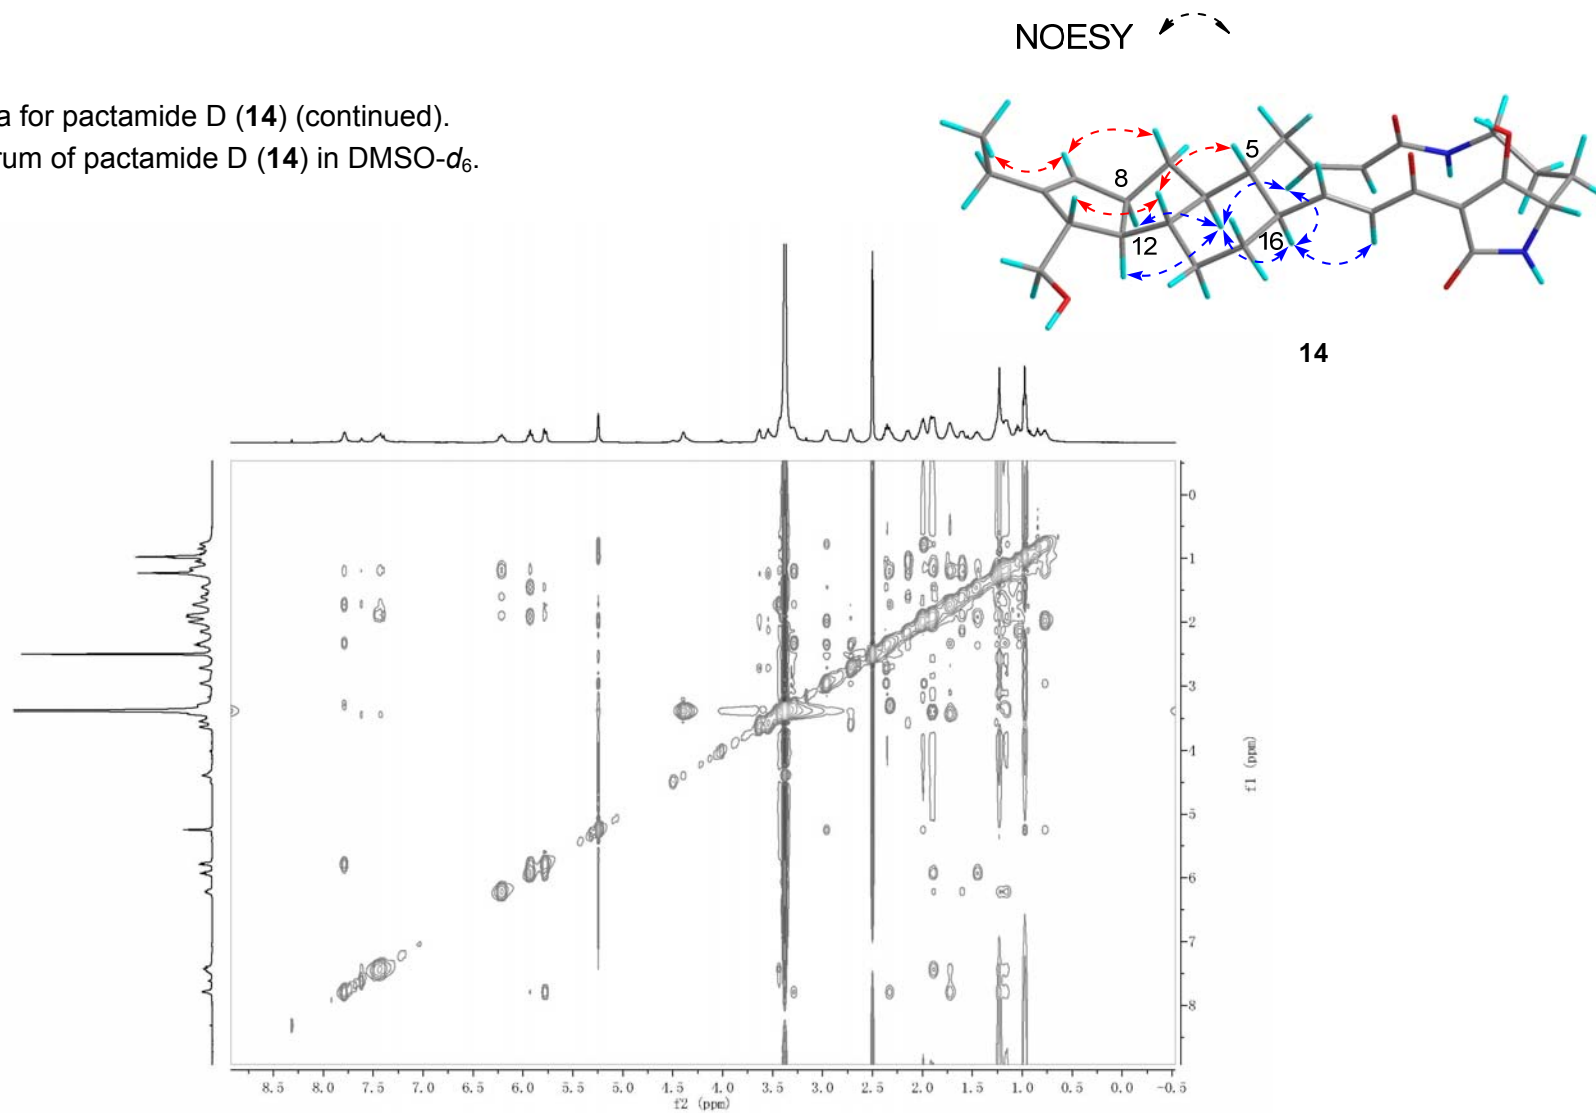

**Fig. S12.** Spectral data for pactamide E (**15**).

**(A)** HR-ESI-MS.

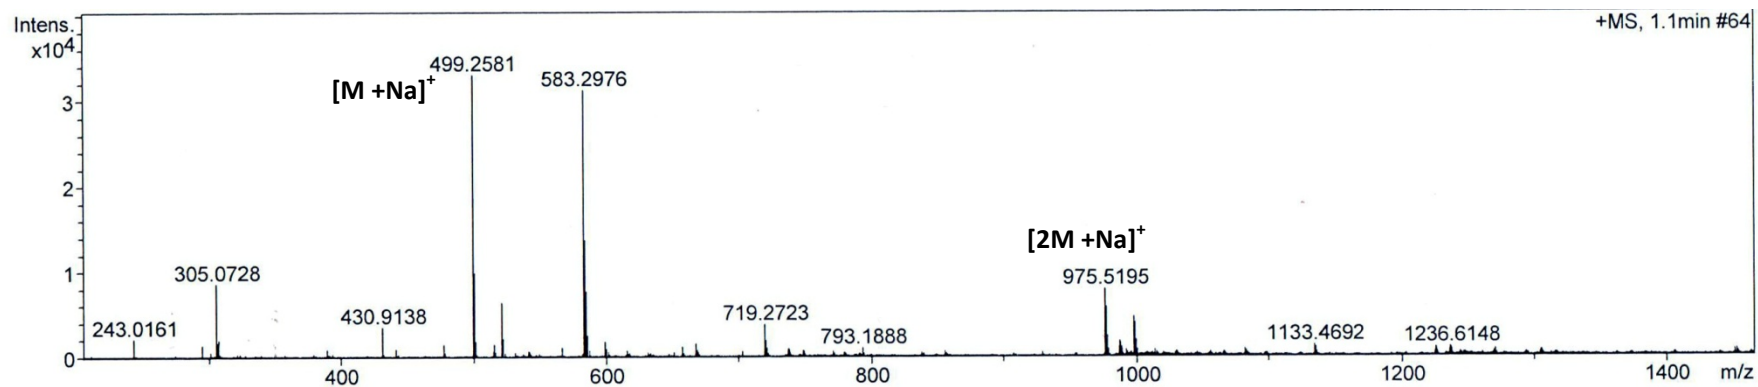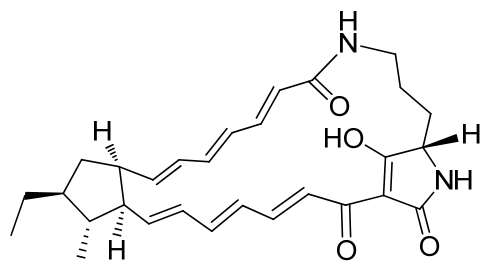

Chemical Formula:  $C_{29}H_{36}N_2O_4$

calculated for [M + Na]<sup>+</sup> 499.2567

**15**



**Fig. S12.** Spectral data for pactamide E (**15**) (continued).  
**(B)** The  $^1\text{H}$  NMR spectrum of pactamide E (**15**) in  $\text{DMSO-}d_6$ .

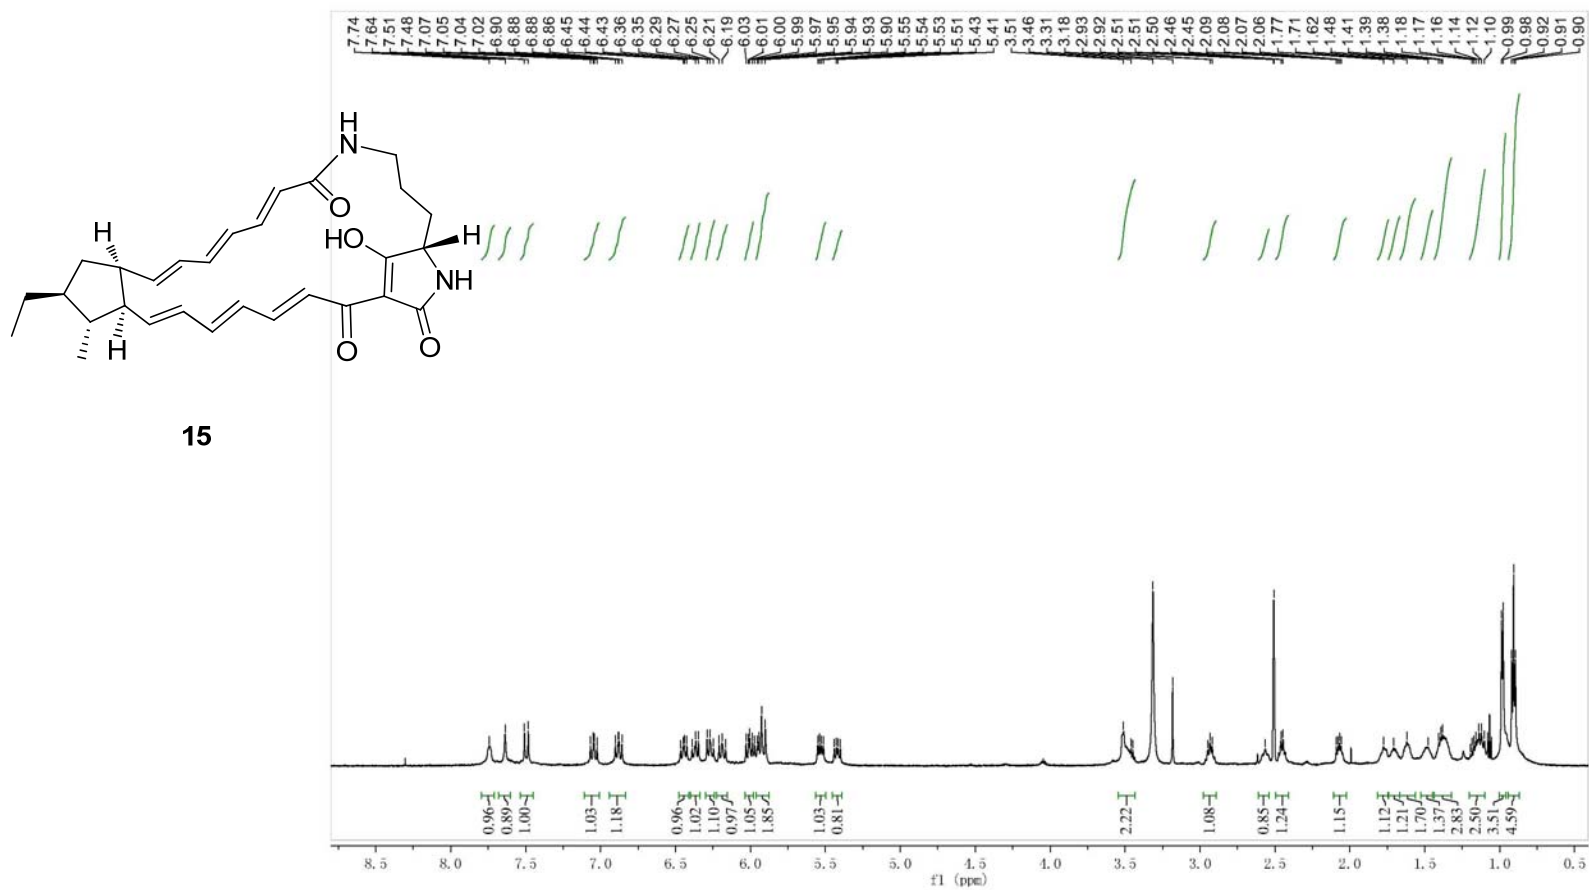

**Fig. S12.** Spectral data for pactamide E (**15**) (continued).

(C) The  $^{13}\text{C}$  and DEPT 135 NMR spectrum of pactamide E (**15**) in  $\text{DMSO-}d_6$ .

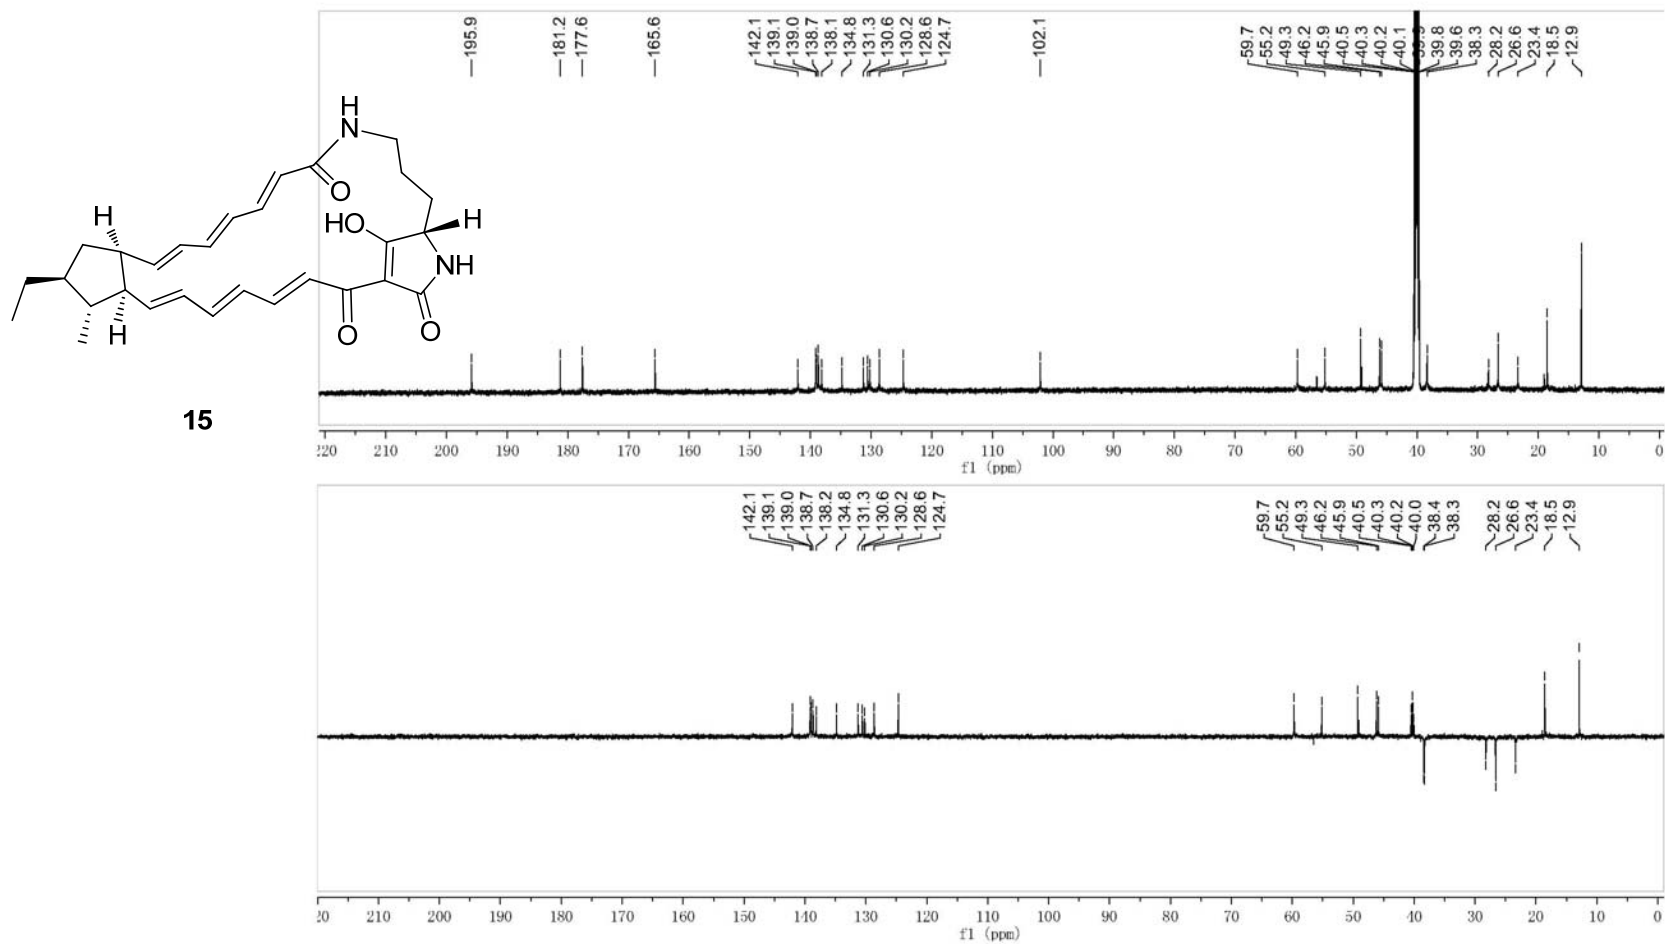

**Fig. S12.** Spectral data for pactamide E (**15**) (continued).  
**(D)** The COSY spectrum of pactamide E (**15**) in DMSO- $d_6$ .

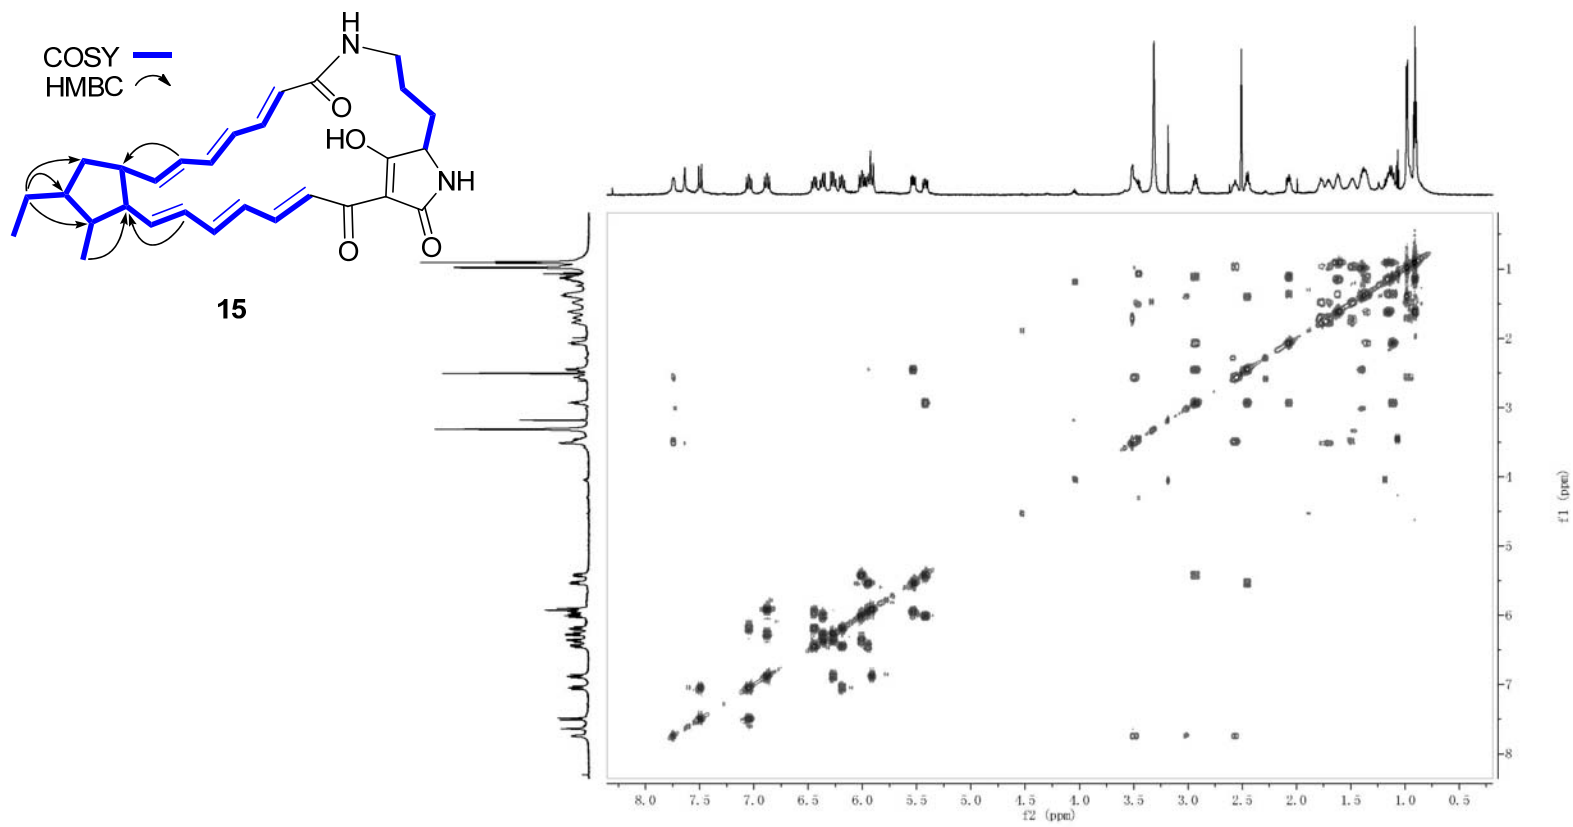

**Fig. S12.** Spectral data for pactamide E (**15**) (continued).  
**(E)** The HSQC spectrum of pactamide E (**15**) in DMSO- $d_6$ .

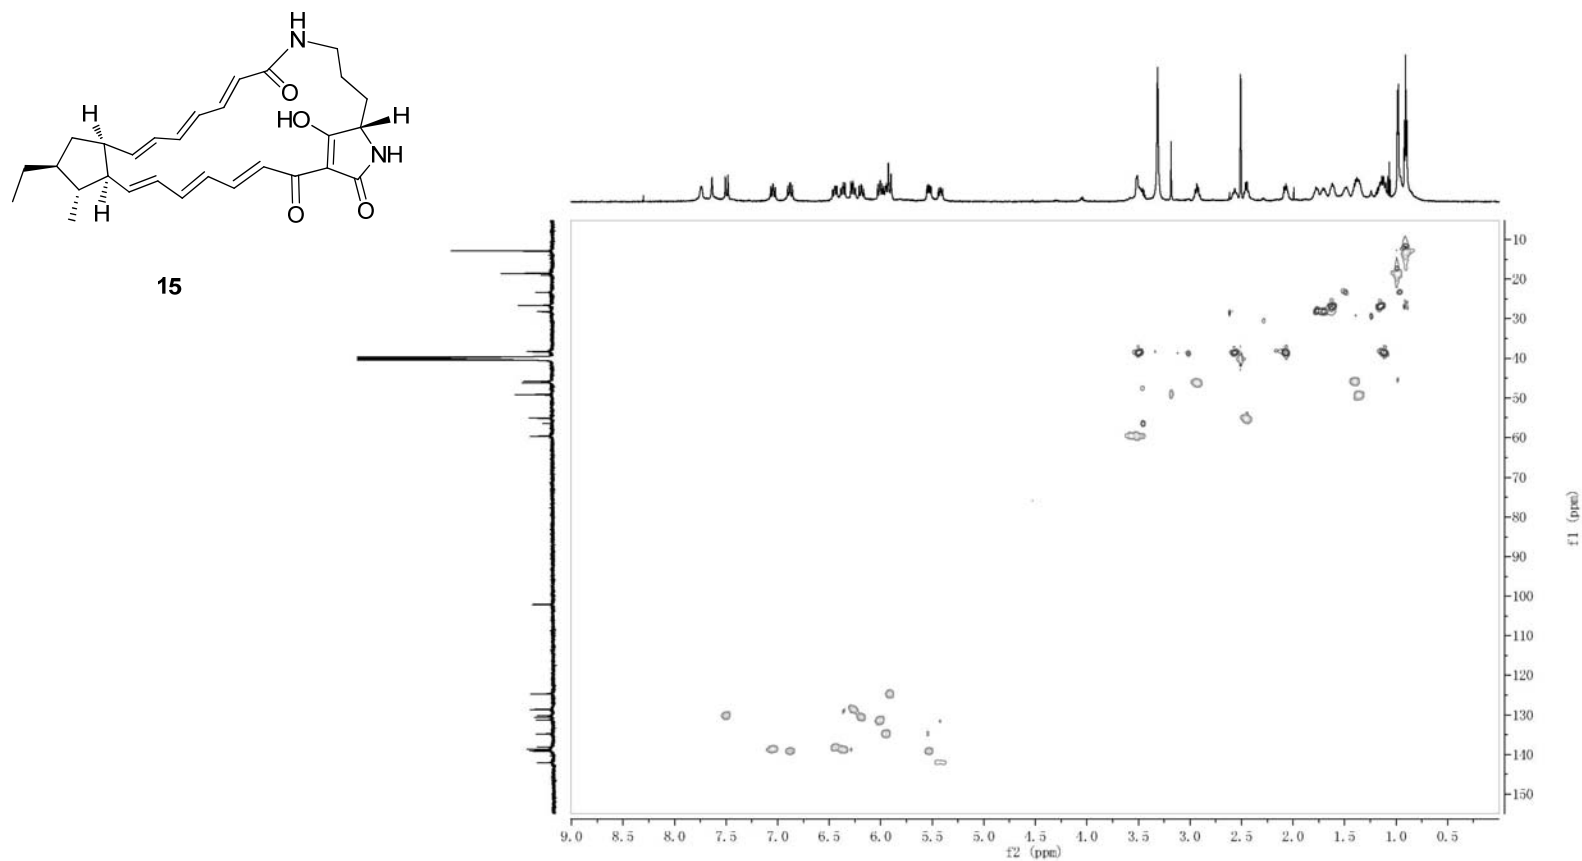

**Fig. S12.** Spectral data for pactamide E (**15**) (continued).  
**(F)** The HMBC spectrum of pactamide E (**15**) in DMSO- $d_6$ .

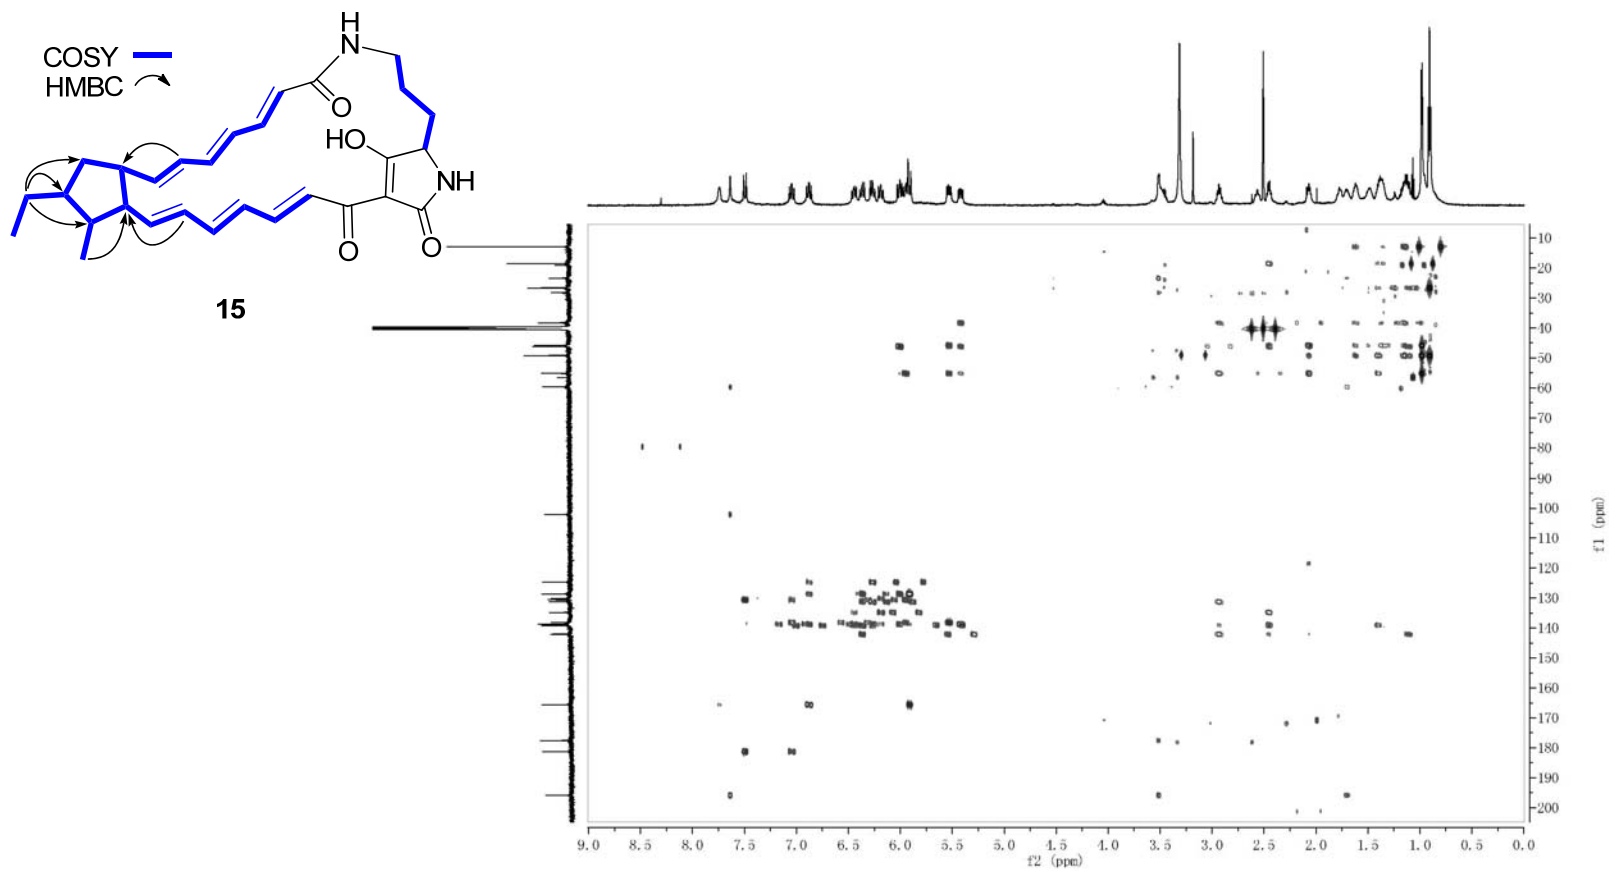

**Fig. S12.** Spectral data for pactamide E (**15**) (continued).  
**(G)** The NOESY spectrum of pactamide E (**15**) in DMSO- $d_6$ .

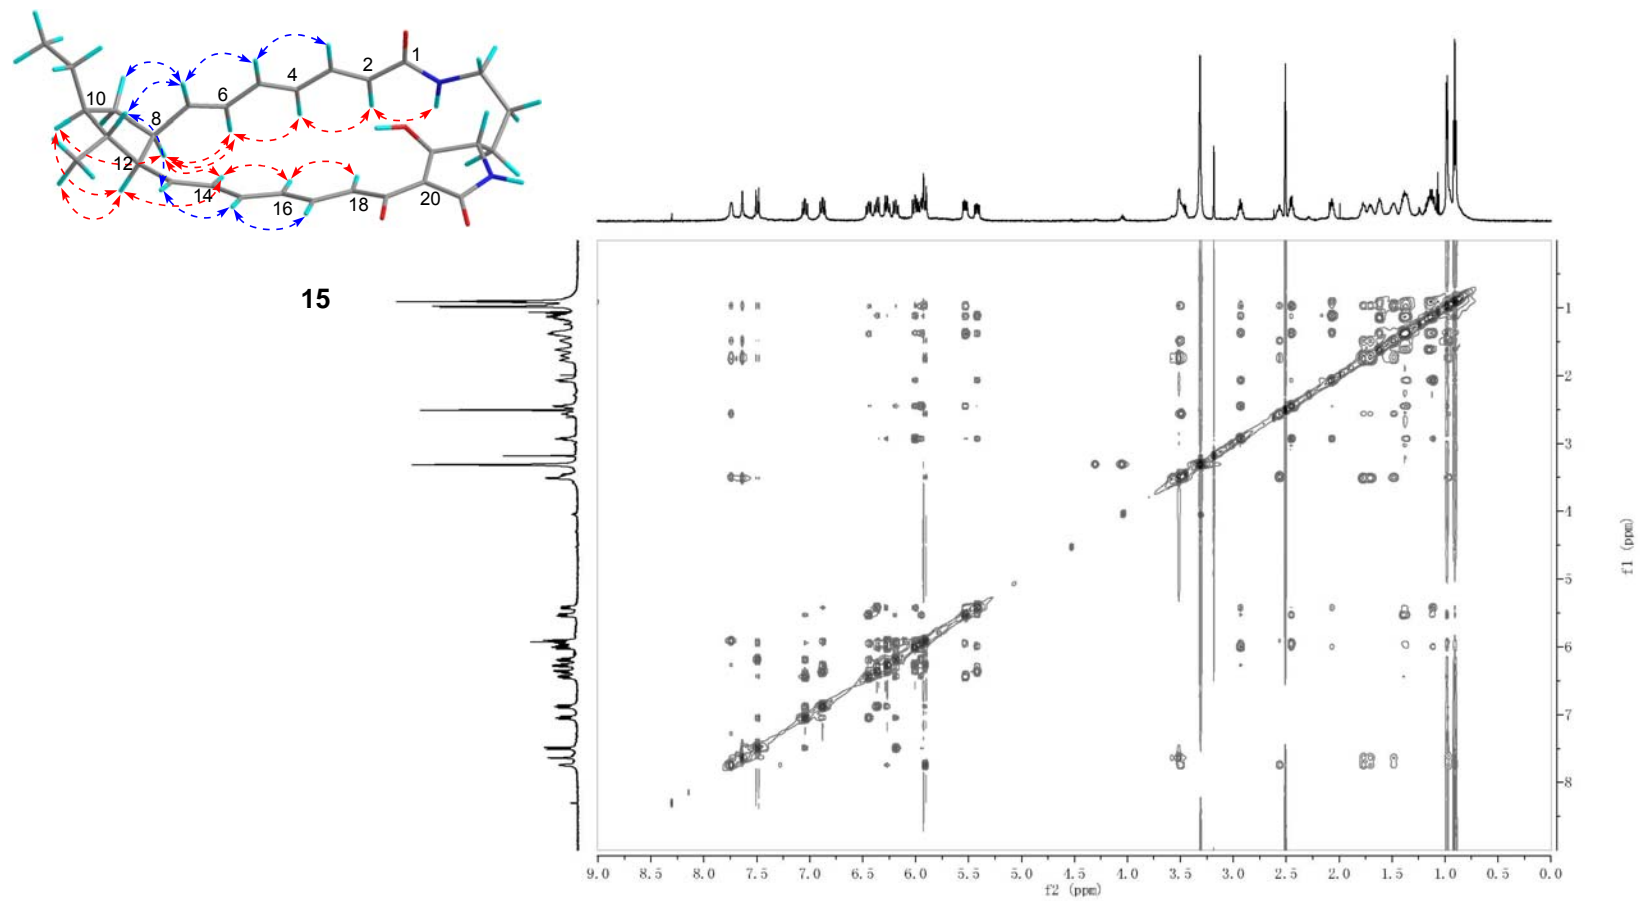

**Fig. S13.** Spectral data for pactamide F (**16**).

(A) HR-ESI-MS.

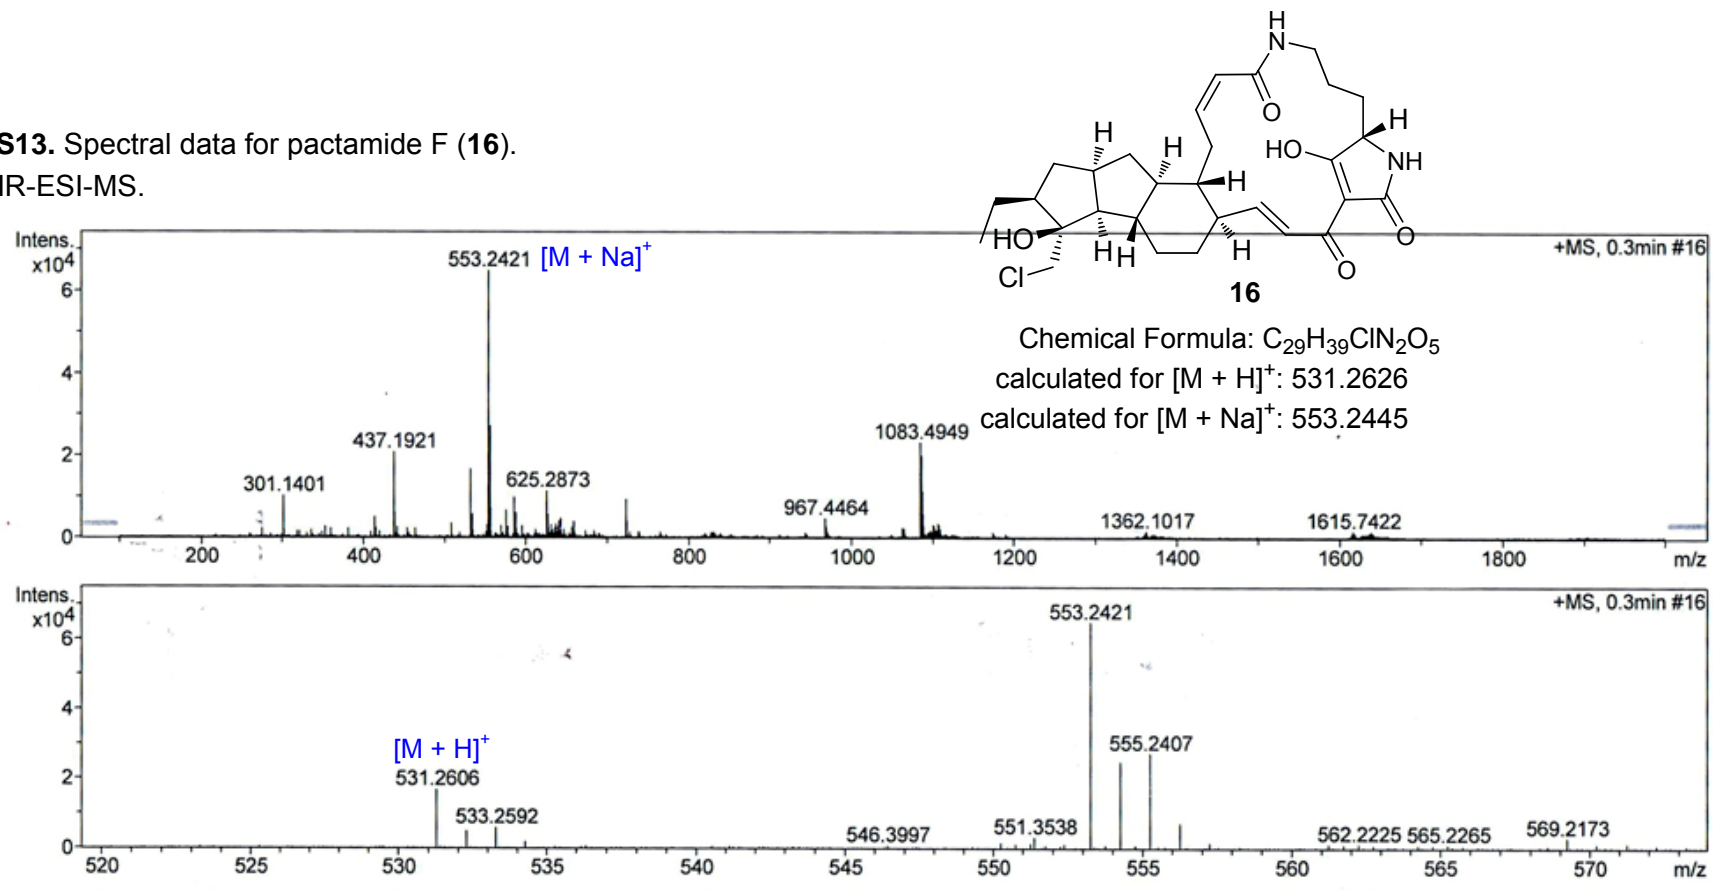

**Fig. S13.** Spectral data for pactamide F (**16**) (continued).  
**(B)** The  $^1\text{H}$  NMR spectrum of pactamide F (**16**) in  $\text{DMSO-}d_6$ .

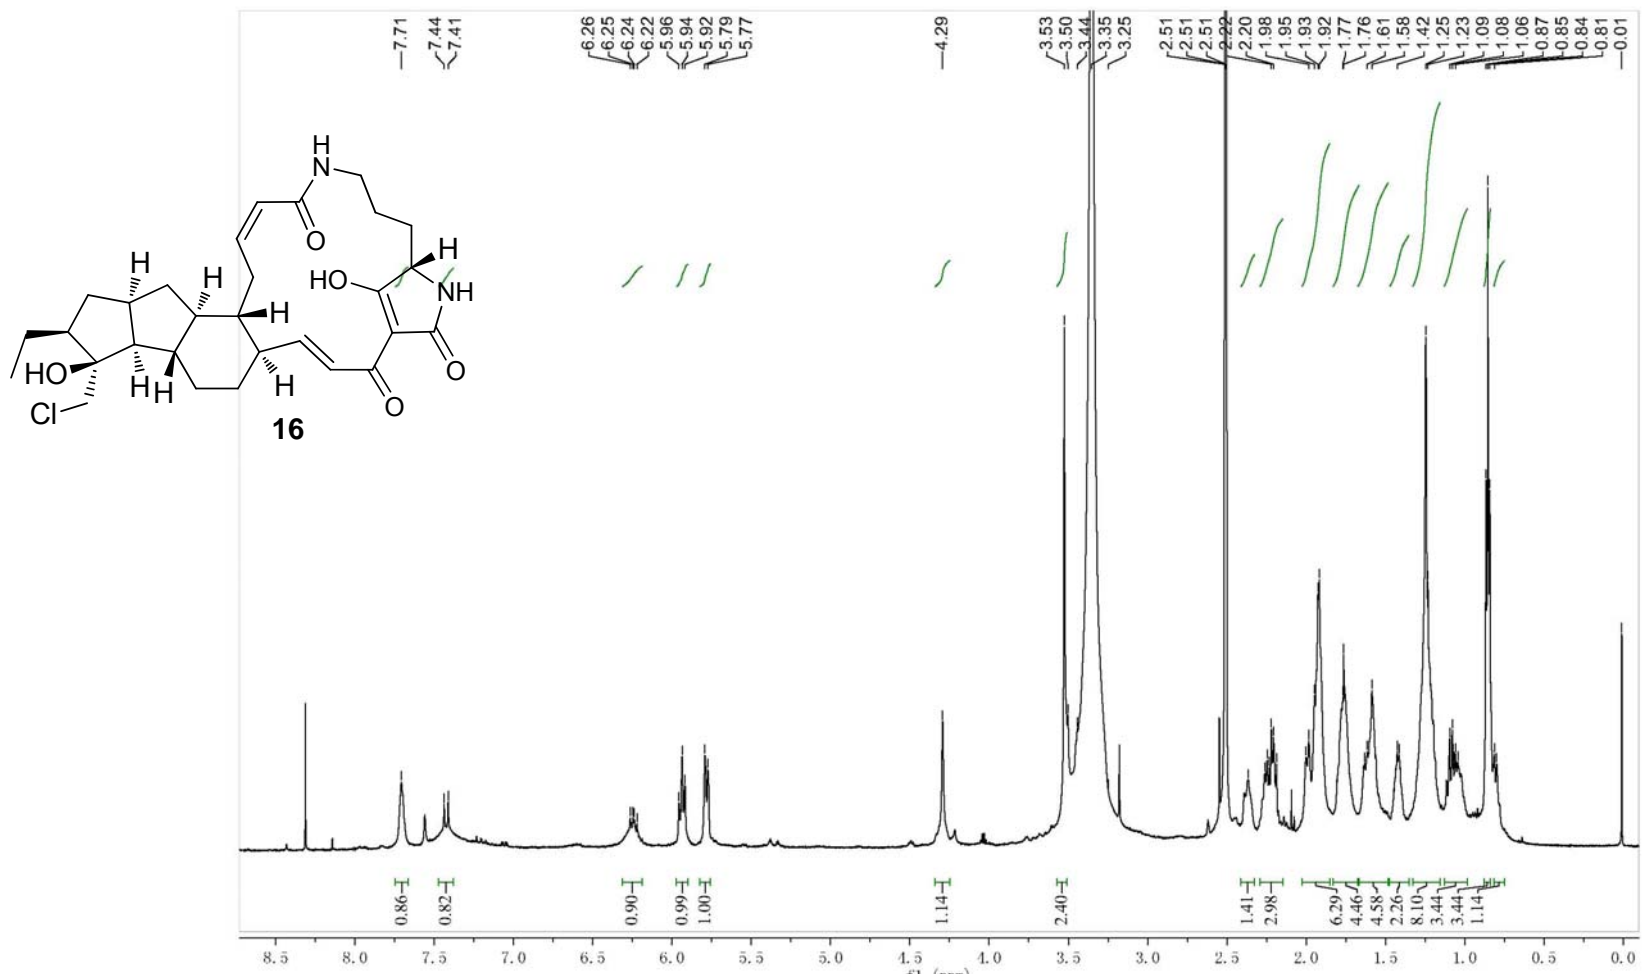



**Fig. S13.** Spectral data for pactamide E (**16**) (continued).  
(C) The  $^{13}\text{C}$  NMR spectrum of pactamide E (**16**) in  $\text{DMSO}-d_6$ .

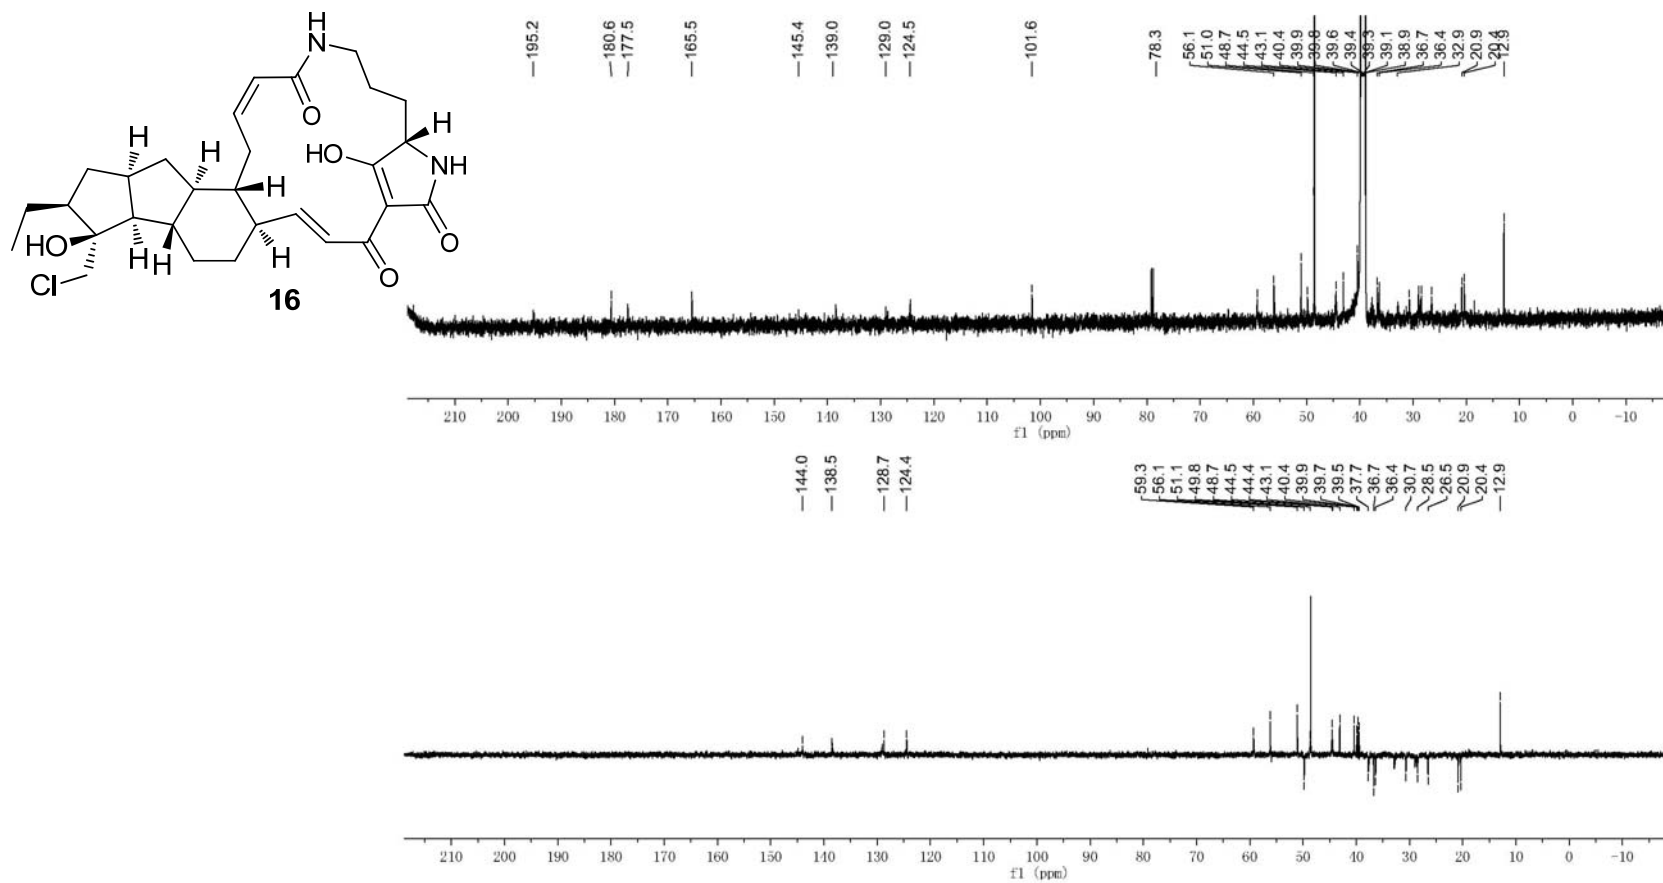

**Fig. S13.** Spectral data for pactamide E (**16**) (continued).  
**(D)** The HSQC spectrum of pactamide E (**16**) in DMSO-*d*<sub>6</sub>.

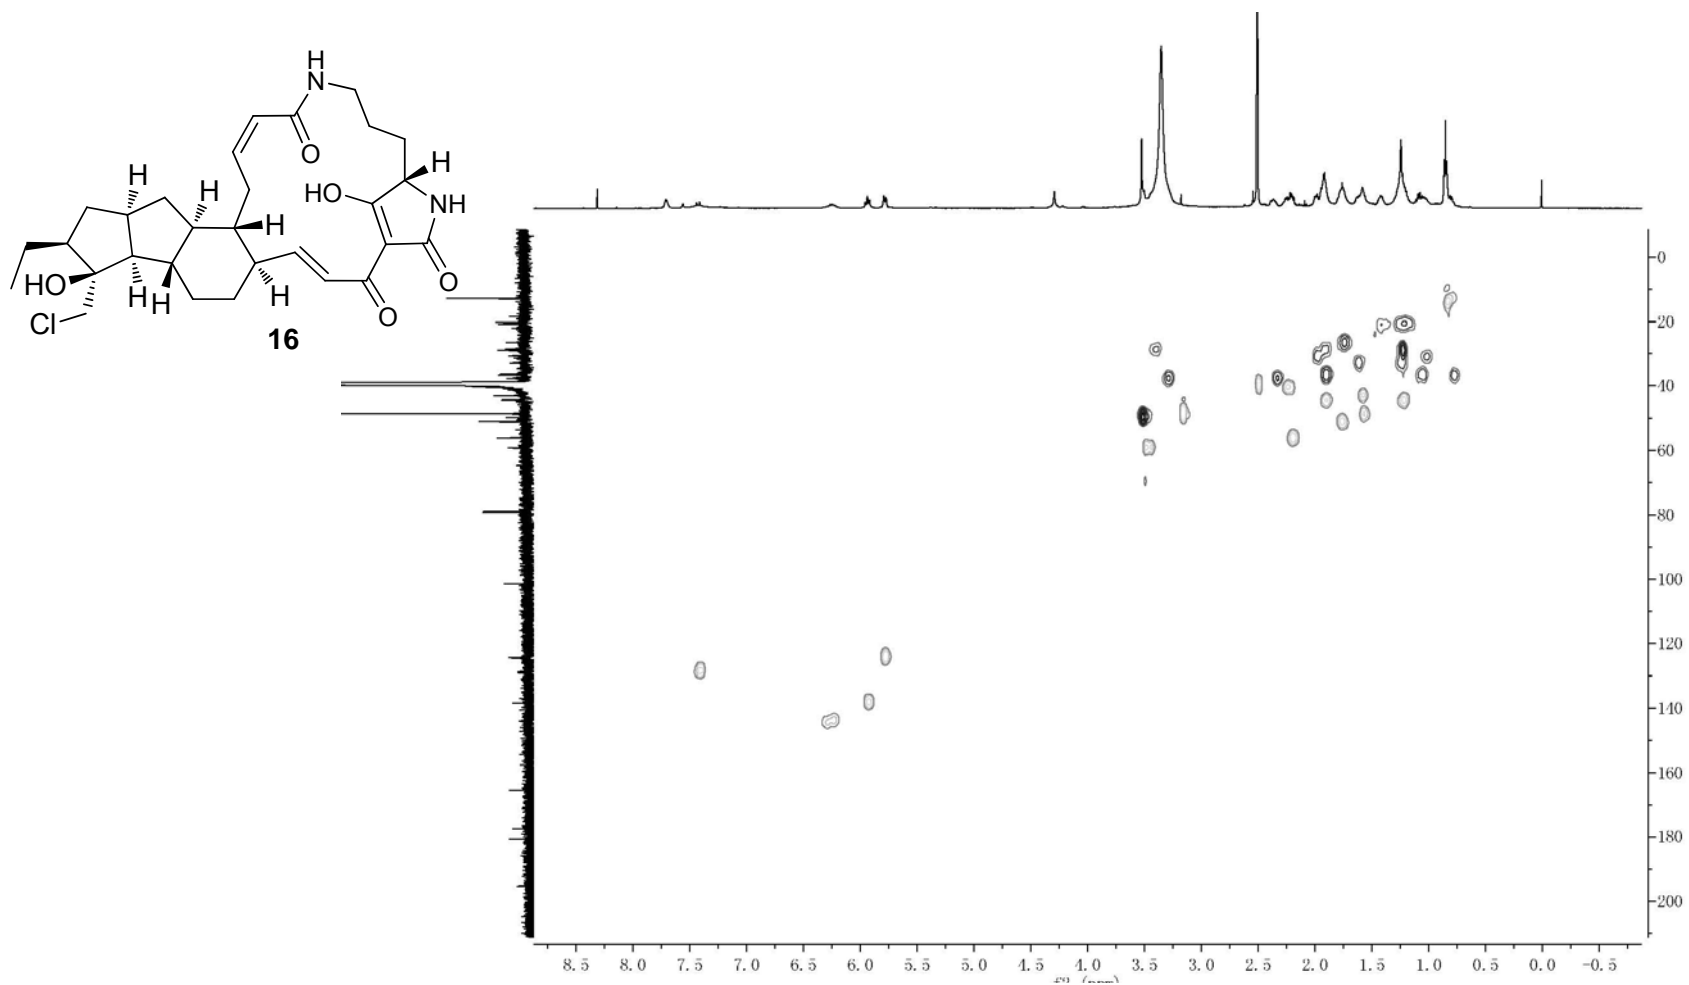

**Fig. S13.** Spectral data for pactamide E (**16**) (continued).  
**(E)** The HMBC spectrum of pactamide E (**16**) in DMSO-*d*<sub>6</sub>.

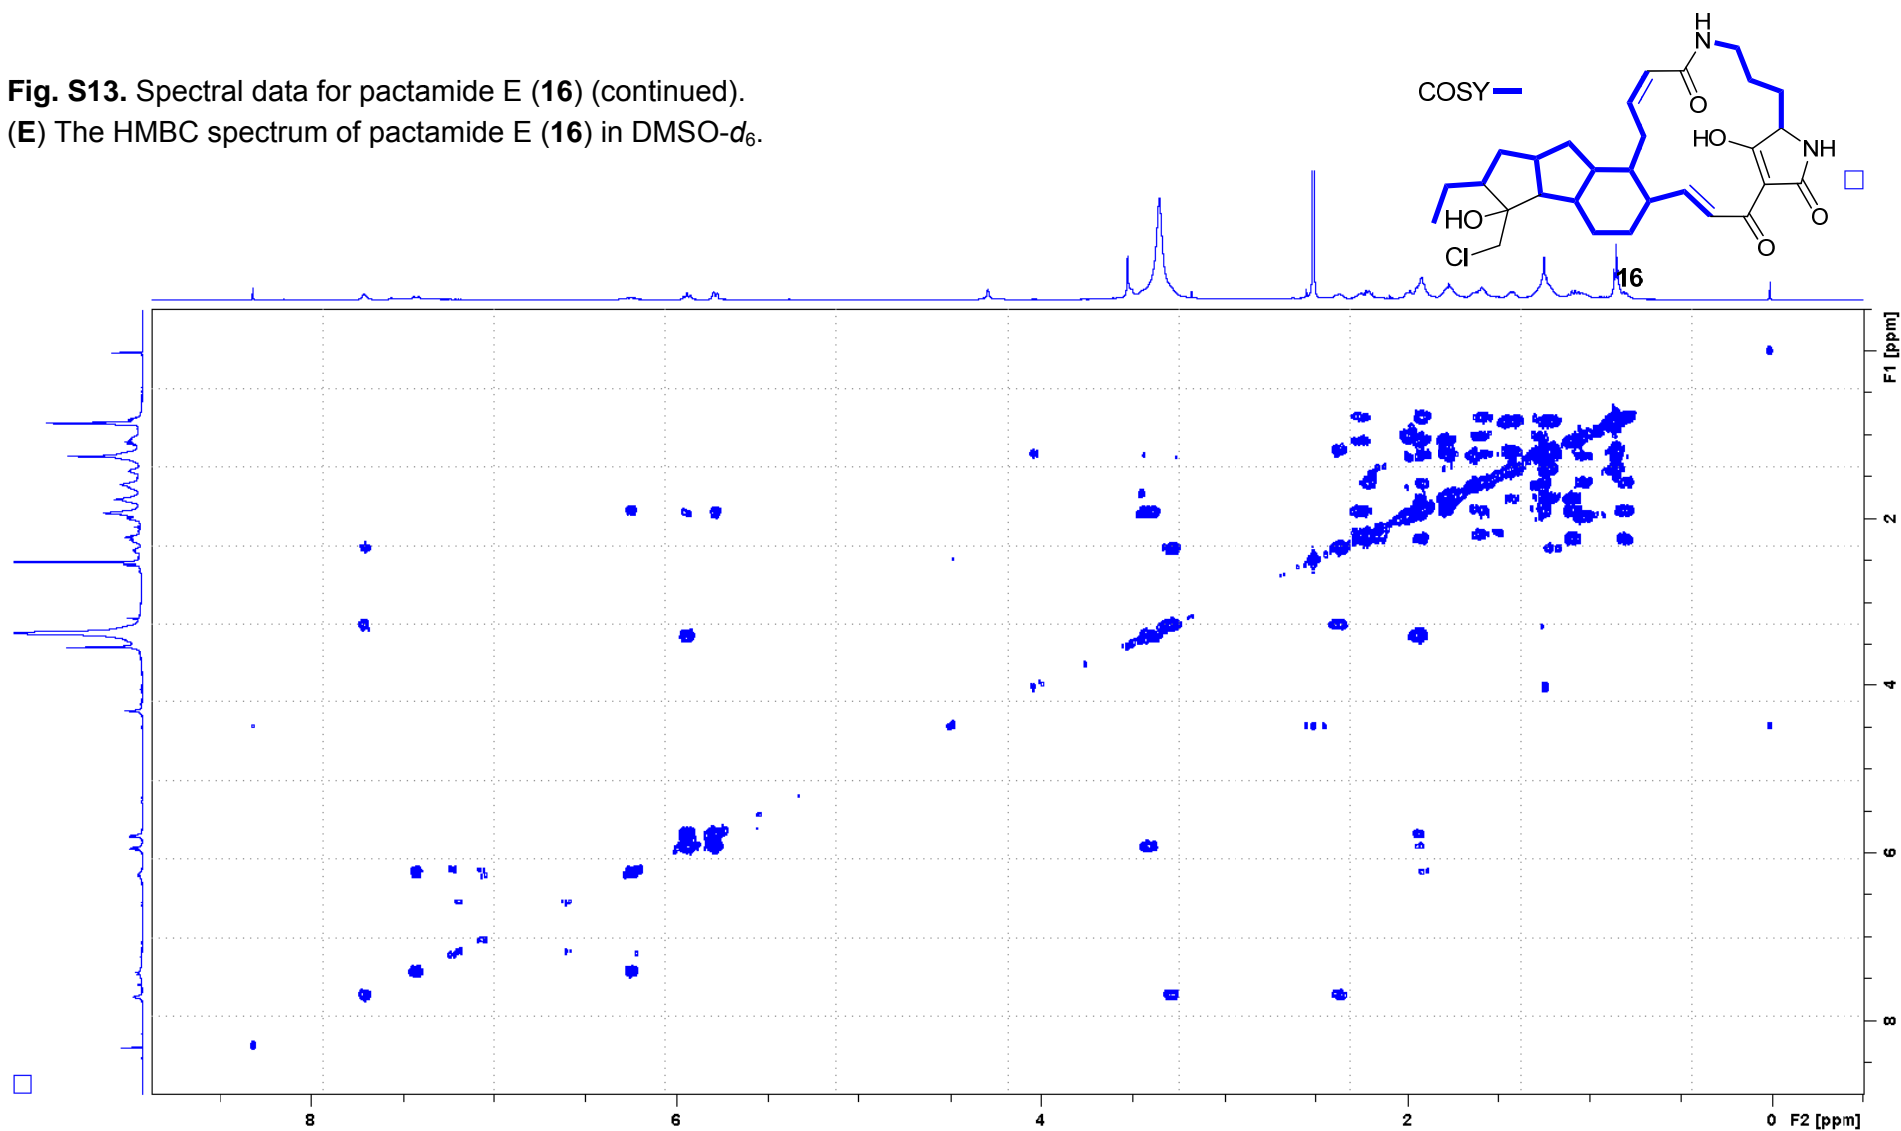

**Fig. S13.** Spectral data for pactamide E (**16**) (continued).  
**(F)** The HMBC spectrum of pactamide E (**16**) in DMSO-*d*<sub>6</sub>.

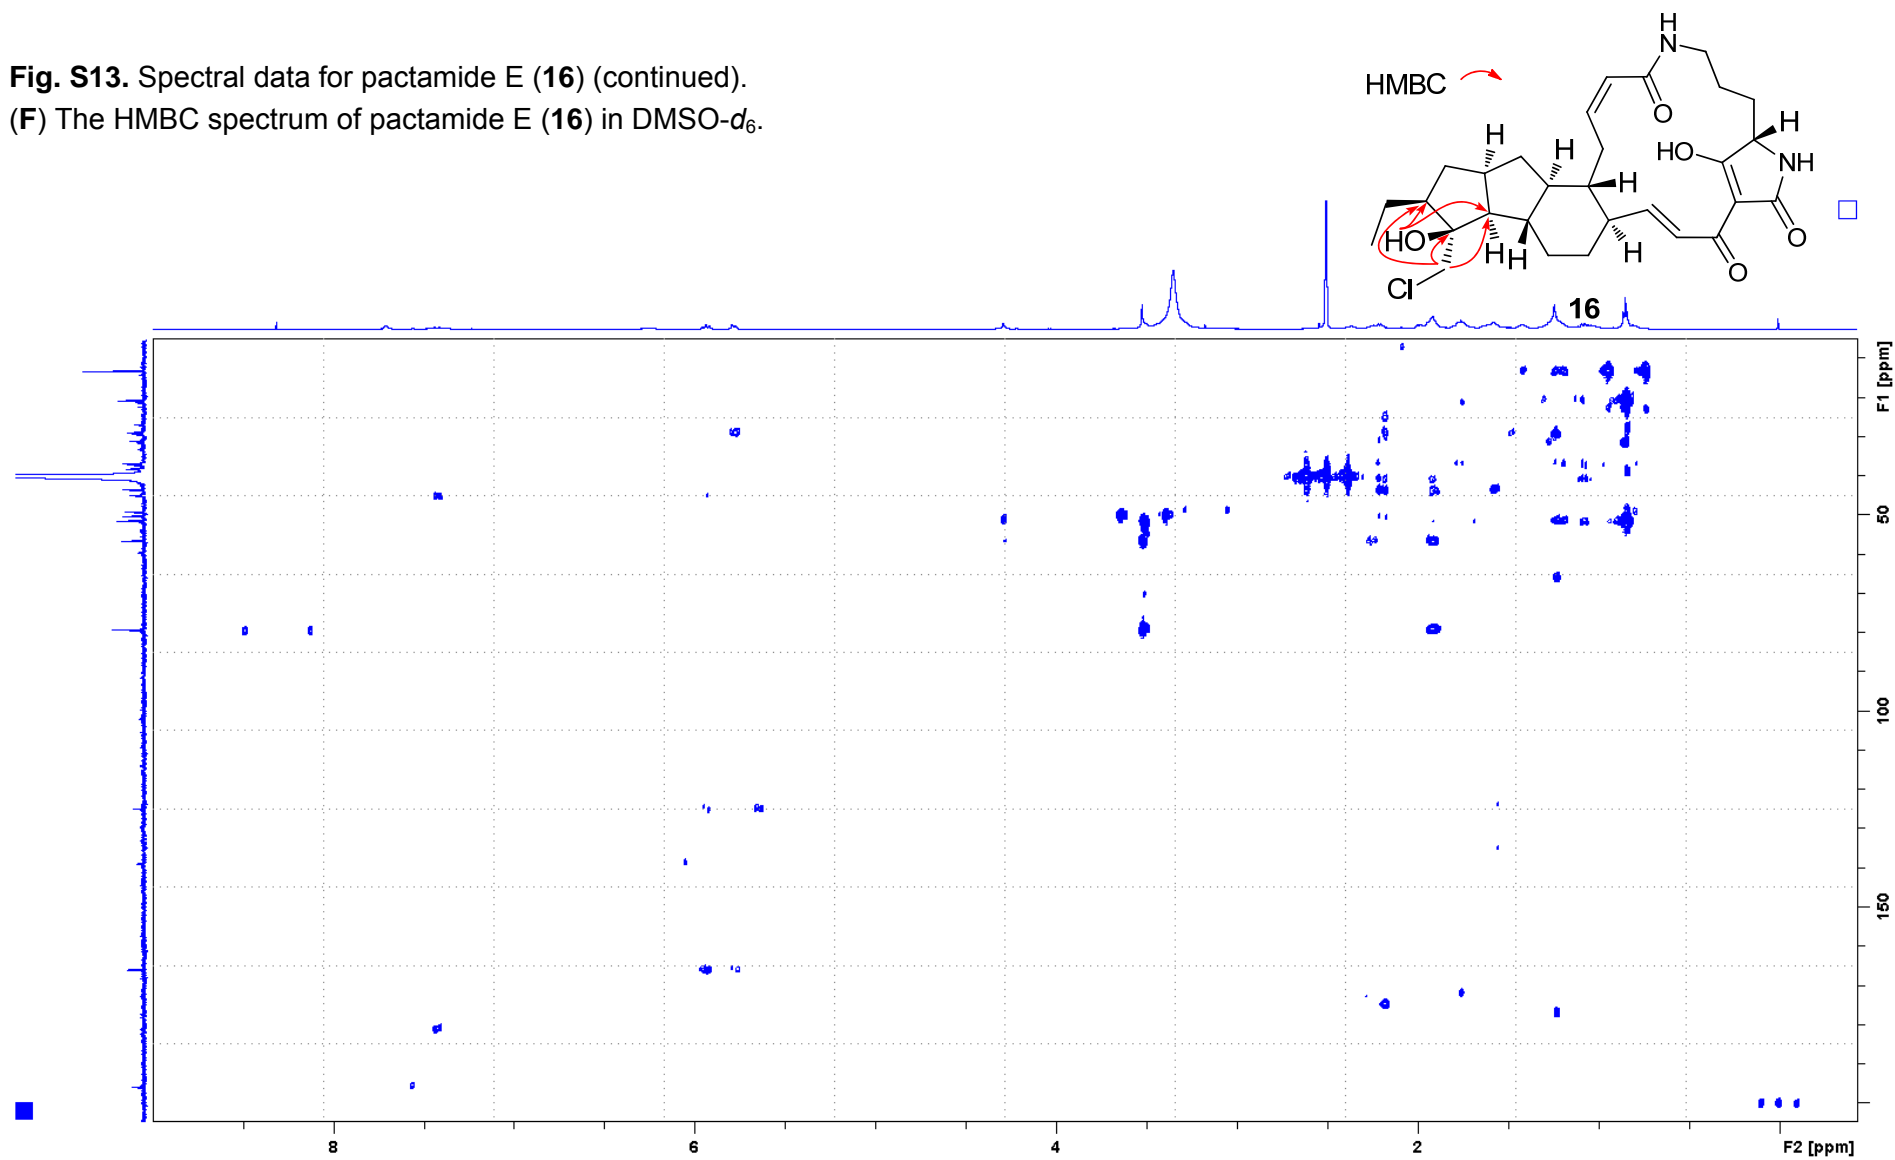

**Fig. S13.** Spectral data for pactamide E (**16**) (continued).  
**(G)** The NOESY spectrum of pactamide E (**16**) in DMSO- $d_6$ .

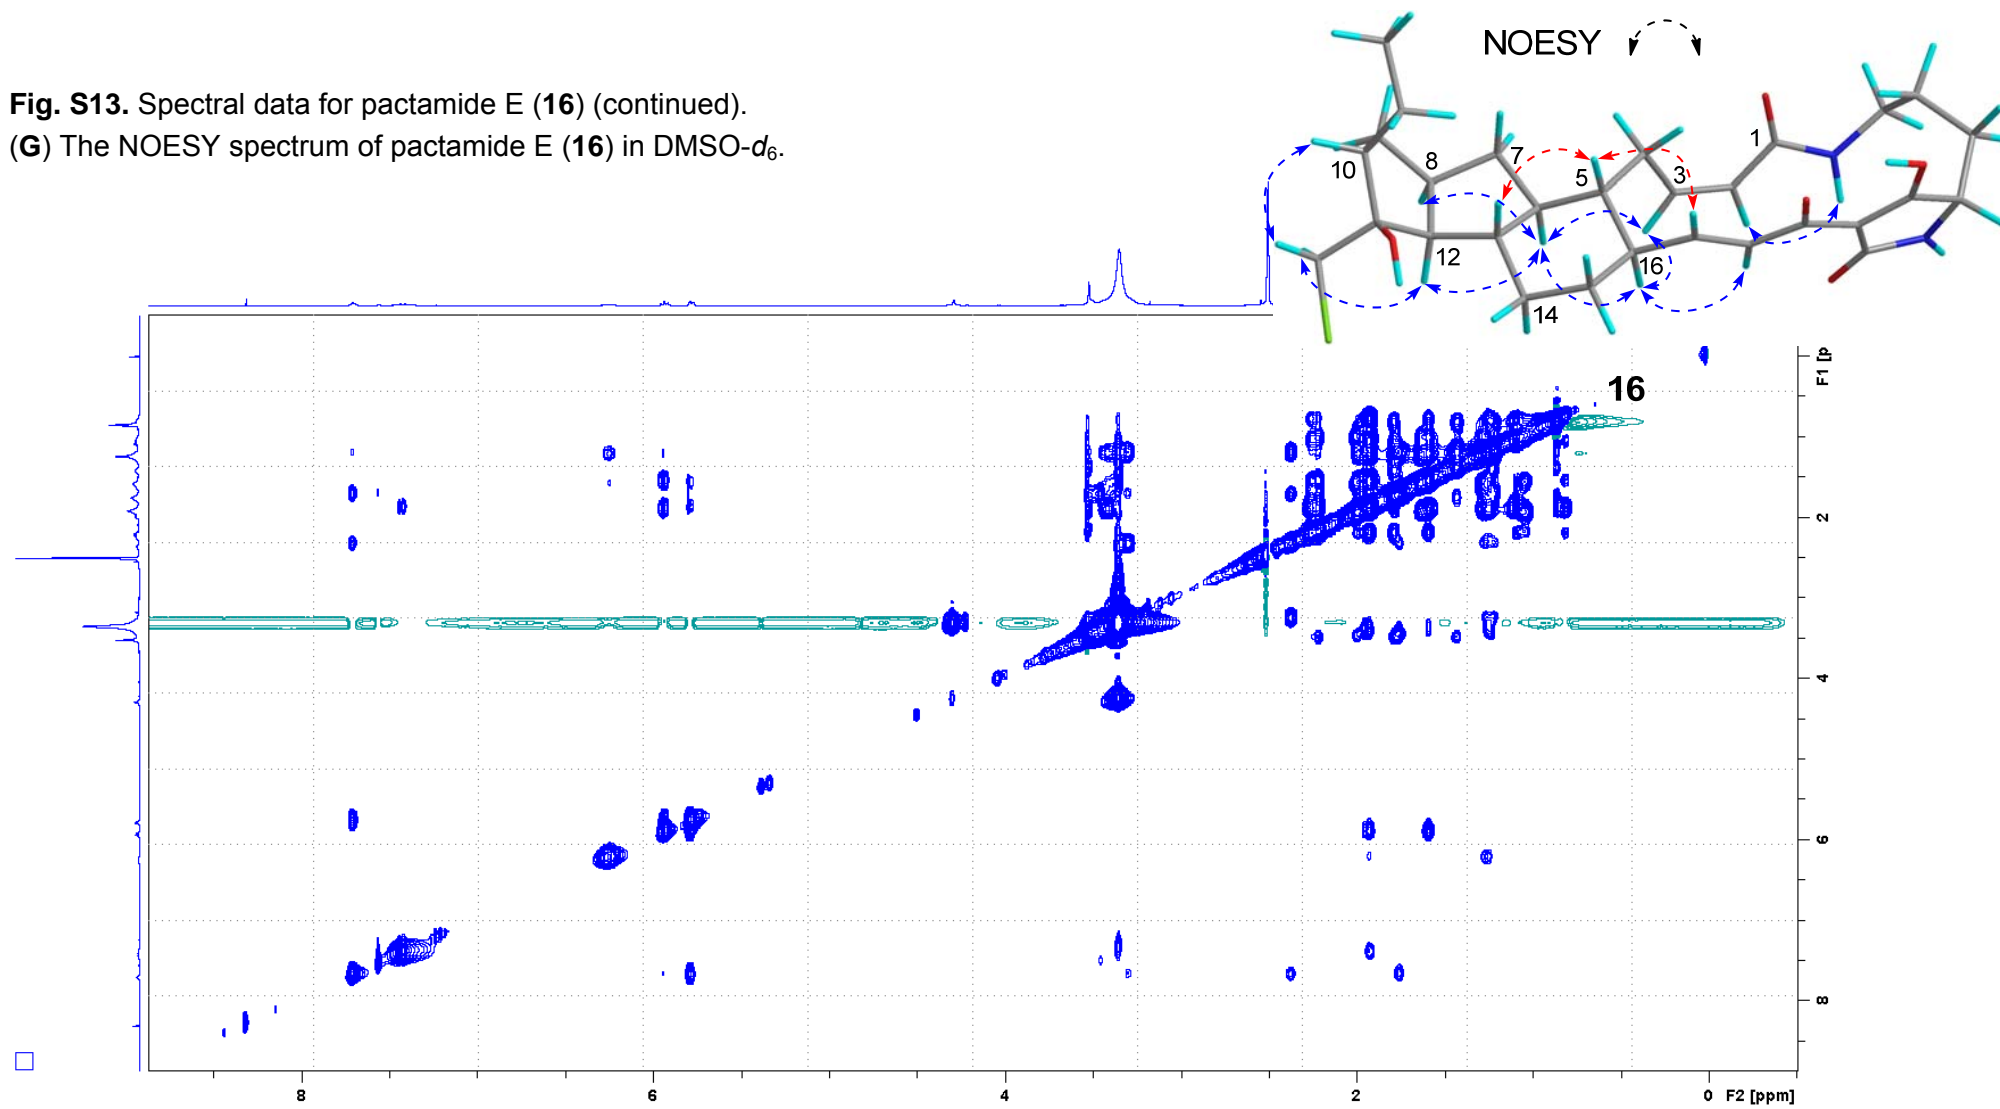

**Fig. S14.** Chemical structures of some other PTMs.

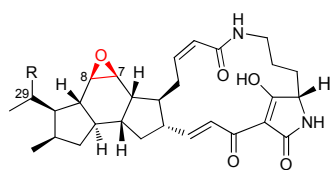

epoxykarugamycin: R = H  
capsimycin: R = OMe

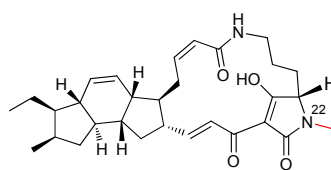

*N*-methyl-ikarugamycin

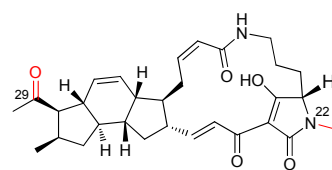

29-oxo-*N*-methyl-ikarugamycin

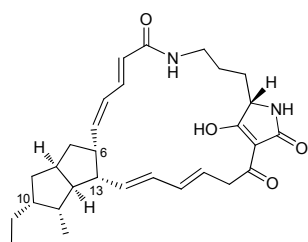

lysobacteramide A

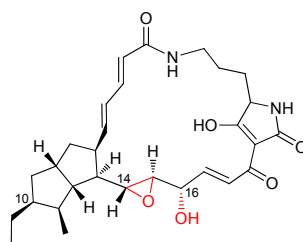

compound b

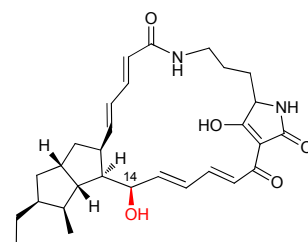

compound c

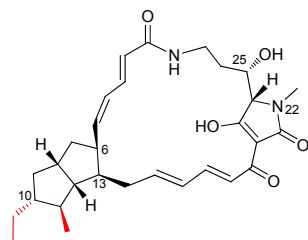

aburatubolactam A

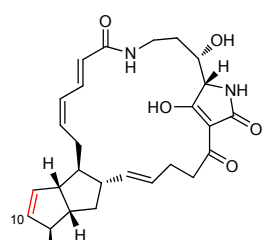

cylindramide

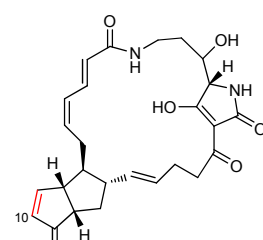

geodin A

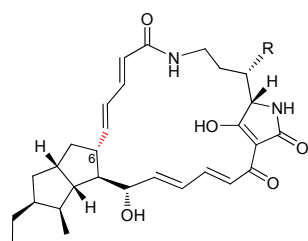

6-*epi*-alteramide A: R = OH  
6-*epi*-alteramide B: R = H

**Fig. S15.** SDS-PAGE analysis of purified proteins.

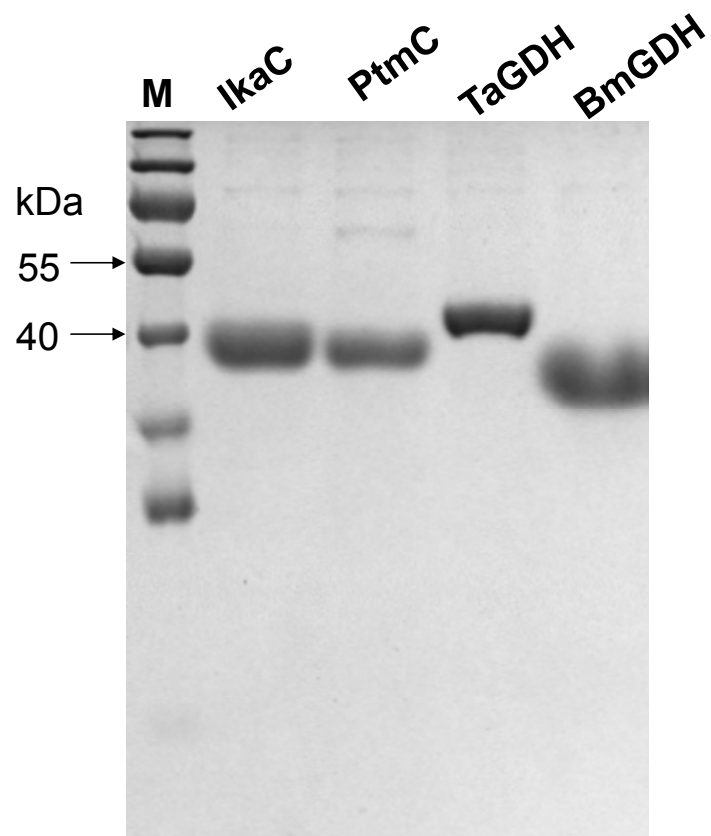

SDS-PAGE analysis of purified proteins of recombinant IkaC, PtmC, TaGDH and BmGDH. Lane M, protein molecular weight marker (Fermentas PageRuler Prestained Protein Ladder).

**Fig. S16.** LC-MS analysis of PtmC reactions with deuterium labelling.

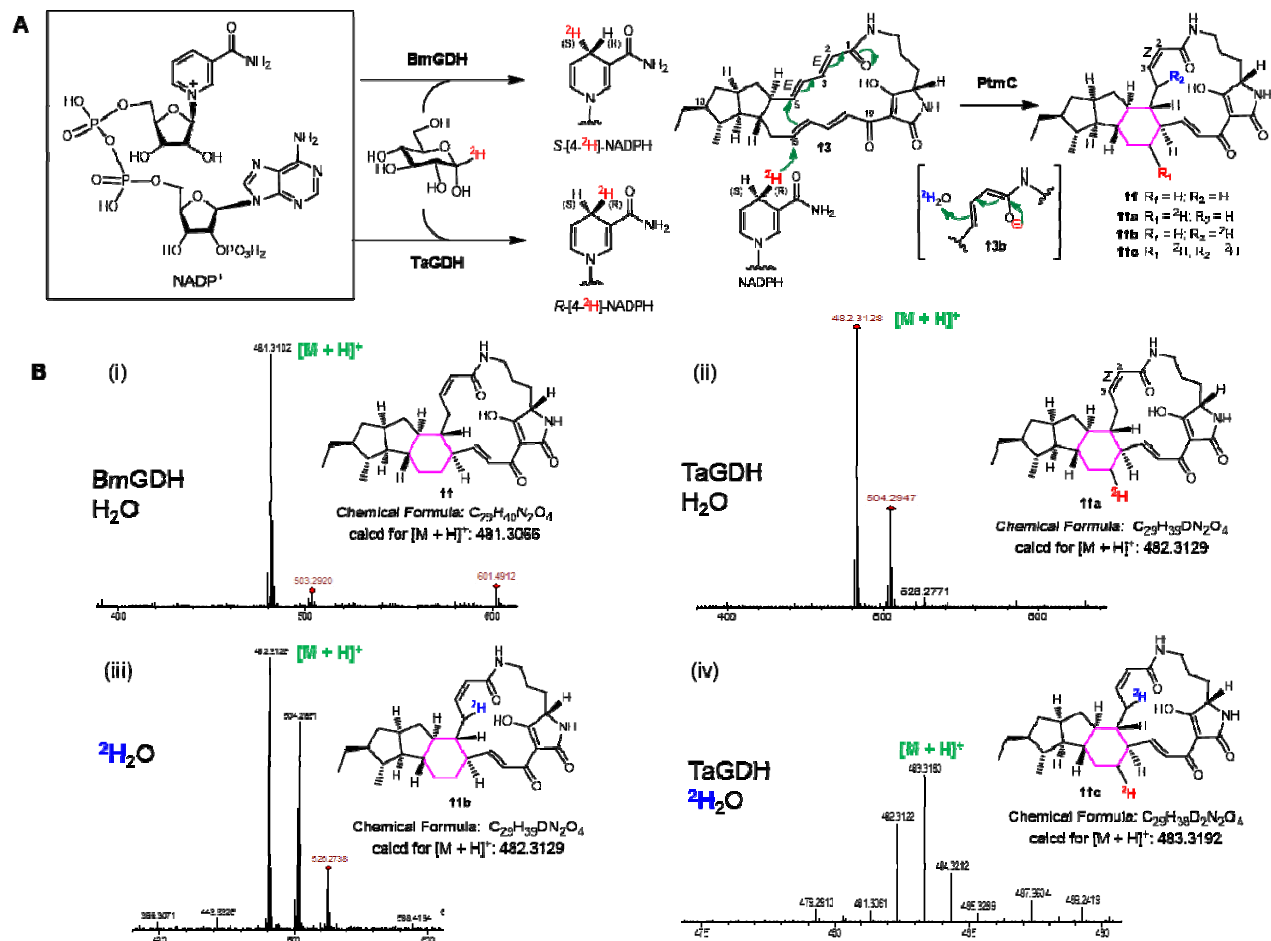

(A) A scheme for coupling PtmC reaction with glucose dehydrogenases BmGDH or TaGDH. (B) LC-HRESIMS data for PtmC assays coupling with (i) BmGDH in  $\text{H}_2\text{O}$  with D-[1- $^2\text{H}$ ]glucose; (ii) TaGDH in  $\text{H}_2\text{O}$  with D-[1- $^2\text{H}$ ]glucose; (iii)  $^2\text{H}_2\text{O}$ ; (iv) TaGDH in  $^2\text{H}_2\text{O}$  with D-[1- $^2\text{H}$ ]glucose.



**Fig. S17.** Spectral data for isoikarugamycin (**18**).

(A) HRESIMS.

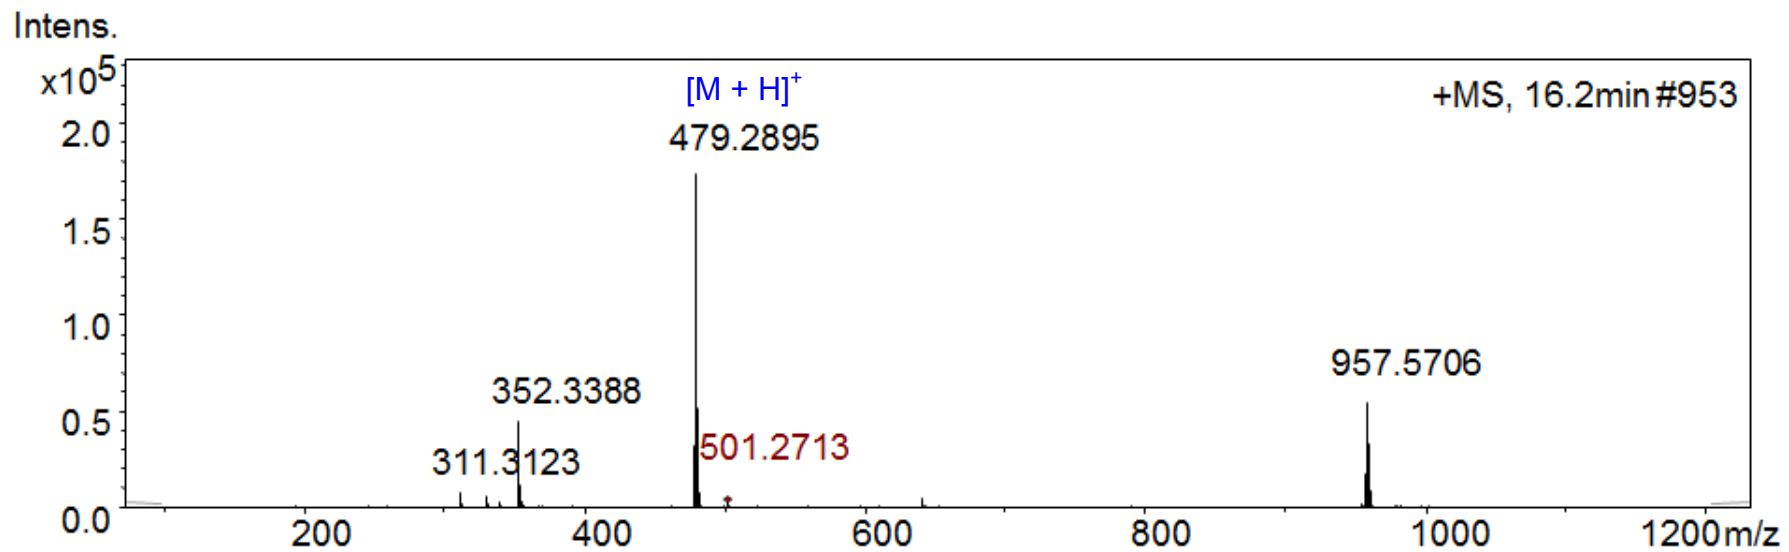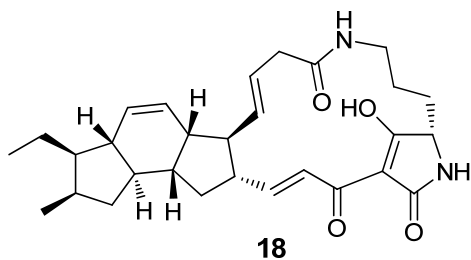

Chemical Formula: C<sub>29</sub>H<sub>38</sub>N<sub>2</sub>O<sub>4</sub>  
calculated for [M + H]<sup>+</sup>: 479.2910

**Fig. S17.** Spectral data for isoikarugamycin (**18**) (continued).  
**(B)** The  $^1\text{H}$  NMR spectrum of isoikarugamycin (**18**) in  $\text{CDCl}_3/\text{CD}_3\text{OD}$  (9:1).

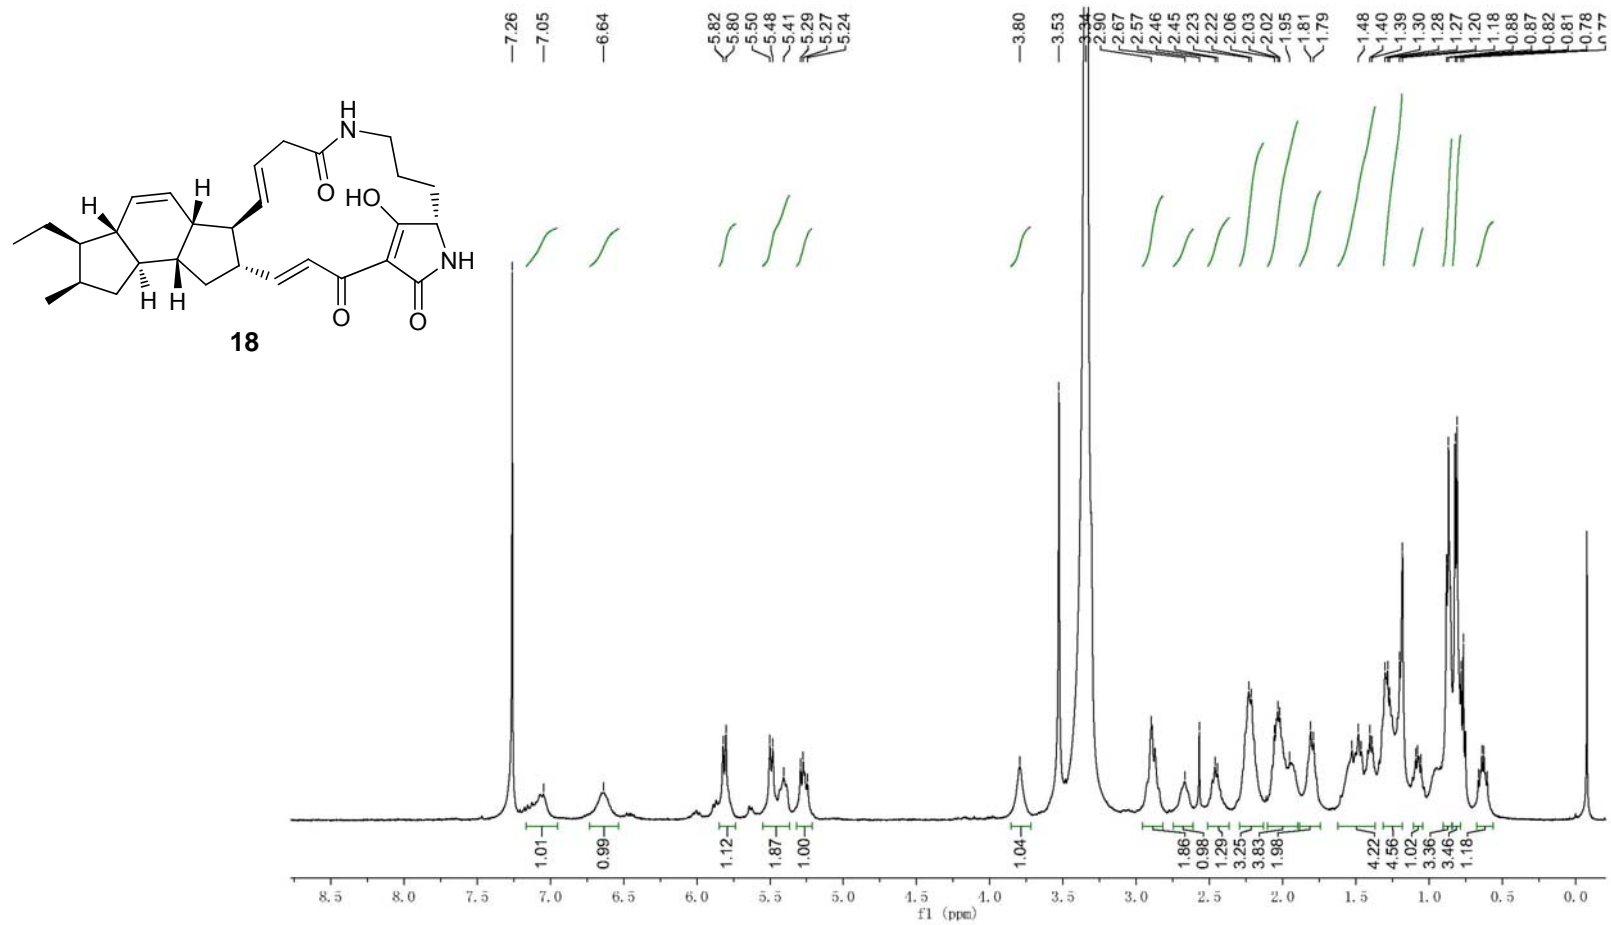

**Fig. S17.** Spectral data for isoikarugamycin (**18**) (continued).  
(C) The  $^{13}\text{C}$  NMR spectrum of isoikarugamycin (**18**) in  $\text{CDCl}_3/\text{CD}_3\text{OD}$  (9:1).

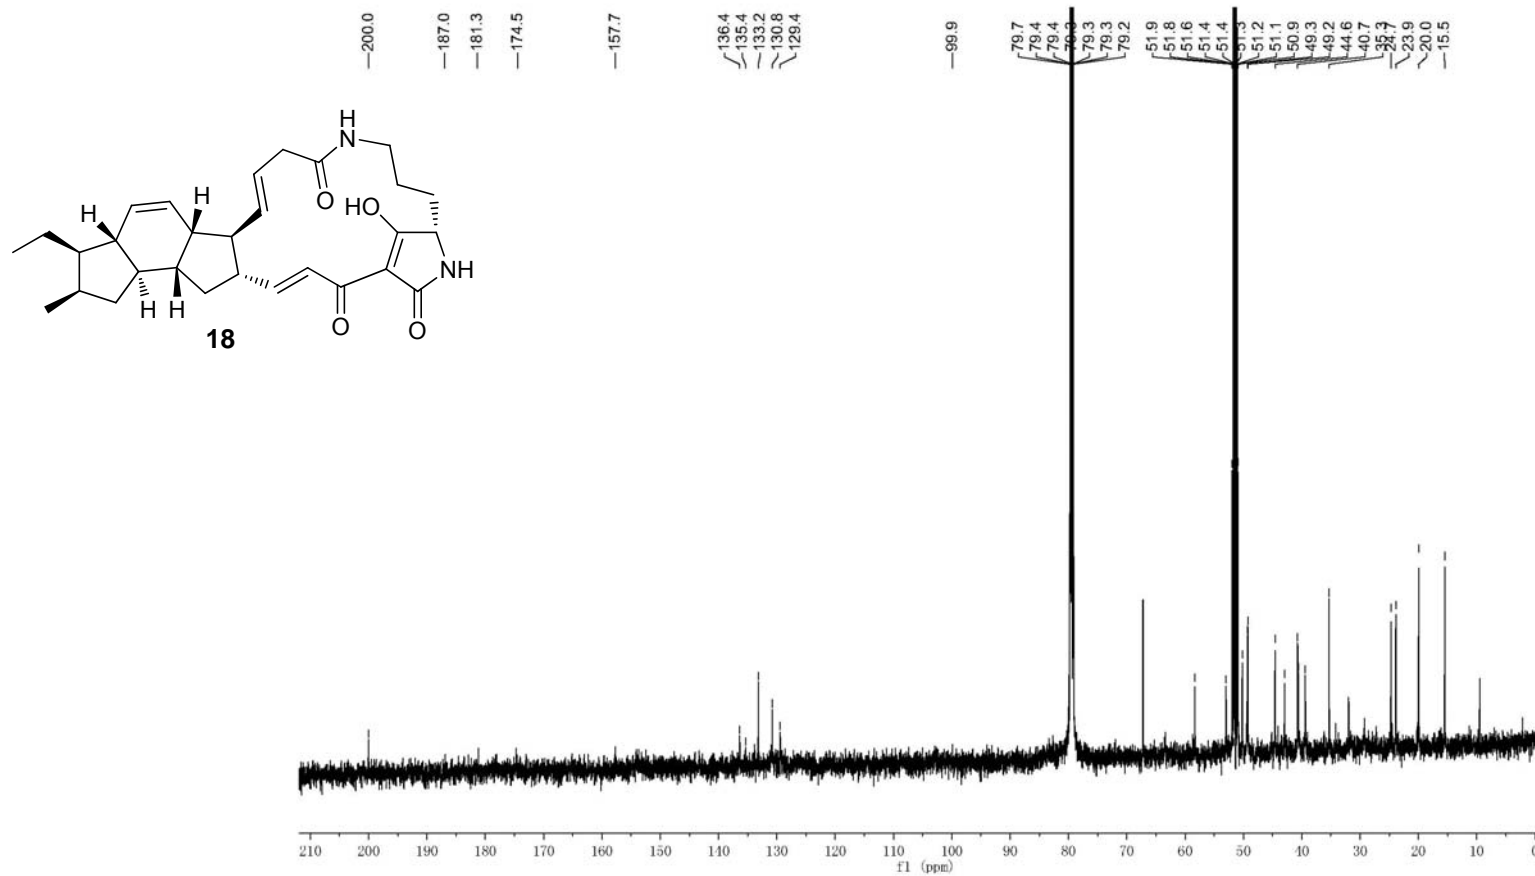

**Fig. S18.** *Streptomyces*-mediated Biotransformation of compound **15**.

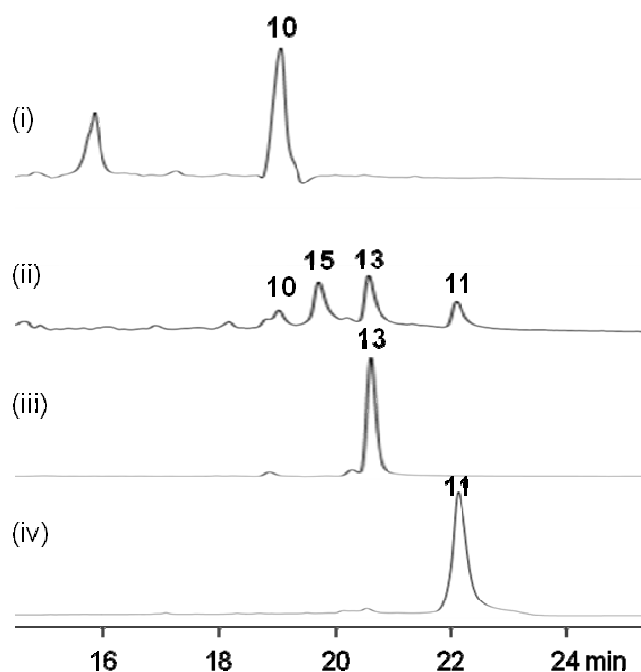

- (i) *S. lividans* TK64/pCSG2814 (detection at 360 nm)
- (ii) *S. lividans* TK64/pCSG2814 feeding with 50  $\mu$ M compound **15**;
- (iii) Standard compound **13**;
- (iv) Standard compound **11**.

The strains *S. lividans* TK64/pCSG2814 were inoculated into 30 mL of AM6 medium containing 50  $\mu$ g/mL apramycin with or without 50  $\mu$ M compound **15**, and were grown at 28 °C for 5 days. The mycelia were extracted by butanone and were analyzed by HPLC analysis. HPLC was carried out using a reversed phase column Luna C18, 5  $\mu$ m, 150  $\times$  4.6 mm (Phenomenex), with UV detection at 360 nm (for trace i) or 310 nm (for traces ii – iv) under the following program: solvent system (solvent A, 10% acetonitrile in water supplementing with 0.1% formic acid; solvent B, 90% acetonitrile in water); 5% B to 100% B (linear gradient, 0–18 min), 100% B (18–23 min), 100% B to 5% B (23–27 min), 5% B (27–32min); flow rate at 1 mL/min.

**Fig. S19.** Phylogenetic analysis of PtmD and its analogues.

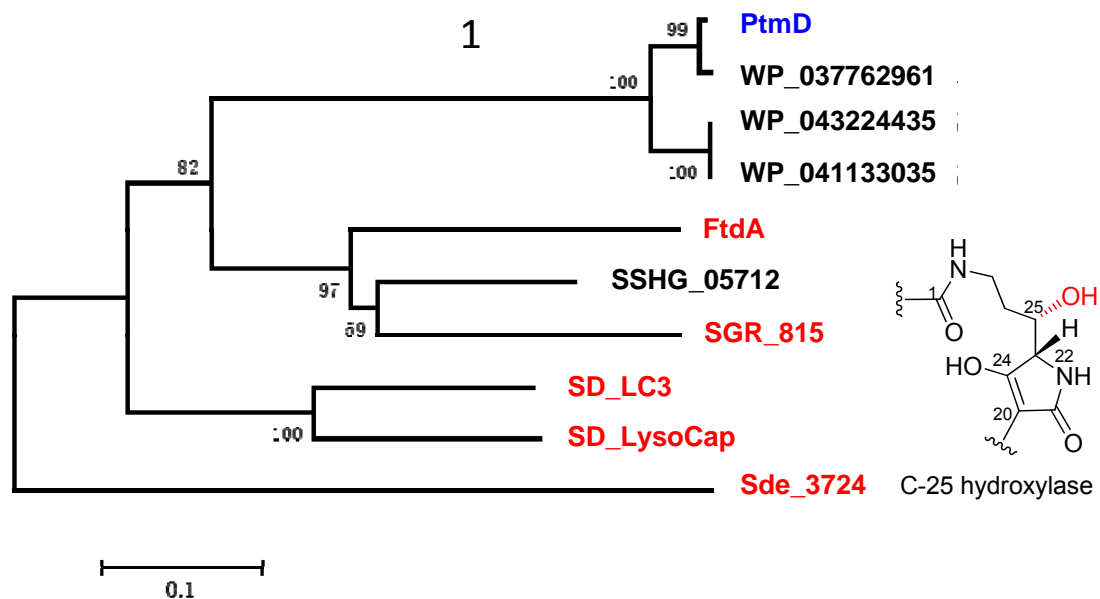

| Protein           | Source                                 | Identity% to PtmD | Similarity% to PtmD | GenBank accession number | Reference     |
|-------------------|----------------------------------------|-------------------|---------------------|--------------------------|---------------|
| <b>FtdA</b>       | <i>Streptomyces</i> sp. SPB78          | 56                | 69                  | EFL02192.1               | <sup>15</sup> |
| <b>SD_LC3</b>     | <i>Lysobacter enzymogenes</i>          | 54                | 67                  | ABL86392.1               | <sup>16</sup> |
| <b>SD_LysoCap</b> | <i>Lysobacter capsici</i>              | 54                | 69                  | ALN85284.1               | <sup>17</sup> |
| SSHG_05712        | <i>Streptomyces albus</i> J1074        | 59                | 69                  | EFE85270.1               |               |
| <b>SGR_815</b>    | <i>Streptomyces griseus</i> NBRC 13350 | 54                | 65                  | BAG17644.1               | <sup>18</sup> |
| <b>Sde_3724</b>   | <i>Saccharophagus degradans</i> 2-40   | 44                | 61                  | ABD82979.1               | <sup>17</sup> |
| WP_037762961      | <i>Streptomyces</i> sp. FXJ7.023       | 99                | 99                  | WP_037762961             |               |
| WP_043224435      | <i>Streptomyces</i> sp. NRRL F-5193    | 92                | 94                  | WP_043224435             |               |
| WP_041133035      | <i>Streptomyces vietnamensis</i>       | 91                | 93                  | WP_041133035             |               |

The function of enzymes in red has been confirmed as C-25 hydroxylases.

**Fig. S20.** Comparison of highly similar PTM gene clusters and their distinct products.

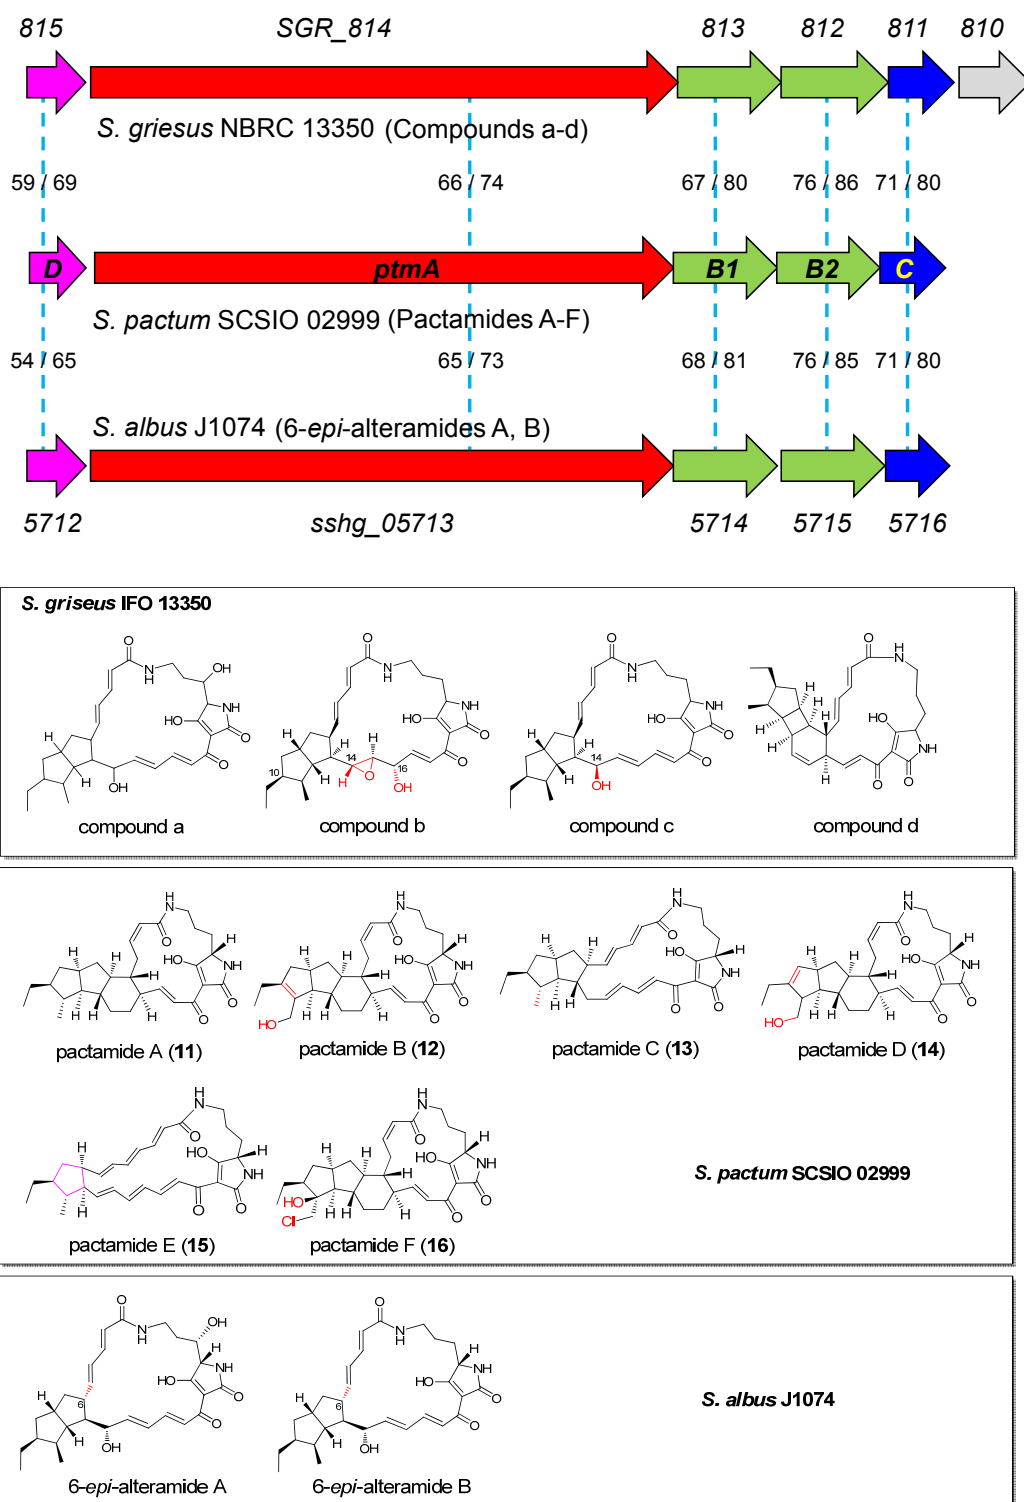

## Supplementary References

1. M. Doumith, P. Weingarten, U. F. Wehmeier, K. Salah-Bey, B. Benhamou, C. Capdevila, J. M. Michel, W. Piepersberg and M. C. Raynal, *Mol. Gen. Genet.*, 2000, **264**, 477-485.
2. Y. Zhang, H. Huang, Q. Chen, M. Luo, A. Sun, Y. Song, J. Ma and J. Ju, *Org. Lett.*, 2013, **15**, 3254-3257.
3. H. Li, Q. Zhang, S. Li, Y. Zhu, G. Zhang, H. Zhang, X. Tian, S. Zhang, J. Ju and C. Zhang, *J. Am. Chem. Soc.*, 2012, **134**, 8996-9005.
4. Q. Zhang, A. Mándi, S. Li, Y. Chen, W. Zhang, X. Tian, H. Zhang, H. Li, W. Zhang, S. Zhang, J. Ju, T. Kurtán and C. Zhang, *Eur. J. Org. Chem.*, 2012, **2012**, 5256-5262.
5. T. Kieser, Bibb, M. J., Buttner, M. J., Chater, K. F. & Hopwood, D. A., *Practical Streptomyces Genetics*, Norwich, 2000.
6. L. Xu, P. Wu, S. J. Wright, L. Du and X. Wei, *J. Nat. Prod.*, 2015, **78**, 1841-1847.
7. G. Zhang, W. Zhang, S. Saha and C. Zhang, *Curr. Top. Med. Chem.*, 2016, **16**, 1727-1739.
8. G. T. Zhang, W. J. Zhang, Q. B. Zhang, T. Shi, L. Ma, Y. G. Zhu, S. M. Li, H. B. Zhang, Y. L. Zhao, R. Shi and C. S. Zhang, *Angew. Chem. Int. Ed.*, 2014, **53**, 4840-4844.
9. Z. C. Wu, D. L. Li, Y. C. Chen and W. M. Zhang, *Helv. Chim. Acta*, 2010, **93**, 920-924.
10. K. A. Datsenko and B. L. Wanner, *Proc. Natl. Acad. Sci. USA*, 2000, **97**, 6640-6645.
11. D. J. MacNeil, K. M. Gewain, C. L. Ruby, G. Dezeny, P. H. Gibbons and T. MacNeil, *Gene*, 1992, **111**, 61-68.
12. Y. Zhu, P. Fu, Q. Lin, G. Zhang, H. Zhang, S. Li, J. Ju, W. Zhu and C. Zhang, *Org. Lett.*, 2012, **14**, 2666-2669.
13. B. Gust, G. L. Challis, K. Fowler, T. Kieser and K. F. Chater, *Proc. Natl. Acad. Sci. USA*, 2003, **100**, 1541-1546.
14. R. Lacret, D. Oves-Costales, C. Gomez, C. Diaz, M. de la Cruz, I. Perez-Victoria, F. Vicente, O. Genilloud and F. Reyes, *Mar. Drugs*, 2015, **13**, 128-140.
15. J. A. V. Blodgett, D. C. Oh, S. G. Cao, C. R. Currie, R. Kolter and J. Clardy, *Proc. Natl. Acad. Sci. U S A.*, 2010, **107**, 11692-11697.
16. Y. Y. Li, J. Huffman, Y. Li, L. C. Du and Y. M. Shen, *MedChemComm*, 2012, **3**, 982-986.
17. C. Greunke, J. Antosch and T. A. Gulder, *Chem. Commun.*, 2015, **51**, 5334-5336.
18. Y. Luo, H. Huang, J. Liang, M. Wang, L. Lu, Z. Shao, R. E. Cobb and H. Zhao, *Nat. Commun.*, 2013, **4**, DOI: 10.1038/ncomms3894.
